# Supplementary material
Source: PubMed Central journal article supplement (PMC6942545)
Supplement: NIHMS1059064-supplement-sup_info.pdf [file NIHMS1059064-supplement-sup_info.pdf]

# 1 Supplementary information

2

## 3 Paleo-Eskimo genetic legacy across North America

4 Pavel Flegontov, N. Ezgi Altınışık, Piya Changmai, Nadin Rohland, Swapan Mallick, Nicole  
5 Adamski, Deborah A. Bolnick, Nasreen Broomandkhoshbacht, Francesca Candilio, Brendan J.  
6 Culleton, Olga Flegontova, T. Max Friesen, Choongwon Jeong, Thomas K. Harper, Denise  
7 Keating, Douglas J. Kennett, Alexander M. Kim, Thiseas C. Lamnidis, Ann Marie Lawson, Iñigo  
8 Olalde, Jonas Oppenheimer, Ben A. Potter, Jennifer Raff, Robert A. Sattler, Pontus Skoglund,  
9 Kristin Stewardson, Edward J. Vajda, Sergey Vasilyev, Elizaveta Veselovskaya, M. Geoffrey  
10 Hayes, Dennis H. O'Rourke, Johannes Krause, Ron Pinhasi, David Reich, Stephan Schiffels

11

## 12 CONTENTS

|    |                                                                               |           |
|----|-------------------------------------------------------------------------------|-----------|
| 13 | <b>Supplementary tables</b>                                                   | <b>2</b>  |
| 14 | <b>SI 1. Description of archaeological sites</b>                              | <b>4</b>  |
| 15 | <b>SI 2. Radiocarbon dating</b>                                               | <b>9</b>  |
| 16 | <b>SI 3. Ancient DNA isolation and sequencing</b>                             | <b>12</b> |
| 17 | <b>SI 4. Principal component analysis and outlier removal</b>                 | <b>16</b> |
| 18 | <b>SI 5. Exhaustive analysis of ancestry streams in small population sets</b> | <b>18</b> |
| 19 | <b>SI 6. Haplotype sharing statistics</b>                                     | <b>23</b> |
| 20 | <b>SI 7. Admixture inference with <i>GLOBETROTTER</i></b>                     | <b>28</b> |
| 21 | <b>SI 8. Rare allele sharing statistics</b>                                   | <b>33</b> |
| 22 | <b>SI 9. Demographic modeling with <i>Rarecoal</i></b>                        | <b>41</b> |
| 23 | <b>SI 10. Admixture graph modeling using <i>qpGraph</i></b>                   | <b>56</b> |
| 24 | <b>SI 11. Additional results on Aleutian population history</b>               | <b>67</b> |
| 25 | <b>SI 12. Dating admixture events using <i>ALDER</i></b>                      | <b>70</b> |
| 26 | <b>SI 13. Overview of the Dene-Yeniseian linguistic hypothesis</b>            | <b>72</b> |
| 27 | <b>Supplementary Discussion</b>                                               | <b>80</b> |

28

29 **Supplementary tables**

30

31 **Supplementary Table 1.** Summary of genome-wide data from 48 newly reported ancient  
32 individuals.

33 Notes:

34 \* based on being a father or son of I5319 at the same site who has a calibrated radiocarbon date

35 \*\* based on being a 2nd to 3rd degree relative of I5319 at the same site who has a calibrated radiocarbon date

36 \*\*\* context from 16 other dates at the same site

37

38 **Supplementary Table 2.** Reservoir-adjusted radiocarbon calibrations and stable isotope  
39 data for 46 ancient skeletal samples analyzed in this study. Average calibrated ages (Cal BP,  
40  $\mu$ ) and their 95% confidence intervals are shown (CalBP,  $2\sigma$ ).

41

42 **Supplementary Table 3.** Information on newly genotyped present-day individuals.

43

44 **Supplementary Table 4.** Composition of the genomic and SNP array datasets used in this  
45 study. Individual counts correspond to dataset versions after removal of outliers, relatives,  
46 and ancient samples with a high percentage of missing data, but prior to a more stringent  
47 filtering applied to the datasets used for  $f_4$ -statistics, for *qpWave*, and for *qpAdm* analyses  
48 (see the Methods). Meta-populations are abbreviated as follows: Paleo-Eskimos (P-E),  
49 Eskimo-Aleut speakers and ancient Neo-Eskimos (E-A), Chukotko-Kamchatkan speakers (C-  
50 K), proto-Paleo-Eskimos (PPE, i.e. groups having uncertain position within the C-K/E-A/P-E  
51 clade), Na-Dene speakers (mostly Athabaskans, ATH), Northern First Peoples (NAM),  
52 Southern First Peoples (SAM), Basal First Peoples (BAM), West Siberians (WSIB), East  
53 Siberians (ESIB), Southeast Asians (SEA), Europeans (EUR), Africans (AFR). Shotgun  
54 sequencing data were generated in this study for one ancient Aleut individual (I0719 or  
55 378620) and one ancient Athabaskan individual (I5319 or MT-1) or taken from three  
56 published sources: the Simons Genome Diversity Project (Mallick et al. 2016), Raghavan et  
57 al. (2015), and Moreno-Mayar et al. (2018). Two SNP array datasets were used: based on  
58 the HumanOrigins array and on Illumina arrays. HumanOrigins data were taken from  
59 Mathieson et al. (2015) and Jeong et al. (2019, in press) or generated in this study for  
60 Alaskan Iñupiat and West Siberians (Enets, Kets, Nganasans, and Selkups). Illumina data  
61 were taken from the following sources: Li et al. 2008, Behar et al. 2010, Rasmussen et al.  
62 2010, Fedorova et al. 2013, Raghavan et al. 2014a, 2014b, 2015, Verdu et al. 2014,  
63 Kushniarevich et al. 2015. Genome-wide targeted enrichment data were generated in this  
64 study using the 1240K SNP panel (Fu et al. 2015) for 48 ancient individuals (11 Aleuts, 3  
65 Northern Athabaskans, 21 Neo-Eskimos of the Old Bering Sea culture, one Middle Dorset  
66 Paleo-Eskimo, and 12 individuals from the Ust'-Belaya site on the Angara river), and merged  
67 with both SNP array datasets. Before the merging step, the following low-coverage samples  
68 were removed: 5 ancient Aleuts, 2 Neo-Eskimos (one from the Ekven and another from the  
69 Uelen site), and 3 Ust'-Belaya Angara individuals. One ancient Athabaskan sample was  
70 removed as a first-degree relative of another sample.

71 Notes:

72 \* The Dakelh population was referred to as Athabaskan in Rasmussen et al. (2010) and as  
73 'Northern Athabaskan 1' or simply Athabaskan in Raghavan et al. (2015).

74 \*\* The Caucasian (CAU), Middle Eastern (ME), South Asian (SAS), and Australo-Melanesian  
75 (OCE) meta-populations were included in the HumanOrigins dataset, but were not used for  
76 most analyses except for *ADMIXTURE*.

77

78 **Supplementary Table 5.** Details of datasets used in this study.

79 Notes:

80 \* transitions were removed in this dataset version

81 \*\* all individuals had missing rates below the threshold, except for the Middle Dorset  
82 individual having the missing rate of 0.89-0.90

83 \*\*\* rare variants occurring from 2 to 5 times in reference populations (AFR, EUR, SEA, SIB,  
84 C-K)

85 ^ listing only segregating sites among the 9 populations analyzed with *Rarecoal*. The total  
86 number of sites analyzed is 14,740,571, as in the rare allele sharing analysis

87 ^^ analyzed as 9 meta-populations and 3 ancient genomes mapped on the tree

88

89 **Supplementary Table 6.** Z-scores and site counts for  $f_4$ -statistics ( $American_i$ ,  $Half A$ ,  $American_j$ ;  
90  $American_i$ ,  $Half B$ ,  $Dai$ ). Statistics were calculated for 6 datasets (HumanOrigins, 1240K,  
91 Illumina, with or without transitions), and percentage of significantly positive  $f_4$ -statistics ( $Z$   
92  $> 3$ ) is shown for each dataset version.

93

94 *References (for Supplementary tables)*

- 95 1000 Genomes Project Consortium. A global reference for human genetic variation. *Nature* **526**, 68–74 (2015).  
96 Behar, D. M. *et al.* The genome-wide structure of the Jewish people. *Nature* **466**, 238–242 (2010).  
97 Fedorova, S. A. *et al.* Autosomal and uniparental portraits of the native populations of Sakha (Yakutia):  
98 implications for the peopling of Northeast Eurasia. *BMC Evol. Biol.* **13**, 127 (2013).  
99 Fu, Q. *et al.* An early modern human from Romania with a recent Neanderthal ancestor. *Nature* **524**, 216–219  
100 (2015).  
101 Jeong, C. *et al.* Characterizing the genetic history of admixture across inner Eurasia. *Nature Ecology and*  
102 *Evolution*, in press (2019).  
103 Kushniarevich, A. *et al.* Genetic heritage of the Balto-Slavic speaking populations: A synthesis of autosomal,  
104 mitochondrial and Y-chromosomal data. *PLoS ONE* **10**, e0135820 (2015).  
105 Li, J. Z. *et al.* Worldwide human relationships inferred from genome-wide patterns of variation. *Science* **319**,  
106 1100–1104 (2008).  
107 Mallick, S. *et al.* The Simons Genome Diversity Project: 300 genomes from 142 diverse populations. *Nature*  
108 **538**, 201–206 (2016).  
109 Mathieson, I. *et al.* Genome-wide patterns of selection in 230 ancient Eurasians. *Nature* **528**, 499–503 (2015).  
110 Moreno-Mayar, J. V. *et al.* Terminal Pleistocene Alaskan genome reveals first founding population of Native  
111 Americans. *Nature* **553**, 203–207 (2018).  
112 Raghavan, M. *et al.* The genetic prehistory of the New World Arctic. *Science* **345**, 1255832 (2014a).  
113 Raghavan, M. *et al.* Upper Palaeolithic Siberian genome reveals dual ancestry of Native Americans. *Nature* **505**,  
114 87–91 (2014b).  
115 Raghavan, M. *et al.* Genomic evidence for the Pleistocene and recent population history of Native Americans.  
116 *Science* **349**, 1–20 (2015).  
117 Rasmussen, M. *et al.* Ancient human genome sequence of an extinct Palaeo-Eskimo. *Nature* **463**, 757–762  
118 (2010).  
119 Verdu, P. *et al.* Patterns of admixture and population structure in native populations of northwest North  
120 America. *PLoS Genet.* **10**, e1004530 (2014).  
121

## 122 **Supplementary Information section 1**

### 123 **Description of archaeological sites**

124

#### 125 **1.1 Ancient Eastern Aleutian Islanders**

126 The skeletal samples from the eastern Aleutians were selected from curated collections at  
127 the Smithsonian Institution by M. Geoffrey Hayes, who was gloved, sleeved, and masked at  
128 all times to prevent self-contamination of the samples. All samples were small, fragmentary  
129 ribs free of pathological lesions and were immediately placed in sterile ziplock bags (Hayes  
130 2002) for transport to the lab for analysis.

131 The remains were excavated or collected by Aleš Hrdlička in the late 1930s. The  
132 geographic locations of the material are burial caves on Shiprock Island (northeast of Umnak  
133 Island), and Kagamil, one of the sacred Islands of the Four Mountains, immediately west of  
134 Umnak (Extended Data Table 1). The third site providing samples for molecular analysis is  
135 Chaluka, a deep midden site on Umnak adjacent to the contemporary village of Nikolski.

136 For the present study, the samples available for analysis included six individuals from  
137 Kagamil, with three osteologically determined to be female, one as probably female (later  
138 identified genetically as a male), and two as male. As reported by Brenner Coltrain et al.  
139 (2006), these six Kagamil samples exhibit a calibrated age range of 479 – 596 years before  
140 present (calBP). The single individual from Shiprock was identified as a male with an age of  
141 749 calBP. Finally, four individuals from the Chaluka site at Nikolski (three males and one  
142 female according to genetic data) exhibited an age range of 702 – 2,305 calBP. In this study,  
143 the dates were recalibrated (Supplementary Table 1 and 2) using an updated marine  
144 reservoir correction as described in Supplementary Information section 2.

145 Based on cranial metrics, Hrdlička (1945) postulated that the mummified remains  
146 from the burial caves on Kagamil and Shiprock represented immediate ancestors of modern  
147 Aleut people who had replaced an earlier population of ‘Pre-’ or ‘Paleo-Aleuts’ about a  
148 millennium ago. He viewed the remains at Chaluka as representatives of this earlier  
149 occupation of the Islands.

150 Although Hrdlička (1945) considered the ‘Paleo-Aleuts’ to be older than ‘Neo-Aleuts’,  
151 with only the latter ancestral to modern Aleut people following a replacement event around  
152 1,000 years ago, direct dating of the ancient remains (Brenner Coltrain, et al. 2006) clearly  
153 established that while all individuals recovered from Chaluka were ‘Paleo-Aleuts’ by  
154 Hrdlička’s cranial metric criteria, they coexisted with ‘Neo-Aleuts’ for several hundred years  
155 following the appearance of the latter at about 1,000 calBP. Thus, the strict replacement  
156 model of Hrdlička’s was untenable and the prehistory of peoples of the Aleutian chain, at  
157 least in the east, proved to be more complex than previously thought (Smith et al. 2009).

158 Molecular characterization of the ancient Aleut individuals was conducted following  
159 consultations with and permissions from local communities and authorities, including the  
160 Chaluka Corporation, the Aleut Corporation, and the Aleutians Pribilof Islands Association.

161

#### 162 *References (for this section)*

- 163 Brenner Coltrain, J. B., Hayes, M.G. & O’Rourke D.H. Hrdlička’s Aleutian population-replacement hypothesis. A  
164 radiometric evaluation. *Curr. Anthropol.* **47**, 537–548 (2006).  
165 Hayes, M. G. Paleogenetic assessments of human migration and population replacement in North American



166 Arctic prehistory. Doctoral Dissertation, University of Utah (2002).  
167 Hrdlička, A. *The Aleutian and Commander Islands and their inhabitants*. Philadelphia: Wistar Institute of  
168 Anatomy and Biology (1945).  
169 Smith, S. *et al.* Inferring population continuity versus replacement with aDNA: A cautionary tale from the  
170 Aleutian Islands. *Hum. Biol.* **81**, 19–38 (2009).

171

## 172 **1.2 Ancient Northern Athabaskans**

173 The ancient Athabaskan population in this study is derived from three individuals found  
174 intermingled in a non-burial context in the riparian zone of the upper Kuskokwim river. Tochak  
175 is the Athabaskan place-name for the area around the modern mixed ethnic community of  
176 McGrath, southwest Interior Alaska. Known as the Tochak McGrath Discovery, the three  
177 individuals were buried in overbank sediments that also feature unassociated buried organic  
178 bands with terrestrial and aquatic fauna, hearth matrix, flaked stone and bone artifacts. The  
179 human remains could not be linked stratigraphically to the surrounding cultural occupation  
180 features. We genetically determined the three individuals to be successive generations of  
181 consanguineous relatives: 30-40 year-old male (MT-1), 19-20 year-old male (MT-2), and 2-3  
182 year old female (MT-3) (Extended Data Table 1). The genetic analysis indicates a father-son  
183 relationship for MT-1 / MT-2, a grandfather-granddaughter relationship for MT-1 / MT-3, and  
184 an uncle-niece relationship for MT-2 / MT-3. To reduce correlation in the genetic sequences,  
185 only individuals MT-1 and MT-3 were selected for downstream genetic analyses. Nearly  
186 complete skeletal representation and articulation pattern of all three individuals in massive  
187 sand deposits suggest that these individuals died together of exposure and were buried by  
188 overbank sedimentation.

189 Soon after the time of discovery, a tripartite agreement was reached for scientific  
190 analysis between the McGrath Native Village Council (the federal recognized Alaska Native  
191 tribe), MTNT Ltd. (consortium of Alaska Native Claims Settlement Act village corporations) and  
192 Tanana Chiefs Conference (the regional non-profit consortium of 37 federally recognized  
193 Athabaskan Tribes and Alaskan Native associations in the Yukon and Kuskokwim river basins in  
194 Interior Alaska). R.A. Sattler has facilitated community-based research, collaboration with  
195 academic institutions, tribal consultation, public outreach and further data recovery at the  
196 Tochak discovery locale (Sattler *et al.* 2013).

197

### 198 *References (for this section)*

199 Sattler, R. A. *et al.* Tochak McGrath discovery: Precontact human remains in the Upper Kuskokwim River region of  
200 interior Alaska. *Alaska J. Anthropol.* **11**, 185–186 (2013).

201

## 202 **1.3 Early Neo-Eskimos (Old Bering Sea culture)**

203 Four and 17 individuals buried at neighboring Uelen and Ekven cemeteries, respectively,  
204 were sequenced in this study (Extended Data Table 1). These cemeteries of the Old Bering  
205 Sea (Drevneberingomorskaya) culture are located on the Chukotka Peninsula. The Uelen  
206 burial ground is separated by only 170 m from the present-day settlement Uelen on the  
207 coast of the Chukchi Sea, and the Ekven burial ground is about 40 km away. The site was  
208 discovered in 1955 by D. A. Sergeev, and its further excavation was carried out by the  
209 Institute of Ethnography of the Academy of Sciences of the USSR (details are reported in  
210 Levin & Sergeev 1964, Dikov 1967, Arutyunov & Sergeev 1969).

211 Both sites represent burial grounds of the Old Bering Sea culture of sea mammal  
212 hunters and fishers of the Arctic zone of Siberia and North America. This culture is related to  
213 others in the Bering Straits region that partially overlap in time (1,700-1,000 calBP): Okvik,  
214 Punuk, and Birnik, collectively (with the later related Thule tradition) termed the Northern  
215 Maritime tradition (Collins 1964). The Old Bering Sea stage is the earliest in development of  
216 this cultural tradition and is dated to between ~2,300-1,300 calBP (Arutyunov and Sergeev  
217 1975, Gerlach and Mason 1992) with evidence for continuity with the later Okvik, Punuk,  
218 and Birnik cultures (Arutyunov and Sergeev 1969, Gerlach and Mason 1992, Bronshtein et  
219 al. 2016, Mason 2016).

220 Mortuary behavior at the Ekven burial ground (189 burials) is more variable than  
221 that in other cemeteries of this culture. The buried were laid not only in an extended  
222 position, but also in a curled position, and there are numerous paired and group burials.  
223 Human remains from the Uelen and Ekven burial grounds provide an important source of  
224 data for the bioanthropology of Old Bering Sea culture individuals (Levin & Sergeev 1964,  
225 Debets 1975). Odontological materials from the Ekven burial ground, and to a lesser extent  
226 from Uelen, are very similar to those of present-day Eskimos (especially from Alaska) (Zubov  
227 1969).

228 According to all cultural traits studied, the Ekven and Uelen ancient populations  
229 were extremely similar. Which is quite natural, since the distance between the two sites  
230 does not exceed 35-40 kilometers. Nevertheless, even with such a close neighborhood  
231 between the two burial grounds, there are some differences.

232 This difference is observed, for example, in the ratio of the "x" and "y" harpoon tips.  
233 According to the classification principles by H. Collins (Collins 1964), if the tip is equipped  
234 with blades located in the same plane with a hole for the line, this is expressed by the letter  
235 "x", and if the planes are perpendicular, then the letter "y" is used. In Uelen, "x" harpoon  
236 tips prevail; in Ekven, on the contrary, the "y" series is more numerous. It was noted that  
237 the type "x" has advantages over the supposedly earlier type "y" (Arutyunov and Sergeev,  
238 1969).

239 Excavations in 1962-1967 at the Ekven cemetery, along with previously known  
240 burials in an elongated position, revealed a new type of burial that had not previously been  
241 found in ancient Eskimo burial grounds, namely, the appearance of skeletons in a crooked  
242 position. A considerable number of paired and collective burials was found at the Ekven  
243 cemetery. Some burials were disturbed by later graves (for example, burial 21). In some  
244 tombs scattered bones of other individuals were found in addition to the main skeleton.  
245 Presumably, such burials were made on the site of older burials, and the old skeletons were  
246 destroyed and fell with a backfill into new burials.

247

#### 248 *References (for this section)*

249 Arutyunov, S. A. & Sergeev, D. A. *Drevniye kul'tury aziaskih eskimosov: uelenskiy mogil'nik* [Ancient cultures of  
250 *Asian Eskimos: the Uelen burial ground*]. Moscow: Nauka (1969).

251 Arutyunov, S. A. & Sergeev, D. A. *Problemy etnicheskoy istorii Beringomorya: ekvenskiy mogil'nik* [Problems of  
252 *the ethnic history of the Bering Sea region: the Ekven burial ground*]. Moscow: Nauka (1975).

253 Bronshtein, M. M., Dneprovsky, K. A. & Savintsky, A. B. Ancient Eskimo cultures of Chukotka. *The Oxford*  
254 *Handbook of the Prehistoric Arctic*, ed. Friesen, T. M., Mason, O. K. New York: Oxford University Press.  
255 469-488 (2016).

256 Collins, H. B. The Arctic and Subarctic. *Prehistoric Man in the New World*, ed. Jennings, J. D. & Norbeck, E.  
257 Chicago: University of Chicago Press. 85-114 (1964).

258 Debets, G. F. Paleontologicheskiye materialy iz drevneberingomorskih mogil'nikov Uelen i Ekven

259 [Paleoanthropological materials from the Old Bering Sea burial grounds Uelen and Ekven]. *Problemy*  
260 *etnicheskoy istorii Beringomorya: ekvenskiy mogil'nik* [Problems of the ethnic history of the Bering Sea  
261 *region: the Ekven burial ground*], ed. Arutyunov, S. A. & Sergeyev, D. A. Moscow: Nauka. 198 (1975).  
262 Dikov, N. N. Uelenskiy mogil'nik po dannym raskopok 1956, 1958 i 1963 gg [The Uelen burial ground according  
263 to excavations in 1956, 1958 and 1963]. *Istoriya i kul'tura narodov Severa Dal'nego Vostoka* [History and  
264 *culture of the peoples of the northern Far East*], *Trudy SVKNII SO AN SSSR, vol. 17*. Moscow: Nauka (1967).  
265 Gerlach, C. & Mason, O. K. Calibrated radiocarbon dates and cultural interaction in the Western Arctic. *Arctic*  
266 *Anthropol.* **29**, 54–81 (1992).  
267 Levin, M. G. & Sergeyev, D. A. Drevniye mogil'niki Chukotki i nekotorye aspekty eskimoskoy problemy  
268 [Ancient burial grounds in Chukotka and some aspects of the Eskimo problem]. *Doklady na VII*  
269 *Mezhdunarodnom kongresse antropologicheskikh i etnograficheskikh nauk*. Moscow (1964).  
270 Mason, O. K. The Old Bering Sea florescence about Bering Strait. *The Oxford Handbook of the Prehistoric Arctic*,  
271 ed. Friesen, T. M., Mason, O. K. New York: Oxford University Press. 417–442 (2016).  
272 Zubov, A. A. Antropologicheskii analiz cherepykh seriy iz Ekvenskogo i Uelenskogo mogil'nikov  
273 [Anthropological analysis of cranial series from the Ekven and Uelen burial grounds]. *Drevniye kul'tury*  
274 *aziatskikh eskimosov: uelenskiy mogil'nik* [Ancient cultures of Asian Eskimos: the Uelen burial ground], ed.  
275 Arutyunov, S. A. & Sergeyev, D. A. Moscow: Nauka (1969).

276

#### 277 **1.4 The Ust'-Belaya site on the Angara river**

278 The Ust'-Belaya burial ground (Ust-Belaya II - Shumilikha) is located on the right bank of the  
279 Belaya River at the confluence with the Angara River. This is burial ground is unique not only  
280 for the Angara basin and the Baikal region, but also for Eastern Siberia because of burials in  
281 a sitting position. Separate burials of such a type and small clusters of them are found  
282 throughout Eastern Siberia, particularly in Transbaikalia and Mongolia, but such a large  
283 necropolis has not been found anywhere. In addition, in an eroded floodplain burials of  
284 another type were found: lying, in birch bark, and with partial cremation (Gerasimova  
285 1981).

286

#### 287 *References (for this section)*

288 Gerasimova, M. M. Cherepa iz II Ust'-Bel'skogo mogil'nika (Shumilikha) [Skulls from Ust'-Belaya II (Shumilikha)  
289 burial ground]. *Bronzovy vek Priangarya* [The Bronze Age in the Angara basin]. Irkutsk (1981).

290

#### 291 **1.5 The Dorset Period of the Paleo-Eskimo tradition**

292 The Dorset period of the Paleo-Inuit (Paleo-Eskimo) tradition in the Eastern North American  
293 Arctic is represented by a sample (I10427, NiNg-1) from the Buchanan site near Cambridge Bay,  
294 Victoria Island, Nunavut, Canada. Buchanan was originally excavated by Taylor (1967);  
295 renewed excavation by Friesen in 2007 yielded the sample described here. It is an adult left  
296 lower 3rd molar with heavy wear. This tooth was recovered from a depth of 15 cm below  
297 surface level in a warm-season dwelling. Artifacts from this tent ring are consistent with the  
298 Middle Dorset period, with no evidence of mixing or intrusive artifacts. The seven diagnostic  
299 harpoon heads are all of the Middle Dorset Frobisher Grooved type. The sample was previously  
300 subjected to shallow shotgun sequencing (0.004x coverage) and radiocarbon dating (Raghavan  
301 et al. 2014). The radiocarbon date has been recalibrated in this study to 1,900 – 1,610 calBP  
302 using a different marine reservoir correction (see section 2). The previously published  
303 calibrated date was older: 2,182 – 2,123 calBP (Raghavan et al. 2014).

304 The Middle Dorset specimen was recovered as part of a collaborative project initiated  
305 by the Kitikmeot Heritage Society (KHS) of Cambridge Bay, Nunavut. Sampling of the specimen  
306 for DNA, AMS dating, and isotopic analysis was discussed with the KHS before the research

307 occurred, and specific permission for this analysis was received from the Nunavut Government  
308 via a destructive analysis request. This latter permission involved consultation with the Inuit  
309 Heritage Trust, a Nunavut-wide body dedicated to the preservation, enrichment, and  
310 protection of Inuit Cultural Heritage.

311

312 *References (for this section)*

313 Raghavan, M. *et al.* The genetic prehistory of the New World Arctic. *Science* **345**, 1255832 (2014).

314 Taylor, W. E. Summary of archaeological field work on Banks and Victoria Islands, Arctic Canada, 1965. *Arctic*  
315 *Anth.* **4**, 221–243 (1967).

316

317 **1.6 Alaskan Iñupiat**

318 Iñupiat samples in this study were collected, along with genealogical records and participant  
319 surveys, by M. Geoffrey Hayes and Jennifer A. Raff from the communities of Atqasuk,  
320 Anaktuvuk Pass, Utqiagvik (formerly known as Barrow), Kaktovik, Nuiqsut, Point Hope, Point  
321 Lay, and Wainwright between 2008-2010 as described in Raff *et al.* (2015). This project was  
322 begun at the suggestion of an Elder in Utqiagvik to complement ancient DNA work on burial  
323 populations in the region, and was approved by Northwestern University's Institutional  
324 Review Board, after consultation with the Ukpeagvik Iñupiat Corporation, the Native Village  
325 of Barrow, and Senior Advisory Council of Barrow (Elders). Of the 181 samples collected, 35  
326 individuals who consented to have their DNA used for ancestry research were selected for  
327 inclusion in this study to represent a diversity of mitochondrial haplogroups and geographic  
328 origins (reported in Raff *et al.* 2015) and to represent both sexes in as close to equal  
329 proportions as possible. During the outlier removal procedure described in the Methods  
330 section, 20 individuals with minimal admixture from outside populations were selected for  
331 downstream analyses.

332

333 *References (for this section)*

334 Raff, J. A. *et al.* Mitochondrial diversity of Iñupiat people from the Alaskan North Slope provides evidence for the  
335 origins of the Paleo- and Neo-Eskimo peoples. *Am. J. Phys. Anthropol.* **157**, 603–614 (2015).

336

## 337 **Supplementary Information section 2**

### 338 **Radiocarbon dating**

339

340 We report 11 new direct AMS  $^{14}\text{C}$  bone dates from the Penn State Accelerator Mass  
341 Spectrometer laboratory (PSUAMS) and recalibrate 13 previously published radiocarbon  
342 dates from three other AMS radiocarbon laboratories (Arizona [AA]: 11; Beta Analytic  
343 [Beta]: 1; UC Irvine [UCIAMS]: 1; see Supplementary Table 2 and Fig. S2.1). Bone preparation  
344 and quality control methods for the AA and Beta samples are described elsewhere (Brenner  
345 Coltrain et al. 2006, Halffman et al. 2015).

346

#### 347 **2.1 Old Bering Sea and Ust'-Belaya Angara samples**

348 At PSUAMS and UCIAMS, bone collagen for  $^{14}\text{C}$  and stable isotope analyses and was  
349 extracted and purified using a modified Longin method with ultrafiltration (Kennett et al.  
350 2017). Bones were initially cleaned of adhering sediment and the exposed surfaces were  
351 removed with an X-acto blade. Samples (200–400 mg) were demineralized for 24–36 h in  
352 0.5N HCl at 5 °C followed by a brief (<1 h) alkali bath in 0.1N NaOH at room temperature to  
353 remove humates. The residue was rinsed to neutrality in multiple changes of Nanopure  $\text{H}_2\text{O}$ ,  
354 and then gelatinized for 12 h at 60 °C in 0.01N HCl. The resulting gelatin was lyophilized and  
355 weighed to determine percent yield as a first evaluation of the degree of bone collagen  
356 preservation. Rehydrated gelatin solution was pipetted into pre-cleaned Centriprep  
357 (McClure et al. 2010) ultrafilters (retaining 430 kDa molecular weight gelatin) and  
358 centrifuged 3 times for 20 min, diluted with Nanopure  $\text{H}_2\text{O}$  and centrifuged 3 more times for  
359 20 min to desalt the solution. Carbon and nitrogen concentrations and stable isotope ratios  
360 were measured at the Yale Analytical and Stable Isotope Center with a Costech elemental  
361 analyzer (ECS 4010) and Thermo DeltaPlus analyzer. Sample quality was evaluated by %  
362 crude gelatin yield, %C, %N and C/N ratios before AMS  $^{14}\text{C}$  dating. C/N ratios for all 11  
363 samples fell between 3.14 and 3.32, indicating good collagen preservation (Van Klinken  
364 1999).

365 Collagen samples (~2.1 mg) were combusted for 3 h at 900 °C in vacuum-sealed  
366 quartz tubes with CuO and Ag wires. Sample  $\text{CO}_2$  was reduced to graphite at 550 °C using  $\text{H}_2$   
367 and a Fe catalyst, with reaction water drawn off with  $\text{Mg}(\text{ClO}_4)_2$  (Santos et al. 2004).  
368 Graphite samples were pressed into targets in Al cathodes and loaded on the target wheel  
369 for AMS analysis. The  $^{14}\text{C}$  ages were corrected for mass-dependent fractionation with  
370 measured  $\delta^{13}\text{C}$  values (Stuiver and Polach 1977) and compared with samples of Pleistocene  
371 whale bone (backgrounds, 48,000  $^{14}\text{C}$  BP), late Holocene bison bone (~1,850  $^{14}\text{C}$  BP), late AD  
372 1800s cow bone and OX-2 oxalic acid standards for calibration.

373

#### 374 **2.2 Northern Athabaskan (Tochak McGrath) samples**

375 Collagen removed from the femur of MT-1 (I5319; the eldest individual) yielded a radiocarbon  
376 age of  $1170 \pm 30$  BP (AMS lab code Beta-337194). This age estimate provides an older limiting  
377 age on the time of death of the Tochak family. Isotopic analysis has determined relatively high  
378 carbon and nitrogen values on all three individuals that suggest a strong marine component to  
379 their diet (i.e., anadromous salmon) (Halffman et al. 2015).

380 The isotopic values suggest that the radiocarbon age on human collagen may over-

381 estimate the actual time of death, and the date was calibrated as described below. Given the  
382 direct age on MT-1 as a maximum limiting age, charcoal dates from matrix of two spatially  
383 separate hearths at the Tochak site provide a younger limiting age of around 350 years before  
384 present:  $320 \pm 30$  BP (465-300 calBP; AMS lab code Beta-333837) and  $380 \pm 30$  BP (505-320  
385 calBP; AMS lab code Beta-343499).

386

### 387 **2.3 Middle Dorset sample**

388 The Middle Dorset tooth from the Buchanan site yielded a direct AMS date of  $2,325 \pm 15$  BP  
389 (UCIAMS 86237). When assuming 90% marine contribution to diet, and using the  
390 geographically closest  $\Delta R$  of  $232 \pm 30$ , from Bathurst Inlet (Coulthard et al 2010), the date  
391 calibrates to 1,900-1,610 calBP (95.4% confidence). Two radiocarbon dates have also been  
392 obtained for caribou bone from the same feature:  $1,790 \pm 15$  BP (1,809-1,627 calBP, 95.4%  
393 confidence, UCIAMS 76625), and  $1,725 \pm 15$  BP (1,696-1,568 calBP, 95.4% confidence,  
394 UCIAMS 76626). These radiocarbon dates are consistent with the direct tooth date, and  
395 with other Middle Dorset dates from the region (Friesen 2016).

396

### 397 **2.4 Calibration of radiocarbon dates**

398 All  $^{14}\text{C}$  ages were calibrated with OxCal version 4.2.3 (Bronk Ramsey 2013) using mixtures  
399 of the northern hemisphere terrestrial calibration curve (IntCal13) and the marine curve  
400 (Marine13; Reimer et al. 2013). Marine contribution was estimated using stable carbon and  
401 nitrogen isotopes and was assigned values of 0% for far inland contexts (Ust'-Belaya  
402 Angara), 50% for inland samples influenced by anadromous salmon (Tochak McGrath), and  
403 90% for coastal samples (all other sites). The geographical context of sites is reflected in the  
404 reported  $\delta^{15}\text{N}$  measurements, which range from 11.0 to 15.7‰ (Ust'-Belaya), 15.2‰  
405 (Tochak McGrath), and 18.3 to 22.3‰ (coastal sites).

406 For dates from Alaska and Chukotka we used a  $\Delta R$  of  $455 \pm 81$  (Misarti and Maschner  
407 2015), which is based on an average for this region (Reimer and Reimer 2001). For a single  
408 date from Victoria Island in Nunavut (UCIAMS-86237) the nearest  $\Delta R$  value (Bathurst Inlet,  
409  $232 \pm 30$ ) was used (Coulthard et al. 2010). The reservoir-corrected dates are presented in  
410 Supplementary Table 2 and Fig. S2.1.

411

### 412 *References (for this section)*

- 413 Brenner Coltrain, J., et al. Hrdlička's Aleutian population-replacement hypothesis. A radiometric evaluation.  
414 *Curr. Anthropol.* **47**, 537–548 (2006).
- 415 Bronk Ramsey, C. OxCal 4.23 Online Manual [https://c14.arch.ox.ac.uk/oxcalhelp/hlp\\_contents.html](https://c14.arch.ox.ac.uk/oxcalhelp/hlp_contents.html) (2013).
- 416 Byers D. A. et al. 2011. Stable isotope chemistry, population histories and Late Prehistoric subsistence change  
417 in the Aleutian Islands. *J. Archaeol. Sci.* **38**, 183–196 (2011).
- 418 Coulthard, R. D. et al. New marine  $\Delta R$  values for Arctic Canada. *Quat. Geochronol.* **5**, 419–434 (2010).
- 419 Friesen, T. M. Middle Dorset communal structures on Victoria Island. *Open Arch.* **2**, 194–208 (2016).
- 420 Kennett, D. J. et al. Archaeogenomic evidence reveals prehistoric matrilineal dynasty. *Nat. Commun.* **8**, 14115  
421 (2017).
- 422 Halfman, C. M., Sattler, R. & Clark, J. L. Bone collagen stable isotope analysis of three late Holocene humans from  
423 Interior Alaska. *Am. J. Phys. Anthropol.* **156** (S60), 157 (2015).
- 424 McClure, S. B., García Puchol, O. & Culleton, B. J. AMS Dating of Human Bone from Cova De La Pastora: New  
425 Evidence of Ritual Continuity in the Prehistory of Eastern Spain. *Radiocarbon* **52**, 25–32 (2010).
- 426 Misarti, N. & Maschner, H. D. G. The Paleo-Aleut to Neo-Aleut transition revisited. *J. Anthropol. Archaeol.* **37**,  
427 67–84 (2015).

428 Raghavan, M. *et al.* The genetic prehistory of the New World Arctic. *Science* **345**, 1255832 (2014).  
 429 Reimer, P. J. *et al.* Intcal13 and Marine13 radiocarbon age calibration curves 0-50,000 years Cal Bp.  
 430 *Radiocarbon* **55**, 1869–1887 (2013).  
 431 Reimer, P. J. & Reimer, R. W. A marine reservoir correction database and on-line interface. *Radiocarbon* **43**,  
 432 461–463 (2001).  
 433 Santos, G. M. *et al.* Magnesium perchlorate as an alternative water trap in AMS graphite sample preparation:  
 434 A report on sample preparation at KCCAMS at the University of California, Irvine. *Radiocarbon* **46**, 165–  
 435 173 (2004).  
 436 Stuiver, M. & Polach, H. A. Reporting of C-14 Data-Discussion. *Radiocarbon* **19**, 355–363 (1977).  
 437 Van Klinken, G. J. Bone collagen quality indicators for palaeodietary and radiocarbon measurements. *J.*  
 438 *Archaeol. Sci.* **26**, 687–695 (1999).

439

440 **Fig. S2.1.** Plot of probability distributions for new AMS <sup>14</sup>C dates (PSUAMS results) and previously published  
 441 regional radiocarbon data (Brenner Coltrain *et al.* 2006; Byers *et al.* 2011; Halffman *et al.* 2015; Raghavan *et al.*  
 442 2014) with marine reservoir correction. Alaska and Chukotka  $\Delta R = 455 \pm 81$  (Misarti and Maschner 2015);  
 443 Victoria Island  $\Delta R = 232 \pm 30$  (Coulthard *et al.* 2010). No marine reservoir correction was applied to the Ust'-  
 444 Belaya Angara samples located in the Baikal region. The brackets below the calibrated distributions are the  
 445 68.2% (upper bracket) and 95.4% (lower bracket) credible intervals of the calibrated range.

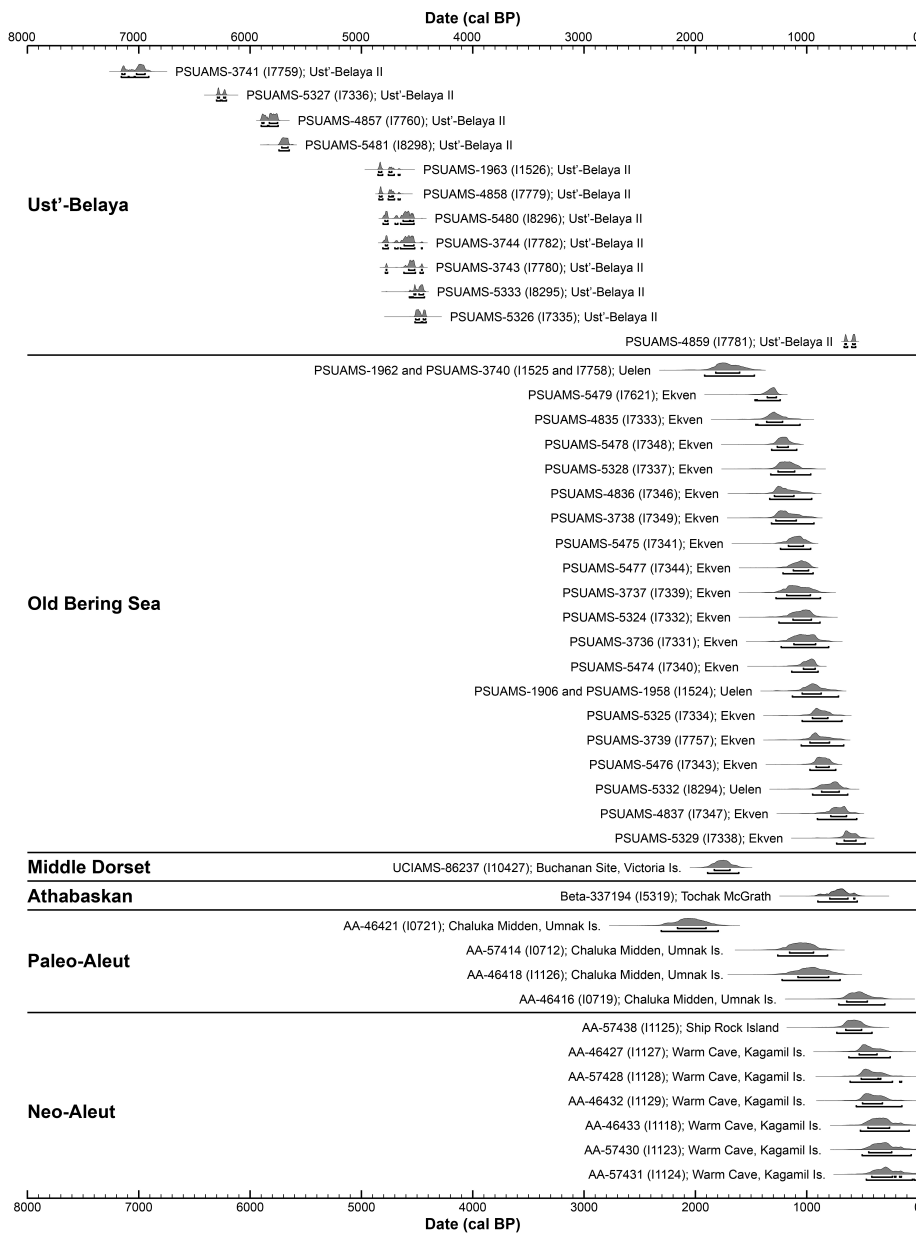

446

## 447 **Supplementary Information section 3**

### 448 **Ancient DNA isolation and sequencing**

449

#### 450 **3.1 Ancient DNA isolation**

451 Powder from skeletal remains was prepared in dedicated clean room facilities either at  
452 University College Dublin in Dublin Ireland (the samples from Siberia), or Harvard Medical  
453 School in Boston USA (the samples from North America). All subsequent DNA extraction,  
454 library preparation, target capture enrichment and Illumina sequencing was performed at  
455 Harvard Medical School in Boston (USA) (Table S3.1).

456 For tooth samples, after surface cleaning by fine sandblasting, the dentine area of roots  
457 and crowns was milled to obtain fine powder. For petrous samples or the cochlear region of  
458 the inner ear was extracted by sandblasting and subsequently milled into fine powder,  
459 respectively. In the case of the rib bones from the Aleutian Islanders, bones were cleaned at  
460 the surface with a sanding disk and fine powder was collected for DNA extraction by drilling  
461 into the cleaned area.

462 About 75 mg (+/- 9 mg) of powder was then used for DNA extraction following an  
463 established protocol by Dabney *et al.* (2013), with modifications as in Korlević *et al.* (2015);  
464 that is, the MinElute/Zymo funnel assembly was replaced by the funnel-column assembly from  
465 the Roche High Pure Viral Nucleic Acid Large Volume Kit. The final volume of DNA extract was  
466 90 µl.

467 A double-stranded barcoded Illumina library was prepared for each sample using the  
468 'partial UDG treatment' protocol (Rohland *et al.* 2015). For 3 libraries the settings were  
469 identical to the original publication, and for the remaining 55 libraries updated setting were  
470 used (see notes to Table S3.1).

471 After cleanup of the amplified libraries, we performed a screening step: a capture  
472 enrichment targeting the mitochondrial genome and additional nuclear loci (manuscript in  
473 preparation) following the procedure described in Maricic *et al.* (2010). After unique  
474 identification indices were added to each enriched library, we then sequenced the enrichment  
475 product together with the original libraries (also after addition of a unique index pair to each  
476 library) – shotgun, on an Illumina NextSeq 500 instrument for 2x 76 cycles and 2x 7cycles.

477 Nuclear data were produced by enriching the original short libraries for 1.24 million  
478 SNP loci following the protocol by Fu *et al.* 2015 (SNP information in Haak *et al.* 2015,  
479 Mathieson *et al.* 2015). For 3 libraries, enrichment reactions were performed on two separate  
480 bait pools with 390 thousand and 840 thousand targeted SNPs each. For the rest of the  
481 libraries, the two arrays were combined into a single pool targeting 1.24 million SNPs.  
482 Sequencing was performed on an Illumina NextSeq 500 instrument for 2x 76 cycles and 2x  
483 7cycles.

484 Samples I0719 (an ancient Aleutian Islander) and I5319 (an ancient Athabaskan) were  
485 both shotgun sequenced on a NextSeq 500 instrument for 2x76 cycles.

486

#### 487 *References (for this section)*

488 Dabney, J. *et al.* Complete mitochondrial genome sequence of a Middle Pleistocene cave bear reconstructed from  
489 ultrashort DNA fragments. *Proc. Natl. Acad. Sci. U. S. A.* **110**, 15758–15763 (2013).  
490 Fu, Q. An early modern human from Romania with a recent Neanderthal ancestor. *Nature* **524**, 216–219 (2015).



491 Haak, W. *et al.* Massive migration from the steppe was a source for Indo-European languages in Europe. *Nature*  
 492 **522**, 207–211 (2015).  
 493 Korlević, P. *et al.* Reducing microbial and human contamination in DNA extractions from ancient bones and teeth.  
 494 *Biotechniques* **59**, 87–93 (2015).  
 495 Maricic, T., Whitten, M. & Pääbo, S. Multiplexed DNA sequence capture of mitochondrial genomes using PCR  
 496 products. *PLoS One* **5**, e14004 (2010).  
 497 Mathieson, I. *et al.* Genome-wide patterns of selection in 230 ancient Eurasians. *Nature* **528**, 499–503 (2015).  
 498 Rohland, N. *et al.* Partial uracil-DNA-glycosylase treatment for screening of ancient DNA. *Philos. Trans. R. Soc.*  
 499 *Lond. B Biol. Sci.* **370**, 20130624 (2015).

500

501 **Table S3.1.** DNA extraction, library preparation and nuclear targeted enrichment. For most individuals, one library  
 502 per individuals was prepared and we here use the individual ID to identify the library as well.

503 <sup>a</sup> Dabney *et al.* 2013 with the addition of the funnel-column assembly from the Roche kit as in Korlević *et al.*  
 504 (2015), elution in 2x 45 µl.

505 <sup>b</sup> Dabney *et al.* 2013 using a smaller portion of lysate with a silica bead cleanup instead of silica based columns,  
 506 elution in 2x 15 µl.

507 <sup>1</sup> Rohland *et al.* (2015) with the following modifications: 1) the elution volume after the MinElute cleanup of the  
 508 ligation reaction was reduced from 20 µl to 16 µl; 2) the Fill-in reaction volume was reduced from 40 µl to 25 µl; 3)  
 509 the ThermoPol buffer was replaced by the Isothermal amplification buffer; 4) *Bst* polymerase, large fragment  
 510 (New England Biolabs), was replaced by *Bst* 2.0 Polymerase, large fragment (New England Biolabs); 5) PCR volume  
 511 was reduced from 400 µl to 100 µl.

512 <sup>2</sup> Rohland *et al.* (2015) with the following modifications: 1) the elution volume after the ligation reaction cleanup  
 513 was reduced from 20 µl to 16 µl; 2) the Fill-in reaction volume was reduced from 40 µl to 25 µl; 3) the ThermoPol  
 514 buffer was replaced by the Isothermal amplification buffer; 4) *Bst* polymerase, large fragment (New England  
 515 Biolabs), was replaced by *Bst* 2.0 Polymerase, large fragment (New England Biolabs); 5) PCR volume was reduced  
 516 from 400 µl to 100 µl; 5) the MinElute column cleanups were replaced with silica bead cleanups.

517

| Analysis ID | library components | sample type | powder produced in | powder used for extraction, mg | extraction protocol                    | extract used for library preparation, µl | library preparation                     | damage rate in the final nucleotide | nuclear capture protocol |
|-------------|--------------------|-------------|--------------------|--------------------------------|----------------------------------------|------------------------------------------|-----------------------------------------|-------------------------------------|--------------------------|
| I0712       | S0712.E1.L1        | bone (rib)  | Boston             | 74                             | Dabney <i>et al.</i> 2013 <sup>a</sup> | 30                                       | Rohland <i>et al.</i> 2015              | 1.5%                                | 390k + 840k              |
| I0719       | S0719.E1.L1        | bone (rib)  | Boston             | 68                             | Dabney <i>et al.</i> 2013 <sup>a</sup> | 30                                       | Rohland <i>et al.</i> 2015              | 1.4%                                | 390k + 840k              |
| I0721       | S0721.E1.L1        | bone (rib)  | Boston             | 74                             | Dabney <i>et al.</i> 2013 <sup>a</sup> | 30                                       | Rohland <i>et al.</i> 2015              | 2.5%                                | 390k + 840k              |
| I1118       | S1118.E1.L1        | bone (rib)  | Boston             | 67                             | Dabney <i>et al.</i> 2013 <sup>a</sup> | 30                                       | Rohland <i>et al.</i> 2015 <sup>1</sup> | 0.7%                                | 1240k                    |
| I1123       | S1123.E1.L1        | bone (rib)  | Boston             | 76                             | Dabney <i>et al.</i> 2013 <sup>a</sup> | 30                                       | Rohland <i>et al.</i> 2015 <sup>1</sup> | 2.7%                                | 1240k                    |
| I1124       | S1124.E1.L1        | bone (rib)  | Boston             | 75                             | Dabney <i>et al.</i> 2013 <sup>a</sup> | 30                                       | Rohland <i>et al.</i> 2015 <sup>1</sup> | 4.3%                                | 1240k                    |
| I1125       | S1125.E1.L1        | bone (rib)  | Boston             | 74                             | Dabney <i>et al.</i> 2013 <sup>a</sup> | 30                                       | Rohland <i>et al.</i> 2015 <sup>1</sup> | 2.0%                                | 1240k                    |
| I1126       | S1126.E1.L2        | bone (rib)  | Boston             | 74                             | Dabney <i>et al.</i> 2013 <sup>a</sup> | 3                                        | Rohland <i>et al.</i> 2015 <sup>2</sup> | 2.4%                                | 1240k                    |
| I1127       | S1127.E1.L1        | bone (rib)  | Boston             | 73                             | Dabney <i>et al.</i> 2013 <sup>a</sup> | 30                                       | Rohland <i>et al.</i> 2015 <sup>1</sup> | 1.5%                                | 1240k                    |
| I1128       | S1128.E1.L1        | bone (rib)  | Boston             | 73                             | Dabney <i>et al.</i> 2013 <sup>a</sup> | 30                                       | Rohland <i>et al.</i> 2015 <sup>1</sup> | 2.7%                                | 1240k                    |
| I1129       | S1129.E1.L1        | bone (rib)  | Boston             | 73                             | Dabney <i>et al.</i> 2013 <sup>a</sup> | 30                                       | Rohland <i>et al.</i> 2015 <sup>1</sup> | 2.1%                                | 1240k                    |
| I1524       | S1524.E1.L1        | molar       | Dublin             | 68                             | Dabney <i>et al.</i> 2013 <sup>a</sup> | 30                                       | Rohland <i>et al.</i> 2015 <sup>1</sup> | 1.9%                                | 1240k                    |
| I1525       | S1525.E1.L1        | molar       | Dublin             | 72                             | Dabney <i>et al.</i> 2013 <sup>a</sup> | 30                                       | Rohland <i>et al.</i> 2015 <sup>1</sup> | 2.2%                                | 1240k                    |
|             | S7758.E1.L1        | tooth       | Dublin             | 67                             | Dabney <i>et al.</i> 2013 <sup>a</sup> | 10                                       | Rohland <i>et al.</i> 2015 <sup>2</sup> | 1.6%                                | 1240k                    |
| I1526       | S1526.E1.L1        | molar       | Dublin             | 71                             | Dabney <i>et al.</i> 2013 <sup>a</sup> | 30                                       | Rohland <i>et al.</i> 2015 <sup>1</sup> | 3.8%                                | 1240k                    |
|             | S7778.E1.L1        | tooth       | Dublin             | 71                             | Dabney <i>et al.</i> 2013 <sup>a</sup> | 10                                       | Rohland <i>et al.</i> 2015 <sup>2</sup> | 2.4%                                | 1240k                    |
| I5319       | S5319.E1.L1        | petrous     | Boston             | 83                             | Dabney <i>et al.</i> 2013 <sup>a</sup> | 10                                       | Rohland <i>et al.</i> 2015 <sup>2</sup> | 6.4%                                | 1240k                    |
|             | S5319.E2.L1        | petrous     | Boston             | 28                             | Dabney <i>et al.</i> 2013 <sup>b</sup> | 10                                       | Rohland <i>et al.</i> 2015 <sup>2</sup> | 7.3%                                | 1240k                    |

|         |              |                   |        |    |                                        |    |                                         |      |       |
|---------|--------------|-------------------|--------|----|----------------------------------------|----|-----------------------------------------|------|-------|
|         | S5319.E2.L2  | petrous           | Boston | 28 | Dabney <i>et al.</i> 2013 <sup>b</sup> | 30 | Rohland <i>et al.</i> 2015 <sup>2</sup> | 8.0% | 1240k |
| I5320   | S5320.E1.L1  | petrous           | Boston | 75 | Dabney <i>et al.</i> 2013 <sup>a</sup> | 10 | Rohland <i>et al.</i> 2015 <sup>2</sup> | 4.0% | 1240k |
|         | S5320.E2.L1  | petrous           | Boston | 16 | Dabney <i>et al.</i> 2013 <sup>b</sup> | 10 | Rohland <i>et al.</i> 2015 <sup>2</sup> | 4.6% | 1240k |
|         | S5320.E2.L2  | petrous           | Boston | 16 | Dabney <i>et al.</i> 2013 <sup>b</sup> | 30 | Rohland <i>et al.</i> 2015 <sup>2</sup> | 5.0% | 1240k |
| I5321   | S5321.E1.L1  | petrous           | Boston | 66 | Dabney <i>et al.</i> 2013 <sup>a</sup> | 10 | Rohland <i>et al.</i> 2015 <sup>2</sup> | 1.0% | 1240k |
|         | S5321.E2.L1  | petrous           | Boston | 22 | Dabney <i>et al.</i> 2013 <sup>b</sup> | 10 | Rohland <i>et al.</i> 2015 <sup>2</sup> | 1.2% | 1240k |
|         | S5321.E2.L2  | petrous           | Boston | 22 | Dabney <i>et al.</i> 2013 <sup>b</sup> | 30 | Rohland <i>et al.</i> 2015 <sup>2</sup> | 1.5% | 1240k |
| I7331   | S7331.E1.L1  | molar             | Dublin | 75 | Dabney <i>et al.</i> 2013 <sup>a</sup> | 10 | Rohland <i>et al.</i> 2015 <sup>2</sup> | 1.5% | 1240k |
| I7332   | S7332.E1.L1  | molar             | Dublin | 75 | Dabney <i>et al.</i> 2013 <sup>a</sup> | 10 | Rohland <i>et al.</i> 2015 <sup>2</sup> | 2.1% | 1240k |
| I7333   | S7333.E1.L1  | molar             | Dublin | 75 | Dabney <i>et al.</i> 2013 <sup>a</sup> | 10 | Rohland <i>et al.</i> 2015 <sup>2</sup> | 1.4% | 1240k |
| I7334   | S7334.E1.L1  | molar             | Dublin | 68 | Dabney <i>et al.</i> 2013 <sup>a</sup> | 10 | Rohland <i>et al.</i> 2015 <sup>2</sup> | 0.9% | 1240k |
| I7335   | S7335.E1.L1  | molar             | Dublin | 64 | Dabney <i>et al.</i> 2013 <sup>a</sup> | 10 | Rohland <i>et al.</i> 2015 <sup>2</sup> | 3.2% | 1240k |
| I7336   | S7336.E1.L1  | molar             | Dublin | 57 | Dabney <i>et al.</i> 2013 <sup>a</sup> | 10 | Rohland <i>et al.</i> 2015 <sup>2</sup> | 3.4% | 1240k |
| I7337   | S7337.E1.L1  | molar             | Dublin | 58 | Dabney <i>et al.</i> 2013 <sup>a</sup> | 10 | Rohland <i>et al.</i> 2015 <sup>2</sup> | 1.2% | 1240k |
| I7338   | S7338.E1.L1  | molar             | Dublin | 74 | Dabney <i>et al.</i> 2013 <sup>a</sup> | 10 | Rohland <i>et al.</i> 2015 <sup>2</sup> | 0.6% | 1240k |
| I7339   | S7339.E1.L1  | molar             | Dublin | 75 | Dabney <i>et al.</i> 2013 <sup>a</sup> | 10 | Rohland <i>et al.</i> 2015 <sup>2</sup> | 1.6% | 1240k |
| I7340   | S7340.E1.L1  | molar             | Dublin | 75 | Dabney <i>et al.</i> 2013 <sup>a</sup> | 10 | Rohland <i>et al.</i> 2015 <sup>2</sup> | 1.1% | 1240k |
| I7341   | S7341.E1.L1  | molar             | Dublin | 75 | Dabney <i>et al.</i> 2013 <sup>a</sup> | 10 | Rohland <i>et al.</i> 2015 <sup>2</sup> | 1.8% | 1240k |
| I7342_d | S7342.E1.L1  | molar             | Dublin | 70 | Dabney <i>et al.</i> 2013 <sup>a</sup> | 10 | Rohland <i>et al.</i> 2015 <sup>2</sup> | 1.3% | 1240k |
| I7343   | S7343.E1.L1  | molar             | Dublin | 70 | Dabney <i>et al.</i> 2013 <sup>a</sup> | 10 | Rohland <i>et al.</i> 2015 <sup>2</sup> | 1.5% | 1240k |
| I7344   | S7344.E1.L1  | molar             | Dublin | 72 | Dabney <i>et al.</i> 2013 <sup>a</sup> | 10 | Rohland <i>et al.</i> 2015 <sup>2</sup> | 1.2% | 1240k |
| I7346   | S7346.E1.L1  | molar             | Dublin | 80 | Dabney <i>et al.</i> 2013 <sup>a</sup> | 10 | Rohland <i>et al.</i> 2015 <sup>2</sup> | 1.8% | 1240k |
| I7347   | S7347.E1.L1  | molar             | Dublin | 55 | Dabney <i>et al.</i> 2013 <sup>a</sup> | 10 | Rohland <i>et al.</i> 2015 <sup>2</sup> | 1.7% | 1240k |
| I7348   | S7348.E1.L1  | molar             | Dublin | 57 | Dabney <i>et al.</i> 2013 <sup>a</sup> | 10 | Rohland <i>et al.</i> 2015 <sup>2</sup> | 1.9% | 1240k |
| I7349   | S7349.E1.L1  | molar             | Dublin | 70 | Dabney <i>et al.</i> 2013 <sup>a</sup> | 10 | Rohland <i>et al.</i> 2015 <sup>2</sup> | 1.5% | 1240k |
| I7621   | S7621.E1.L1  | bone              | Dublin | 63 | Dabney <i>et al.</i> 2013 <sup>a</sup> | 10 | Rohland <i>et al.</i> 2015 <sup>2</sup> | 3.5% | 1240k |
| I7757   | S7757.E1.L1  | molar             | Dublin | 62 | Dabney <i>et al.</i> 2013 <sup>a</sup> | 10 | Rohland <i>et al.</i> 2015 <sup>2</sup> | 1.4% | 1240k |
| I7759   | S7759.E1.L1  | molar             | Dublin | 82 | Dabney <i>et al.</i> 2013 <sup>a</sup> | 10 | Rohland <i>et al.</i> 2015 <sup>2</sup> | 3.0% | 1240k |
| I7760   | S7760.E1.L1  | molar             | Dublin | 70 | Dabney <i>et al.</i> 2013 <sup>a</sup> | 10 | Rohland <i>et al.</i> 2015 <sup>2</sup> | 2.6% | 1240k |
| I7779   | S7779.E1.L1  | bone<br>(cranial) | Dublin | 63 | Dabney <i>et al.</i> 2013 <sup>a</sup> | 10 | Rohland <i>et al.</i> 2015 <sup>2</sup> | 2.3% | 1240k |
| I7780   | S7780.E1.L1  | molar             | Dublin | 67 | Dabney <i>et al.</i> 2013 <sup>a</sup> | 10 | Rohland <i>et al.</i> 2015 <sup>2</sup> | 1.8% | 1240k |
| I7781   | S7781.E1.L1  | molar             | Dublin | 66 | Dabney <i>et al.</i> 2013 <sup>a</sup> | 10 | Rohland <i>et al.</i> 2015 <sup>2</sup> | 3.0% | 1240k |
| I7782   | S7782.E1.L1  | molar             | Dublin | 62 | Dabney <i>et al.</i> 2013 <sup>a</sup> | 10 | Rohland <i>et al.</i> 2015 <sup>2</sup> | 3.3% | 1240k |
| I8294   | S8294.E1.L1  | bone<br>(phalanx) | Dublin | 75 | Dabney <i>et al.</i> 2013 <sup>a</sup> | 10 | Rohland <i>et al.</i> 2015 <sup>2</sup> | 2.6% | 1240k |
| I8295   | S8295.E1.L1  | bone<br>(cranial) | Dublin | 71 | Dabney <i>et al.</i> 2013 <sup>a</sup> | 10 | Rohland <i>et al.</i> 2015 <sup>2</sup> | 3.5% | 1240k |
| I8296   | S8296.E1.L1  | bone<br>(cranial) | Dublin | 68 | Dabney <i>et al.</i> 2013 <sup>a</sup> | 10 | Rohland <i>et al.</i> 2015 <sup>2</sup> | 4.8% | 1240k |
|         | S8297.E1.L1  | bone<br>(cranial) | Dublin | 68 | Dabney <i>et al.</i> 2013 <sup>a</sup> | 10 | Rohland <i>et al.</i> 2015 <sup>2</sup> | 3.7% | 1240k |
| I8298   | S8298.E1.L1  | bone<br>(cranial) | Dublin | 75 | Dabney <i>et al.</i> 2013 <sup>a</sup> | 10 | Rohland <i>et al.</i> 2015 <sup>2</sup> | 6.5% | 1240k |
|         | S8300.E1.L1  | bone<br>(cranial) | Dublin | 75 | Dabney <i>et al.</i> 2013 <sup>a</sup> | 10 | Rohland <i>et al.</i> 2015 <sup>2</sup> | 5.9% | 1240k |
| I10427  | S10427.E1.L2 | molar             | Boston | 73 | Dabney <i>et al.</i> 2013 <sup>a</sup> | 10 | Rohland <i>et al.</i> 2015 <sup>2</sup> | 3.1% | 1240k |

### 519 3.2 Bioinformatic processing

520 Raw sequencing data was generated on an Illumina NextSeq 500 instrument. For libraries  
521 captured against the set of 1.24 million nuclear SNPs, sample-identifying sequences (barcodes)  
522 were trimmed. Adapters were stripped and read pairs with at least 15 bp overlap were merged  
523 into a single sequence (allowing for 1 mismatch) at least 30 bp in length, using a modified form  
524 of the SeqPrep tool (<https://github.com/jstjohn/SeqPrep>) which retains the highest quality  
525 base in the overlap region. Autosomal sequences were aligned to the human reference  
526 genome hg19 (1000 genomes version, downloaded at  
527 [http://ftp.1000genomes.ebi.ac.uk/vol1/ftp/technical/reference/human\\_g1k\\_v37.fasta.gz](http://ftp.1000genomes.ebi.ac.uk/vol1/ftp/technical/reference/human_g1k_v37.fasta.gz) )  
528 using *bwa* v.0.6.1 with the *samse* command (Li and Durbin 2009). Following alignment, clusters  
529 of duplicate reads were identified based on start and end position, and orientation; for each  
530 cluster of reads, the highest quality representative was used.

531 For libraries with mitochondrial DNA enrichment, the same procedure was used, except  
532 that the mitochondrial sequences were treated separately and aligned to the RSRs reference  
533 genome (Behar et al. 2012) rather than hg19. We measured damage rates on both ends of  
534 mapped reads to assess their authenticity, as summarized in Table S3.1 and in Fig. S3.1.

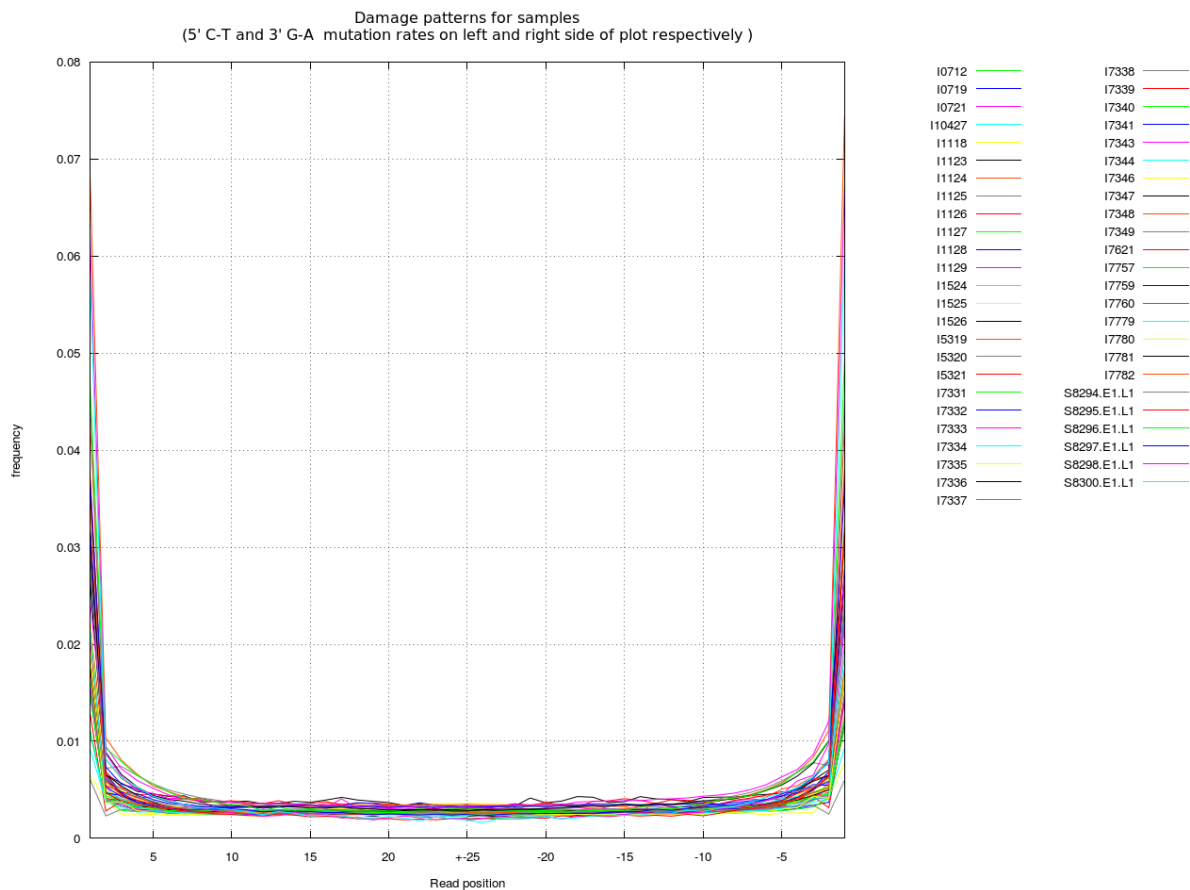

535

536 **Fig. S3.1:** Damage rates (5' C->T, 3' A->G) obtained from mapped reads of all samples.

537

#### 538 *References (for this section)*

539 Behar, D. M. *et al.* A 'Copernican' reassessment of the human mitochondrial DNA tree from its root. *Am. J. Hum.*  
540 *Genet.* **90**, 675–684 (2012).

541 Li, H. & Durbin, R. Fast and accurate short read alignment with Burrows-Wheeler Transform. *Bioinformatics* **25**,  
542 1754–1760 (2009).

## 543 **Supplementary Information section 4**

### 544 **Principal component analysis and outlier removal**

545

546 The first round of outlier removal (prior to *ChromoPainter v.1* and *v.2*, *fineSTRUCTURE*, HSS,  
547 *GLOBETROTTER* analyses and the *ADMIXTURE* analyses presented in Extended Data Fig. 8) is  
548 illustrated in Tables S4.1 and S4.2. These spreadsheets display unsupervised *ADMIXTURE*  
549 results (K=14 and K=11 in the case of the HumanOrigins and Illumina datasets, respectively),  
550 average weighted Euclidean distances, PC1 vs. PC2 plots, and outcomes of the outlier  
551 removal procedure for each American and Siberian population composed of 3 or more  
552 individuals and having at least one outlier. We note that outliers were removed from all  
553 populations, and the above-mentioned populations were selected to illustrate our approach  
554 and at the same time to keep the size of the spreadsheets reasonably small. The procedure  
555 itself is explained in the Methods section.

556 Individuals having outlying average weighted Euclidean distances (vs. all other  
557 individuals in a population) were identified using the established definition of an outlier:  $>$   
558  $[3^{\text{rd}} \text{ quartile} + 1.5 \times (3^{\text{rd}} \text{ quartile} - 1^{\text{st}} \text{ quartile})]$ . Manual removal of outliers based on  
559 *ADMIXTURE* profiles, i.e. on outstanding proportions of European and other non-typical  
560 ancestry components, was prioritized, and some individuals identified as outliers based on  
561 average weighted Euclidean distances were kept if they had a typical *ADMIXTURE* profile  
562 (see examples for the Ket, Nganasan, Tubalar, and Yup'ik Chaplin/Sireniki populations in the  
563 HumanOrigins dataset, Table S4.1). If a majority of individuals in a population had colonial  
564 admixture, we removed only those having the most extreme admixture proportions, in  
565 order to keep the final population size reasonably large (see examples for the Splatsin,  
566 Stswecem'c, Tlingit and other groups in the Illumina dataset, Table S4.2). Removal of  
567 outliers based on average weighted Euclidean distances was prioritized if all individuals had  
568 a uniform *ADMIXTURE* profile (see examples for the Karitiana, Mansi, Surui, Xavante, and  
569 Zapotec populations in the HumanOrigins dataset, Table S4.1).

570 To illustrate the effects of the second round of outlier removal (prior to *qpWave*,  
571 *qpAdm*, *qpGraph*, *ALDER*, and  $f_4$ -statistic analyses), we performed principal component  
572 analysis (PCA) on the datasets without transitions used for the above-listed analyses (Fig.  
573 S4.1). Native American individuals (i.e. those belonging to the First Peoples, Na-Dene, and  
574 Eskimo-Aleut meta-populations) having  $>1\%$  European, African, or Southeast Asian ancestry  
575 according to *ADMIXTURE* were removed, as well as Chukotkan and Kamchatkan individuals  
576 with  $>1\%$  European ancestry. PCA plots for original datasets prior to any outlier removal are  
577 shown in Fig. 1a and Extended Data Fig. 2.

578 We dated 12 burials at the Ust'-Belaya site at the confluence of the Belaya and  
579 Angara Rivers: seven burials were dated to ca. 4,500 – 4,800 calBP, four burials were dated  
580 to an earlier period between ca. 5,700 and 7,000 calBP, and a medieval burial was dated to  
581 ca. 600 calBP (Supplementary Table 2). We generated genome-wide data for all 12  
582 individuals (Supplementary Table 1). Among these samples, 3 were removed due to a high  
583 percentage of missing data (Supplementary Table 1), and all but one remaining samples  
584 form a tight cluster positioned between the C-K/P-E and Siberian clusters in the space of  
585 two principal components (PC1 and PC2, Fig. 1a, Extended Data Fig. 2). Remarkably, an  
586 individual I7760 (Mos85) buried at Ust'-Belaya and dated to 5740 – 5900 calBP  
587 (Supplementary Table 2) is a genetic outlier demonstrating the typical West Siberian genetic

588 profile (Fig. 1a, Extended Data Fig. 2).

589

590 **Fig. S4.1.** PCA based on the HumanOrigins (a) and Illumina (b) datasets without transitions used for the  
591 *qpWave/qpAdm* and *ALDER* analyses. The datasets have undergone a stringent outlier removal procedure, as  
592 described in the Methods section. The analyses are based on 649 (a) or 472 (b) individuals and 111,147 (a) or  
593 96,155 (b) loci. Plots of two principal components (PC1 vs. PC2) are shown (linkage disequilibrium pruning was  
594 not applied). The following meta-populations most relevant for our study are plotted: present-day Eskimo-  
595 Aleut and Chukotko-Kamchatkan speakers, ancient Chukotkan Neo-Eskimos (Ekven and Uelen sites), ancient  
596 Aleuts, Paleo-Eskimos (the Saqqaq, Middle Dorset and Late Dorset individuals), ancient Northern Athabaskans,  
597 present-day Na-Dene speakers, Northern and Southern First Peoples, West and East Siberians, the Ust'-Belaya  
598 Angara ancient Siberian population, Southeast Asians, and Europeans. Calibrated radiocarbon dates in years  
599 before present are shown for ancient samples. For individuals, 95% confidence intervals are shown, and for  
600 populations, minimal and maximal median dates among individuals are shown.

601 a

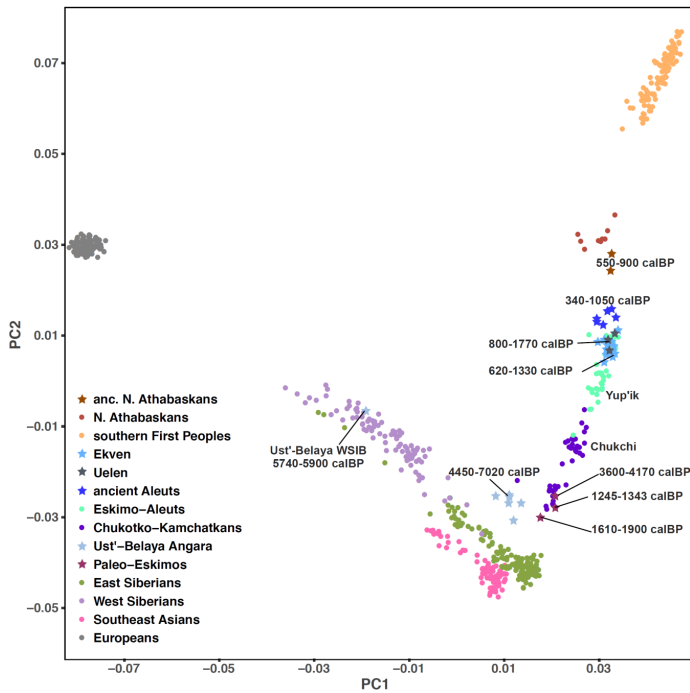

602

b

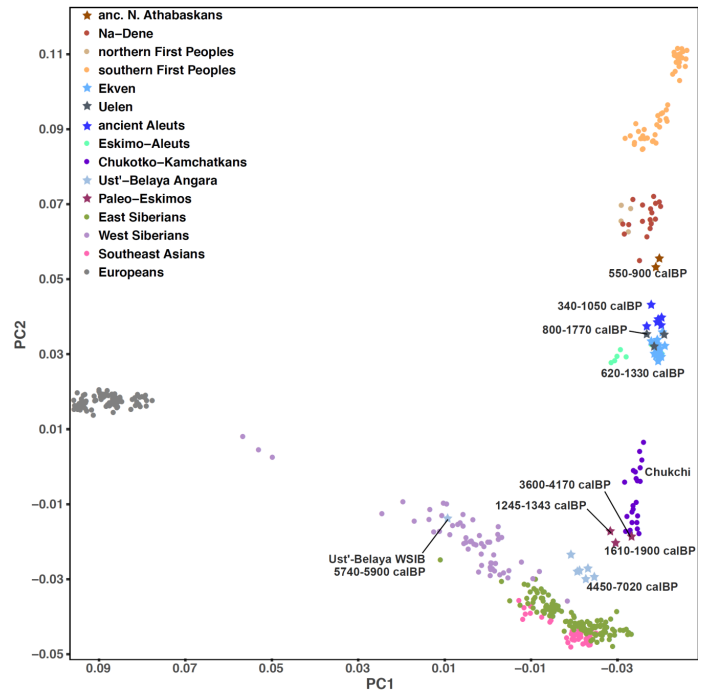

## 603 **Supplementary Information section 5**

### 604 **Exhaustive analysis of ancestry streams in small population sets**

605

606 We performed testing of two- and three-way admixture models in groups of three and four  
607 populations (triplets and quadruplets) using *qpAdm* (Haak et al. 2015) and *qpWave* (Reich et  
608 al. 2012): closely related tools that in conjunction allow testing whether two- or multi-  
609 component admixture models fit the data, and allow inferring admixture proportions  
610 (*qpAdm*) without assuming a particular tree topology. This class of methods relies on allele  
611 frequencies in populations, and thus requires careful definition of population groups and  
612 outlier pruning. The *qpWave* tool is used to infer how many independent lines of ancestry  
613 relate a set of test populations to a set of outgroups. *qpWave* relies on a matrix of statistics  
614  $f_4(\text{test}_1, \text{test}_i; \text{outgroup}_1, \text{outgroup}_x)$ . Usually, few test populations from a certain region and  
615 a diverse worldwide set of outgroups (having no recent gene flow from the region of  
616 interest) are co-analyzed (Haak et al. 2015, Lazaridis et al. 2016, Skoglund et al. 2015), and a  
617 statistical test is performed to determine whether allele frequencies in the test populations  
618 can be explained by one, two, or more streams of ancestry derived from the outgroups. If a  
619 group of three populations, a triplet, is derived from two ancestry streams according to a  
620 *qpWave* test, and any pair of the constituent populations shows the same result, it follows  
621 that one of the populations can be modelled as having ancestry from the other two using  
622 *qpAdm*. If a set of outgroups includes populations closely related to at least one of the  
623 admixture partners, the power to distinguish alternative admixture models is increased.

624 The following sets of outgroup populations were used for analyses on the  
625 HumanOrigins dataset: 1) "OG19", 19 outgroups from five broad geographical regions:  
626 Mbuti, Taa, Yoruba (Africans), Nganasan, Tuvinian, Ulchi, Yakut (East Siberians), Altaian, Ket,  
627 Selkup, Tubalar (West Siberians), Czech, English, French, North Italian (Europeans), Dai,  
628 Miao, She, Thai (Southeast Asians); 2) "OG19\_UB1526", OG19 and an ancient Siberian  
629 individual I1526 (the highest-coverage individual at the Ust'-Belaya Angara site) that is  
630 distinct from the other Siberians according to our PCA analyses (section 4) and thus might  
631 increase the diversity of Siberian outgroups and the resolution of the method; 3) "OGA", 8  
632 diverse Siberian populations (Nganasan, Tuvinian, Ulchi, Yakut, Even, Ket, Selkup, Tubalar)  
633 and a Southeast Asian population (Dai); 4) "OGA\_Koryak", OGA and Koryak, a C-K group that  
634 supposedly provides higher resolution since it is closely related to the putative PPE  
635 admixture partners (section 10); 5) "OGA\_UB1526", OGA and the Ust'-Belaya Angara  
636 individual I1526.

637 Similar sets of outgroup populations were used for analyses based on the Illumina  
638 dataset: 1) "OG20": Bantu (Kenya), Mandenka, Mbuti, Yoruba (Africans), Buryat, Evenk,  
639 Nganasan, Tuvinian, Yakut (East Siberians), Altaian, Khakas, Selkup (West Siberians), Basque,  
640 Sardinian, Slovak, Spanish (Europeans), Dai, Lahu, Miao, She (Southeast Asians); 2)  
641 "OG20\_UB1526", OG20 and the highest-coverage Ust'-Belaya Angara individual I1526; 3)  
642 "OGA", 9 Siberian populations (Buryat, Dolgan, Evenk, Nganasan, Tuvinian, Yakut, Altaian,  
643 Khakas, Selkup) and Dai; 4) "OGA\_Koryak", OGA and Koryak; 5) "OGA\_UB1526", OGA and  
644 the Ust'-Belaya Angara individual I1526. Population triplets and quadruplets were tested  
645 using both the HumanOrigins and Illumina SNP array datasets, with or without transition  
646 polymorphisms, and using these five alternative outgroup sets. Paleo-Eskimos (P-E) were  
647 represented by the Saqqaq (ca. 3,900 calBP), or Middle Dorset (ca. 1,750 calBP), or Late  
648 Dorset individuals (ca. 750 calBP), widely separated in space and time, and two types of SNP

649 calls were tested for the Saqqaq individual: published diploid calls (Raghavan et al. 2014)  
650 with 50-58% missing rates in various dataset versions, and pseudo-haploid calls with much  
651 lower missing rates of 4-11% (in various dataset versions) generated by us and also used for  
652 *qpGraph* model fitting (section 10). Missing rates for the Middle and Late Dorset samples  
653 were as follows: 89-90% and 70-75% in various dataset versions, respectively. Chukotko-  
654 Kamchatkan speakers (C-K) served as an alternative PPE source, and were represented by  
655 Chukchi, Koryak, and Itelmen (the HumanOrigins dataset), and by Chukchi and Koryak in the  
656 case of the Illumina dataset.

657 For the *qpWave/qpAdm* analyses, any American individuals with >1% European,  
658 African, or Southeast Asian ancestry according to the *ADMIXTURE* analysis (Extended Data  
659 Fig. 8) were removed, as well as Chukotkan and Kamchatkan individuals with >1% European  
660 ancestry. Some additional Chipewyan and West Greenlandic Inuit individuals were removed  
661 since European ancestry undetectable with *ADMIXTURE* was revealed in them using *D*-  
662 statistics (Yoruba or Dai, Icelander; Chipewyan individual, Karitiana) and (Yoruba or Dai,  
663 Slovak; West Greenlandic Inuit individual, Karitiana). Any individual with any of the two  
664 absolute Z-scores >3 was removed.

665 First, we tested if essentially all present-day and ancient American and Chukotkan  
666 populations can be modelled as a mixture of two sources: selected First Peoples (FAM) and  
667 mostly unadmixed representatives of the PPE clade: P-E or C-K. To this end, we exhaustively  
668 tested the following population triplets using *qpAdm*, for four dataset versions and five  
669 outgroup sets: 1/ C-K, FAM, PPE; 2/ E-A, FAM, PPE; 3/ Na-Dene (N-D), FAM, PPE; 4/ P-E,  
670 FAM, PPE; 5/ SAM, FAM, PPE; 6/ NAM, FAM, PPE. The FAM group was represented by three  
671 alternative sources in the case of the HumanOrigins dataset: relatively large SAM  
672 populations with no signs of colonial admixture (Guarani, 17 ind.; Karitiana, 12 ind.; Mixe, 10  
673 ind.). In the case of the Illumina dataset, a NAM source with no signs of P-E admixture  
674 (Extended Data Figs. 3 and 4) was also added, and the full list of alternative FAM sources  
675 was as follows: Pima (SAM, 13 ind.), Karitiana (SAM, 13 ind.), Mixtec (SAM, 7 ind.), Nisga'a  
676 (NAM, 3 ind.). A C-K outgroup (Koryak in the "OGA\_Koryak" outgroup sets) was not tested  
677 for population triplets/quadruplets including a C-K group since such models are expected to  
678 be non-fitting by default.

679 Here we summarize the results for the HumanOrigins transversion-only dataset  
680 (Table S5.1). First, C-K (represented by Koryak or Itelmen) does not make a good PPE source  
681 for E-A populations since most 2-way admixture models "E-A = FAM + C-K" are non-fitting  
682 even at the 0.01 *p*-value threshold (5 or 6 of 18 models fit). This result holds for all outgroup  
683 sets tested. However, models including Chukchi as a PPE source fit much better, probably  
684 because of an elevated E-A admixture in Chukchi (see Fig. 1a, Extended Data Figs. 2 and 8,  
685 sections 5, 8). Notably, the models generally work for ancient Aleuts and the Old Bering Sea  
686 group from Uelen, and the former group has no C-K admixture according to our *qpGraph*,  
687 *Rarecoal*, and RASS analyses (sections 8, 9, 10). This result can be interpreted in the  
688 following way: two-way admixture models "FAM + C-K" do not fit for ancient Neo-Eskimos  
689 (Ekven) and for present-day Iñupiat and Yup'ik since two distinct PPE sources contributed to  
690 these groups, i.e. the original PPE source and C-K during the later bidirectional gene flow  
691 event. Moreover, according to all fitting *qpGraph* models (Fig. S10.3), C-K groups are rather  
692 distant from the PPE source in E-A (here named "PPE<sub>E-A</sub>"), which is much closer to the  
693 Saqqaq Paleo-Eskimo.

694 In line with these phylogenetic models, P-E make a perfect source for ancient and  
695 present-day E-A: 332 of 360 models "E-A = FAM + P-E" are fitting at the 0.05 *p*-value

696 threshold. Here we counted all five alternative outgroup sets and four alternative P-E  
697 sources (Saqqaq diploid calls, Saqqaq pseudo-haploid calls, the Middle Dorset individual and  
698 the Late Dorset individual). Most non-fitting models are of the following type: “Yup'ik = FAM  
699 + P-E”, with the “OGA\_Koryak” outgroup set. Due to a high level of C-K admixture in Yup'ik  
700 (see Extended Data Fig. 8, sections 5, 8), an assumption of the method, i.e. absence of gene  
701 flow from ingroups to outgroups, is violated, and the models become non-fitting.

702 Second, both P-E and C-K make good proxies for PPE ancestry in ancient and  
703 present-day N-D (Table S5.1): 72 of 108 models “N-D = FAM + C-K” (or 67% of models) are  
704 fitting at the 0.05  $p$ -value threshold; 126 of 144 models “N-D = FAM + P-E” (or 88% of  
705 models) are fitting at the 0.05  $p$ -value threshold (here we counted four alternative outgroup  
706 sets, three alternative C-K sources, and four alternative P-E sources). These results agree  
707 with the best-fitting admixture graph (Fig. S10.5) since  $PPE_{C-K}$  and  $PPE_{P-E}$  split points are  
708 approximately equidistant from the  $PPE_{N-D}$  split point, and thus C-K and P-E may serve  
709 equally well as proxies for  $PPE_{N-D}$ .

710 Third, most admixture models for 19 SAM populations are consistent with 0% PPE  
711 ancestry (Extended Data Fig. 3a-e, Table S5.1. We observe that estimates of PPE ancestry  
712 proportions in other populations are highly dependent on the PPE proxies used (Table S5.1):  
713 the lowest for the Late Dorset individual, and the highest for Saqqaq pseudo-haploid calls.  
714 We refrain from judging which estimates are closer to reality, although ranking of  
715 populations according to the PPE ancestry proportion remains relatively stable across  
716 various proxies and outgroup sets (Fig. 1b, Extended Data Figs. 3 and 4). Here we ranked  
717 populations according to increasing percentage of PPE ancestry (Fig. 1b): 1/ SAM, 2/  
718 Chipewyans and Dakelh, 3/ ancient Athabaskans, 4/ ancient Aleuts, 5/ Iñupiat, Ekven, and  
719 Uelen having almost equal percentages, 6/ Yup'ik Naukan, 7/ Yup'ik Chaplin/Sireniki, 8/ C-K  
720 and P-E. This ranking is in line with our migration model (see the Discussion and Fig. 3).  
721 Gene flow from neighboring NAM groups most likely continued after the initial NAM/P-E  
722 admixture event in Na-Dene ancestors, so the percentage of PPE ancestry went down  
723 gradually over time. Ancient Aleuts remained in Alaska and never experienced the later  
724 pulse of C-K admixture (section 10), which is shared by Ekven, Uelen (ancient Chukotkan  
725 Neo-Eskimos of the Old Bering Sea culture), and Iñupiat (present-day Alaskans whose  
726 ancestors migrated from Chukotka according to archaeological evidence, Jensen 2016,  
727 Mason 2016). Unlike Iñupiat and other Inuit, Yup'ik have remained in Chukotka since their  
728 initial backward migration from Alaska (Fig. 3), and had much more time for interacting with  
729 local C-K; thus the elevated PPE ancestry proportion in Yup'ik is not unexpected. The C-K/E-  
730 A admixture was bidirectional (section 10), and E-A ancestry proportion is also non-uniform  
731 among C-K.

732 The results remain virtually the same for the full HumanOrigins dataset (Table S5.2).  
733 Even fewer models “E-A = FAM + Koryak/Itelmen” fit the data: 8 models of 144 at the  $p$ -  
734 value threshold of 0.05, namely the models “ancient Aleuts = FAM + Koryak/Itelmen” with  
735 the OGA and OG19 outgroup sets. In contrast, most models “E-A = FAM + P-E” remain  
736 fitting: 284 of 360 models at the 0.05  $p$ -value threshold. Here we counted all five alternative  
737 outgroup sets and four alternative P-E sources. Most non-fitting models are those with the  
738 “OGA\_Koryak” outgroup, and that result reflects C-K admixture in the ancestors of  
739 Yup'ik/Inuit. The results also remain unchanged for Na-Dene speakers: both P-E and C-K  
740 make good proxies for PPE ancestry in ancient and present-day N-D (Table S5.2): 71 of 108  
741 models “N-D = FAM + C-K” (or 66% of models) are fitting at the 0.05  $p$ -value threshold; 107  
742 of 144 models “N-D = FAM + P-E” (or 74% of models) are fitting at the 0.05  $p$ -value



743 threshold (here we counted four alternative outgroup sets, three alternative C-K sources,  
744 and four alternative P-E sources). The ranking of populations by PPE ancestry proportions  
745 also remains unchanged (Extended Data Fig. 4a-e, Table S5.2).

746 Next, we repeated the same analyses for the Illumina dataset. An advantage of this  
747 dataset is that it includes a wider diversity of Na-Dene speakers (Tlingit and Southern  
748 Athabaskans, in addition to Northern Athabaskans) and FAM populations (NAM in addition  
749 to SAM). The results of admixture model testing with *qpAdm* are generally similar for the  
750 Illumina and HumanOrigins datasets, with the following notable differences. First, for both  
751 the transversions-only (Table S5.3) and full datasets (Table S5.4), C-K and P-E represent  
752 equally fitting ancestry sources for E-A: 1/ models “E-A = FAM + C-K”, 138 (72%, Table S5.3)  
753 or 126 (66%, Table S5.4) of 192 models fit the data at the *p*-value threshold of 0.05; 2/  
754 models “E-A = FAM + P-E”, 330 (86%, Table S5.3) or 244 (64%, Table S5.4) of 384 models fit  
755 the data at the *p*-value threshold of 0.05. Here we counted four alternative outgroup sets  
756 and four alternative P-E sources (Saqqaq diploid calls, Saqqaq pseudo-haploid calls, Middle  
757 Dorset, and Late Dorset). As expected, the models “E-A = FAM + P-E” with the  
758 “OGA\_Koryak” outgroup set are non-fitting for all E-A except for ancient Aleuts (Table S5.3).  
759 This result reflects C-K admixture in the ancestors of Yup’ik/Inuit.

760 Another important finding is that PPE ancestry, with a proportion comparable to that  
761 found in Na-Dene speakers, was detected in one NAM population, Splatsin, while in Nisga’a,  
762 Haida, and in SAM populations it was consistent with 0% (Extended Data Figs. 3f-j and 4f-j,  
763 Tables S5.3, S5.4). Here we ranked populations according to increasing percentage of PPE  
764 ancestry (Extended Data Figs 3, 4): 1/ SAM, Nisga’a, and Haida, 2/ Southern Athabaskans, 3/  
765 Tlingit, 4/ three Northern Athabaskan groups and Splatsin (NAM), 5/ West Greenlandic Inuit,  
766 6/ ancient Athabaskans, 7/ Alaskan and East Greenlandic Inuit, ancient Aleuts, 8/ Ekven, and  
767 Uelen, 9/ C-K and P-E.

768 We also analyzed other types of population triplets and quadruplets using *qpWave*.  
769 To keep the number of tests reasonably low, here we excluded the lowest-coverage Paleo-  
770 Eskimo individual, i.e. Middle Dorset. In total, we ran 54,948 *qpWave* tests. The quadruplets  
771 tested had the following composition: SAM or NAM + N-D + E-A + P-E or C-K. The triplets  
772 tested had the following composition: SAM or NAM or N-D + E-A + P-E or C-K. Below we  
773 summarize results for the HumanOrigins dataset: the full and transversion-only versions,  
774 with the 0.01 and 0.05 *p*-value thresholds (Tables S5.5 – S5.8). Quadruplets “SAM + N-D + E-  
775 A + P-E” and triplets “SAM or N-D + E-A + P-E” were generally consistent with two migration  
776 waves (Table S5.5), except for models “SAM + N-D + Yup’ik + P-E” and “SAM or N-D + Yup’ik  
777 + P-E” with the “OGA\_Koryak” outgroup set. As discussed above, this result reflects the third  
778 genetic stream, i.e. the C-K admixture, easily detectable in Yup’ik having a high proportion  
779 of C-K ancestry (Extended Data Fig. 8, section 8). Overall, the results are consistent with P-E  
780 contributing genetically to both N-D and E-A, and the picture remains the same for the full  
781 dataset at both *p*-value thresholds, although it becomes noisier (Tables S5.7, S5.8). When P-  
782 E groups in the triplets and quadruplets were replaced by C-K groups, three or rarely even  
783 four, but not two migration streams fitted the data in most cases (3,290 vs. 1,270 triplets  
784 and quadruplets including Ekven, Inupiat, and Yup’ik), except for population sets including  
785 ancient Aleuts (Tables S5.5 – S5.8) and Uelen Neo-Eskimos (Tables S5.5 – S5.7). This pattern  
786 was observed for all outgroup sets, except for “OGA\_Koryak”, which is expected to increase  
787 the  $f_4$  matrix rank for any C-K-containing population set: data for 211 vs. 929 triplets and  
788 quadruplets fitted 2-stream vs. 3- or 4-stream models, respectively (Table S5.5). Taken  
789 together, these results are again consistent with two PPE gene flow events in the E-A

790 history: the first event in Alaska, and another gene flow from C-K to Yup'ik/Inuit ancestors in  
791 Chukotka. Ancient Aleuts had remained in Alaska and were not influenced by the latter  
792 event. The result observed for Uelen is more difficult to interpret, but it is possibly explained  
793 by the fact that Uelen is the smallest E-A group composed of just 3 pseudo-haploid  
794 individuals (cf. 6 ancient Aleuts, 16 Ekven Neo-Eskimos, 9 Yup'ik Naukan, 15 Yup'ik  
795 Chaplin/Sireniki, 20 Iñupiat, see Supplementary Table 4).

796 The Illumina dataset allowed us to explore population sets including NAM groups. In  
797 the case of the transversion-only dataset and the  $p$ -value threshold of 0.01 (Table S5.9),  
798 *qpWave* results were not influenced by the PPE proxy used: almost all triplets “SAM or NAM  
799 or N-D + E-A + P-E or C-K” and quadruplets “SAM or NAM + N-D + E-A + P-E or C-K” were  
800 consistent with two migration streams derived from the outgroups. The results were similar  
801 for NAM- and SAM-containing population sets (Table S5.9). The C-K admixture in E-A  
802 becomes apparent only if an outgroup very close to C-K is used, i.e. Koryak in the  
803 “OGA\_Koryak” outgroup set. In this case most quadruplets and triplets including P-E were  
804 consistent with three migration streams, except for those including ancient Aleuts, as  
805 expected (Table S5.9).

806 However, most triplets and quadruplets including C-K instead of P-E with the  
807 “OGA\_Koryak” outgroup set were consistent with two migration streams (344 vs. 36  
808 models, Table S5.9), except for those including ancient Aleuts. The latter sets were mostly  
809 consistent with three migration streams (18 models consistent with two streams vs. 58  
810 models consistent with three streams, Table S5.9). This somewhat unexpected result may  
811 be interpreted in the following way. If the method cannot easily resolve the  $PPE_{C-K}$  and  $PPE_{P-E}$   
812 ancestry sources, any population having ancestry from both sources (e.g., Yup'ik and Inuit)  
813 might fit the two-stream model due to an apparent lack of resolution, as well as any  
814 population having a low-level contribution from any of these sources (e.g., Na-Dene  
815 speakers). However, (ancient) Aleuts under our model have a substantial ancestry  
816 proportion (ca. 40-50%) derived from  $PPE_{P-E}$  only, thus a population group “SAM or NAM or  
817 N-D + ancient Aleuts + C-K” is not expected to fit the two-stream model. Overall, the  
818 *qpWave* results are noisier for the Illumina dataset (Tables S5.9 – S5.12), as compared to the  
819 HumanOrigins dataset (Tables S5.5 – S5.8).

820

#### 821 *References (for this section)*

- 822 Haak, W. *et al.* Massive migration from the steppe was a source for Indo-European languages in Europe.  
823 *Nature* **522**, 207–211 (2015).
- 824 Jensen, A. M. Archaeology of the Late Western Thule/Iñupiat in North Alaska (A.D. 1300–1750). *The Oxford*  
825 *Handbook of the Prehistoric Arctic*, ed. Friesen, T. M., Mason, O. K. New York: Oxford University Press.  
826 513–536 (2016).
- 827 Lazaridis, I. *et al.* Genomic insights into the origin of farming in the ancient Near East. *Nature* **536**, 419–424  
828 (2016).
- 829 Mason, O. K. Thule Origins in the Old Bering Sea Culture: The Interrelationship of Punuk and Birnirk Cultures.  
830 *The Oxford Handbook of the Prehistoric Arctic*, ed. Friesen, T. M., Mason, O. K. New York: Oxford  
831 University Press. 489–512 (2016).
- 832 Raghavan, M. *et al.* The genetic prehistory of the New World Arctic. *Science* **345**, 1255832 (2014).
- 833 Reich, D. *et al.* Reconstructing Native American population history. *Nature* **488**, 370–374 (2012).
- 834 Skoglund, P. *et al.* Genetic evidence for two founding populations of the Americas. *Nature* **525**, 104–108  
835 (2015).
- 836

## 837 **Supplementary Information section 6**

### 838 **Haplotype sharing statistics**

839

840 To investigate Paleo-Eskimo ancestry in Native Americans in a hypothesis-free way, we  
841 considered haplotypes shared between Native Americans and the ancient Saqqaq  
842 individual. Cumulative lengths of shared autosomal haplotypes were produced with  
843 *ChromoPainter v.1* for pairs of individuals, in the form of all vs. all “coancestry matrices”  
844 (Lawson et al. 2012). First, for each American individual we considered the length of  
845 haplotypes shared with Saqqaq in both the donor-to-recipient and recipient-to-donor  
846 directions (in cM), which we refer to as Saqqaq haplotype sharing statistic or HSS. In the  
847 same way we estimated haplotype sharing between each American individual and Africans,  
848 Europeans, Siberians, and Arctic (Chukotko-Kamchatkan- and Eskimo-Aleut-speaking)  
849 groups by averaging HSS across individuals of a given meta-population. To normalize for  
850 coverage differences and other biases, we divided the Saqqaq HSS by the African HSS, and  
851 termed the resulting statistic “relative HSS.” Alternatively, we used Siberian HSS as a  
852 normalizer. To visually assess correlation of haplotype sharing with Saqqaq and with closely  
853 related Chukotko-Kamchatkan- and Eskimo-Aleut-speaking populations, here collectively  
854 termed Arctic, we combined relative Saqqaq HSSs and relative Arctic HSS on two-  
855 dimensional plots. We analyzed both the HumanOrigins (Fig. S6.1) and the Illumina (Fig.  
856 S6.2) datasets with a more diverse collection of Na-Dene-speaking individuals.

857 Since the ancient Saqqaq individual has demonstrable genetic affinities to both  
858 Arctic and Siberian meta-populations (Rasmussen et al. 2010, Raghavan et al. 2014, 2015,  
859 Flegontov et al. 2016, see also ADMIXTURE profiles in Extended Data Fig. 8), we also  
860 scrutinized relative Arctic and Siberian HSSs (Figs. S6.3, S6.4). We observe that each meta-  
861 population is scattered along a line on the Arctic vs. Siberian two-dimensional HSS plot,  
862 which reflects similar ratios of the Siberian and Arctic haplotype sharing among its  
863 members. The position of a population along the line depends on the presence of other  
864 ancestry components. For example, Aleuts, who have a high level of European admixture  
865 (Raghavan et al. 2014, 2015) (see also Extended Data Fig. 8), lie much closer to zero on both  
866 axes as compared to other Eskimo-Aleut-speaking groups (Fig. S6.3a,c). While First Peoples  
867 form a tight cluster, the Athabaskan-speaking Dakelh and some Chipewyans are shifted  
868 considerably towards the Saqqaq individual (Fig. S6.3a,c). Since haplotype sharing statistics  
869 behave linearly under recent admixture, we used linear combinations to calculate expected  
870 HSSs for mixtures of First Peoples with Saqqaq or with Eskimo-Aleut-speaking populations.  
871 We find that HSSs for two Dakelh (Fig. S6.3b,d) and for several Northern Athabaskan,  
872 Southern Athabaskan, and Tlingit individuals (Fig. S6.4b,d) are inconsistent with a recent  
873 Inuit or Yup'ik admixture event, but consistent with Saqqaq admixture. However, these  
874 simple simulations do not rule out an ancient admixture event with a Neo-Eskimo group  
875 since subsequent drift in Siberians or Arctic groups could have skewed the HSSs.

876

877

878 **Fig. S6.1.** Two-dimensional plots of Arctic and Saqqaq haplotype sharing statistics normalized using the African  
 879 (a, b) or Siberian (c, d) meta-populations and based on the HumanOrigins SNP array dataset. a, c, Plots  
 880 showing statistics for individuals of all relevant populations and meta-populations (color-coded according to  
 881 the legend). b, d, Enlarged plots showing statistics for individuals of primarily First Peoples ancestry. The  
 882 highest Saqqaq haplotype sharing statistics among Southern First Peoples is marked by the horizontal line.  
 883 Northern Athabaskan-speaking individuals (outliers on the Arctic and/or Saqqaq axes) selected for the  
 884 GLOBETROTTER analysis are marked with circles in panel d.

885

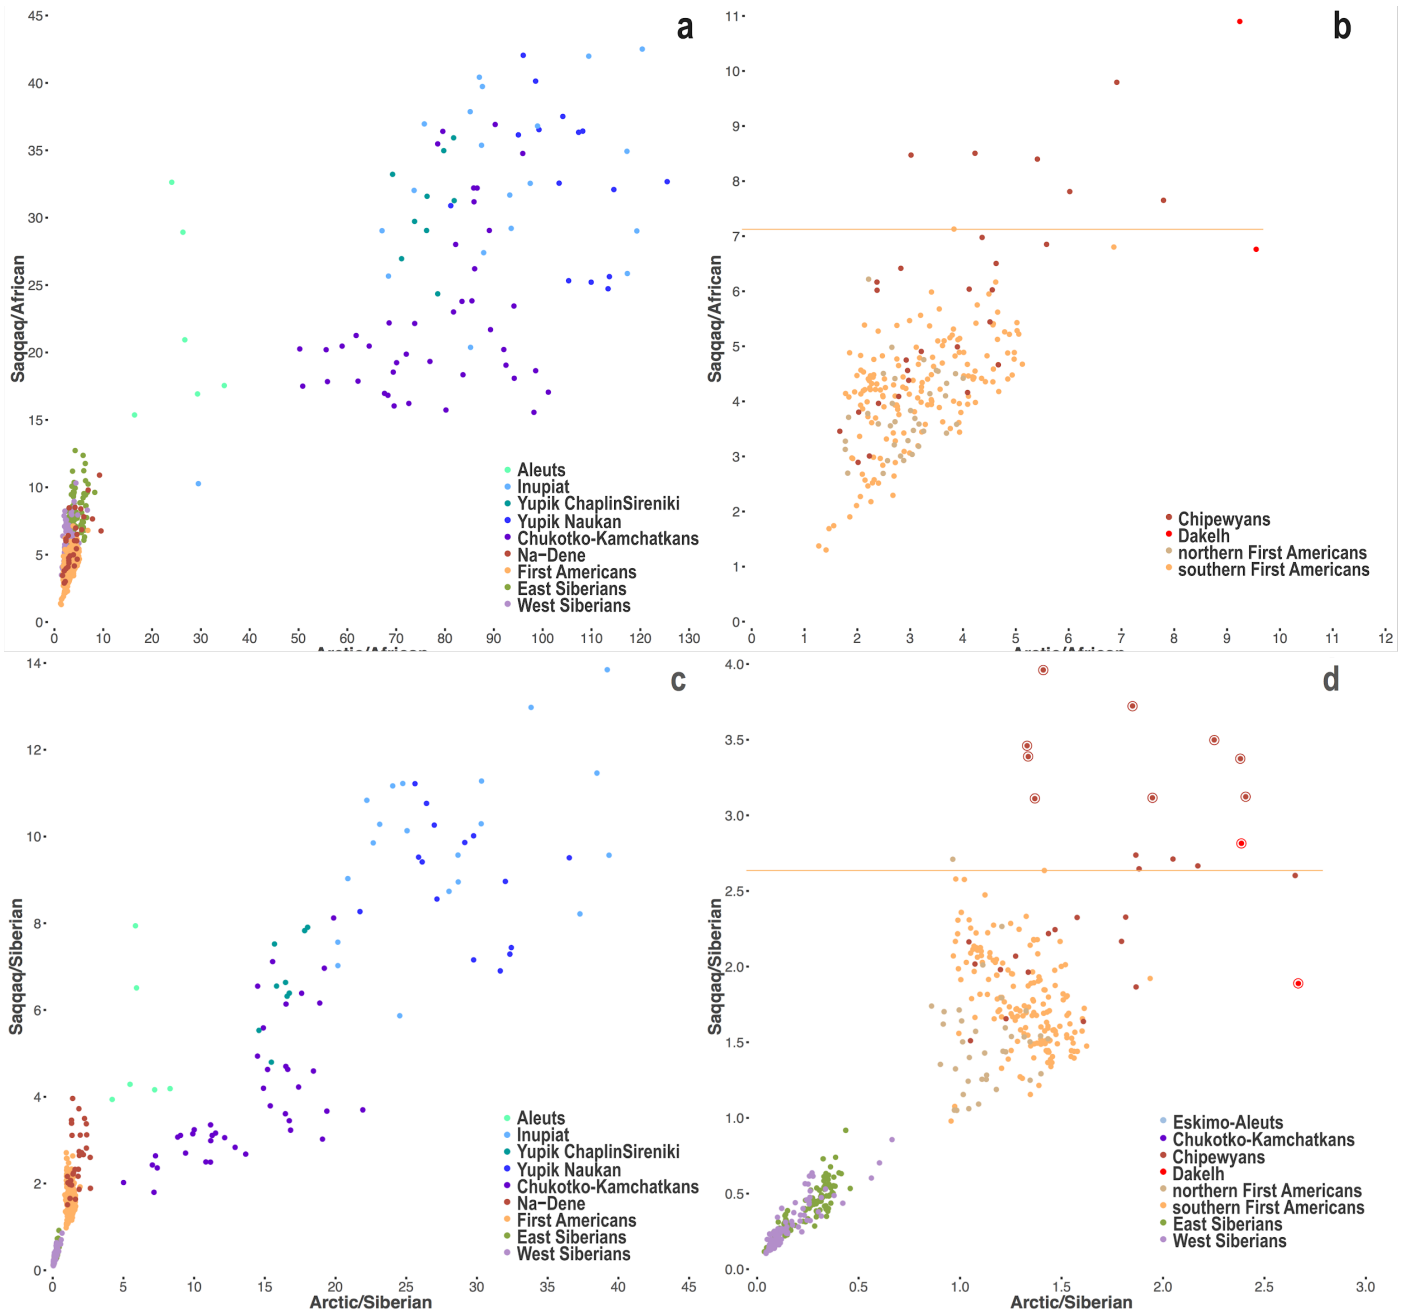

886 **Fig. S6.2.** The same results as in Fig. S6.1, but based on the Illumina SNP array dataset. Northern Athabaskan-  
 887 and Tlingit-speaking individuals (outliers on the Arctic and/or Saqqaq axes) selected for the *GLOBETROTTER*  
 888 analysis are marked with circles in panel **d**. Two Athabaskan-speaking Dakelh individuals with shotgun  
 889 sequencing data, also included into the HumanOrigins and whole genome datasets, are marked with callouts.

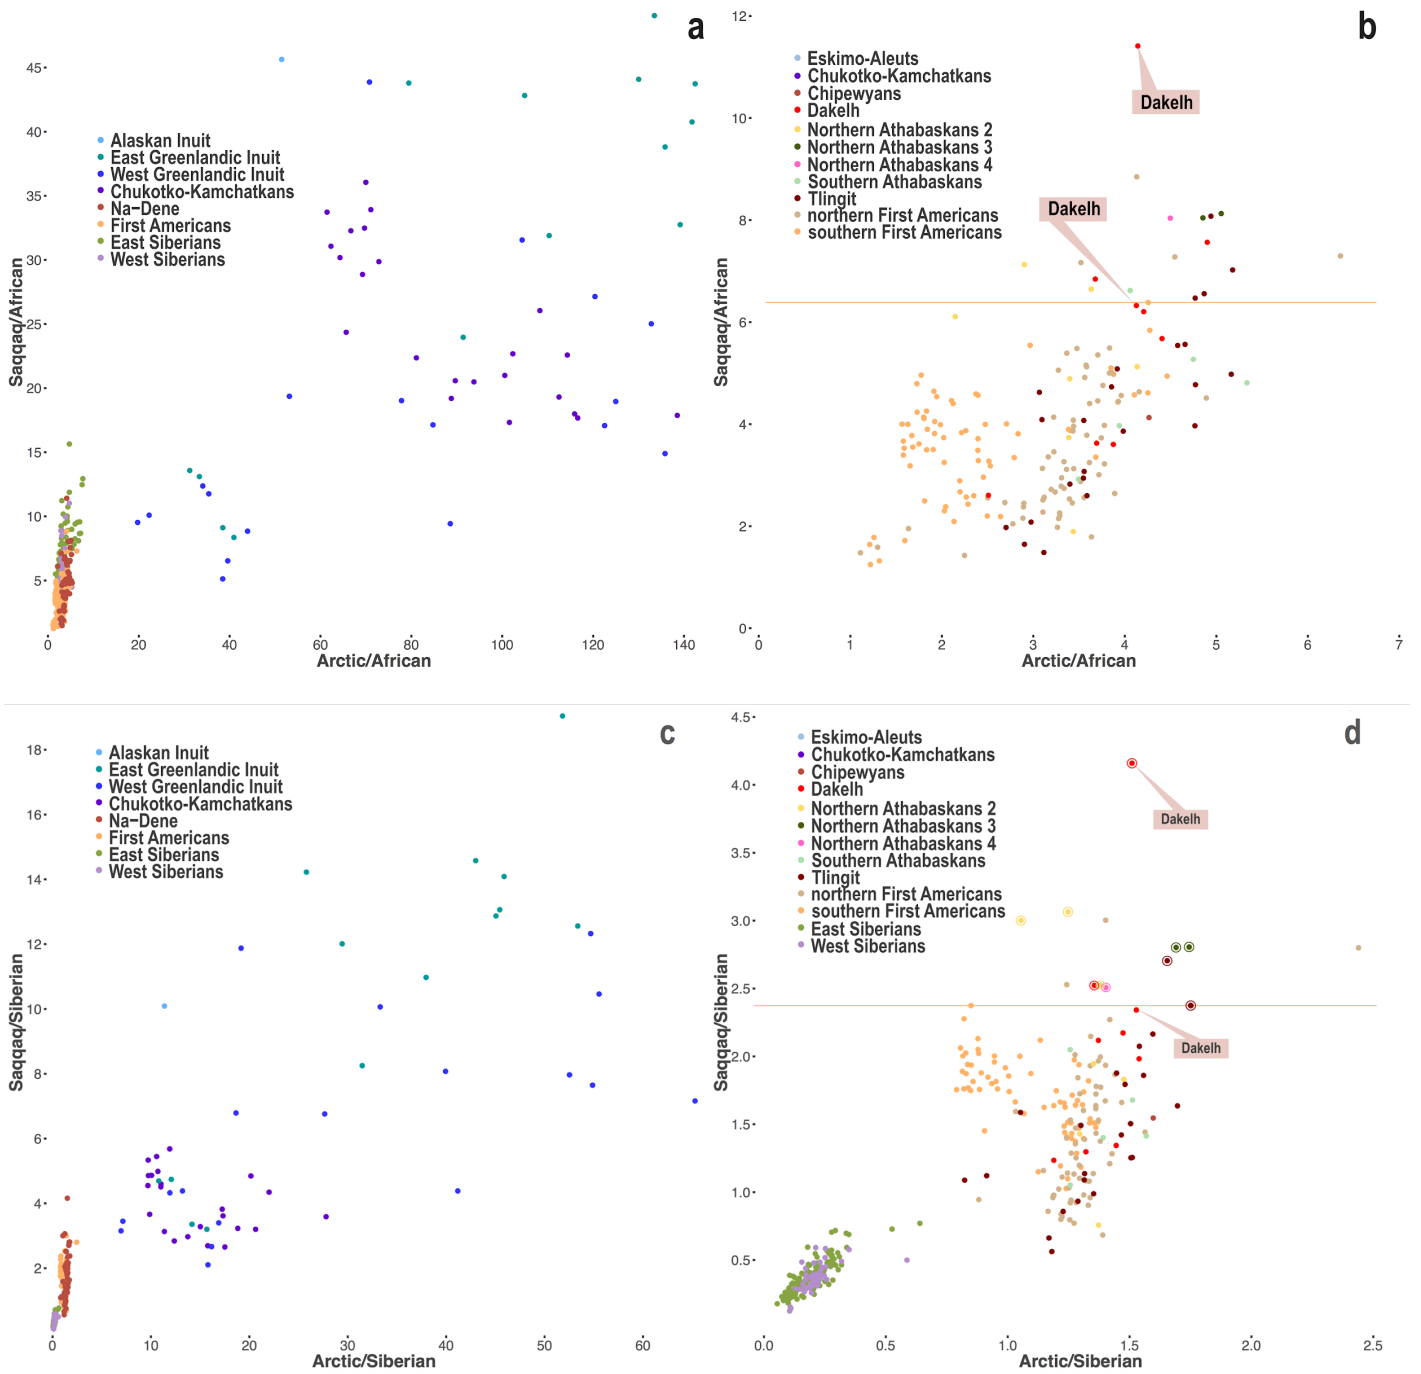

890  
 891

892 **Fig. S6.3.** Two-dimensional plots of Arctic and Siberian haplotype sharing statistics normalized using the  
 893 European (**a, b**) or African (**c, d**) meta-populations and based on the HumanOrigins SNP array dataset. **a, c,**  
 894 Plots showing statistics for individuals of all relevant populations and meta-populations (color-coded according  
 895 to the legend). **b, d,** Enlarged areas of the plots showing statistics for First Peoples individuals and simulated  
 896 mixtures of any present-day southern First Peoples population and the Saqqaq individual (from 5% to 70%,  
 897 with 5% increments), and similar mixtures with Eskimo-Aleut-speaking populations (>5% of Iñupiat or Yup'ik  
 898 ancestry). Average values of the statistics in populations were used to calculate the simulated statistics.

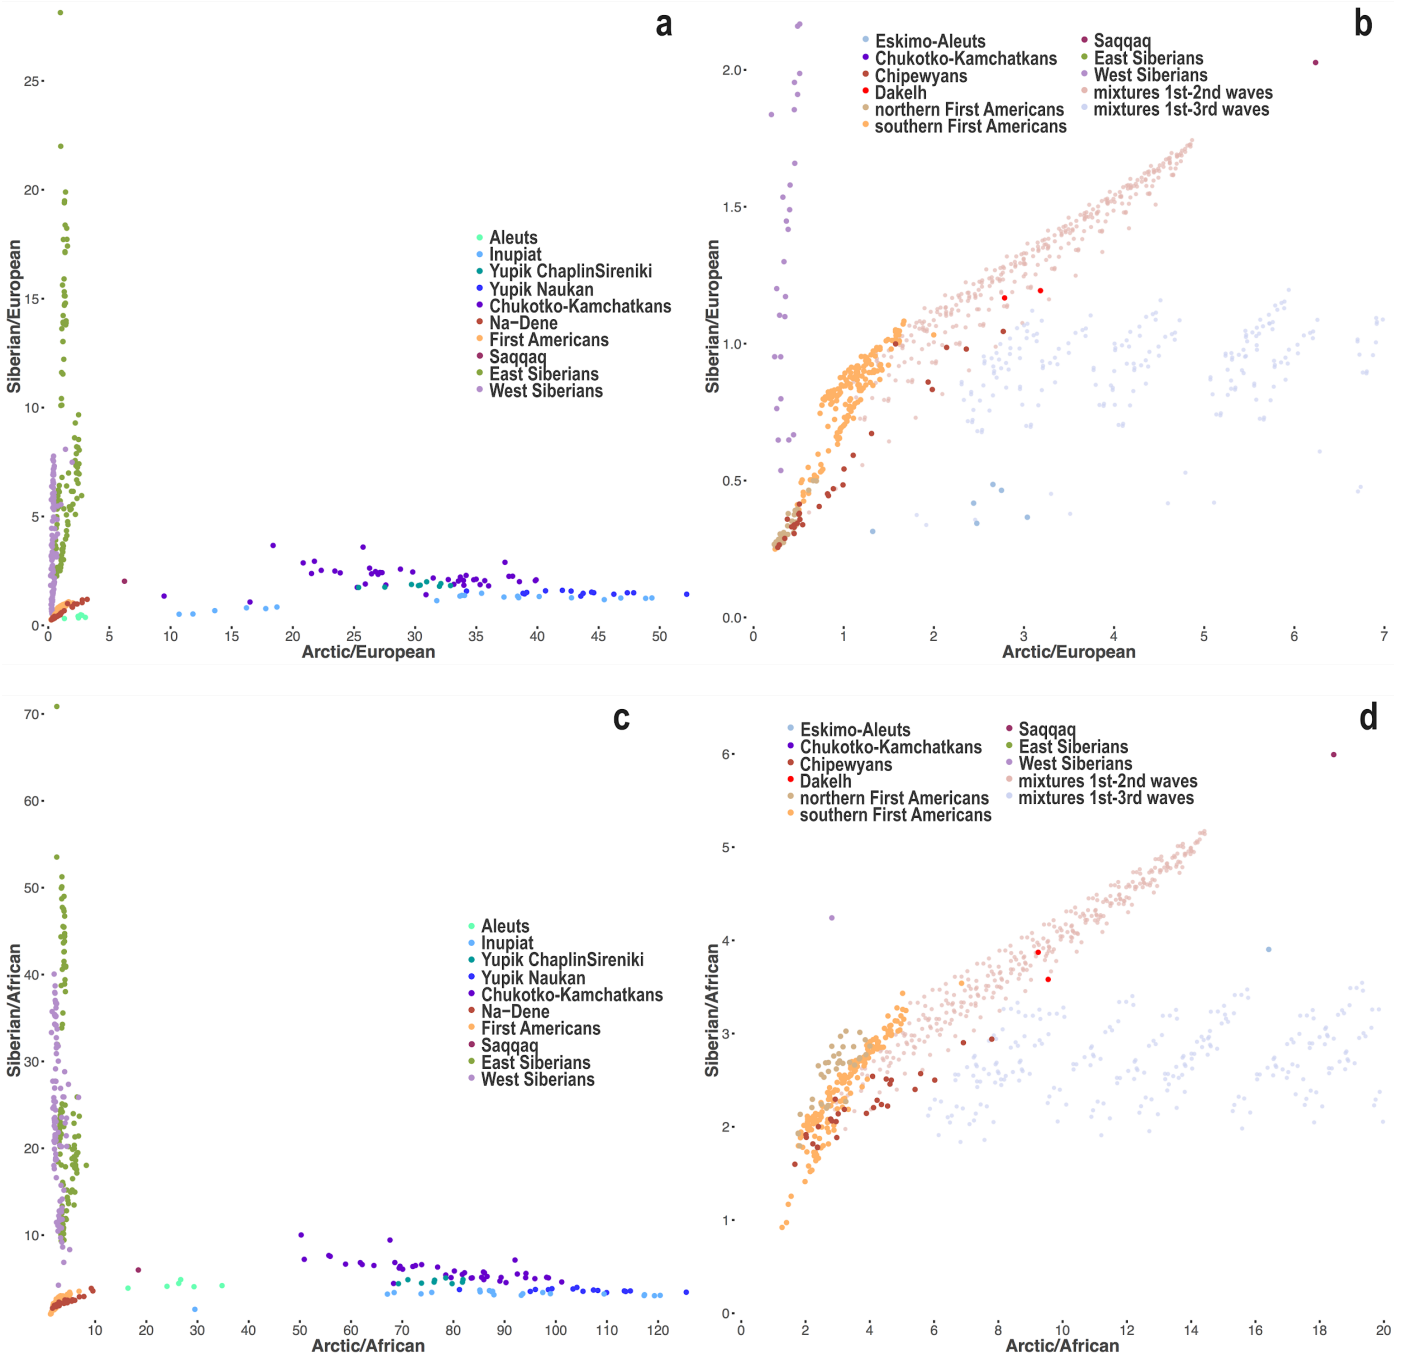

899  
 900

901 **Fig. S6.4.** The same results as in Fig. S6.3, but based on the Illumina SNP array dataset. For calculating  
 902 simulated mixtures, the following Eskimo-Aleut-speaking populations were used: Alaskan Inuit, East or West  
 903 Greenlandic Inuit. Various Na-Dene-speaking populations are color-coded, and two Athabaskan-speaking  
 904 Dakelh individuals with shotgun sequencing data, also included into the HumanOrigins and whole genome  
 905 datasets, are marked with callouts.

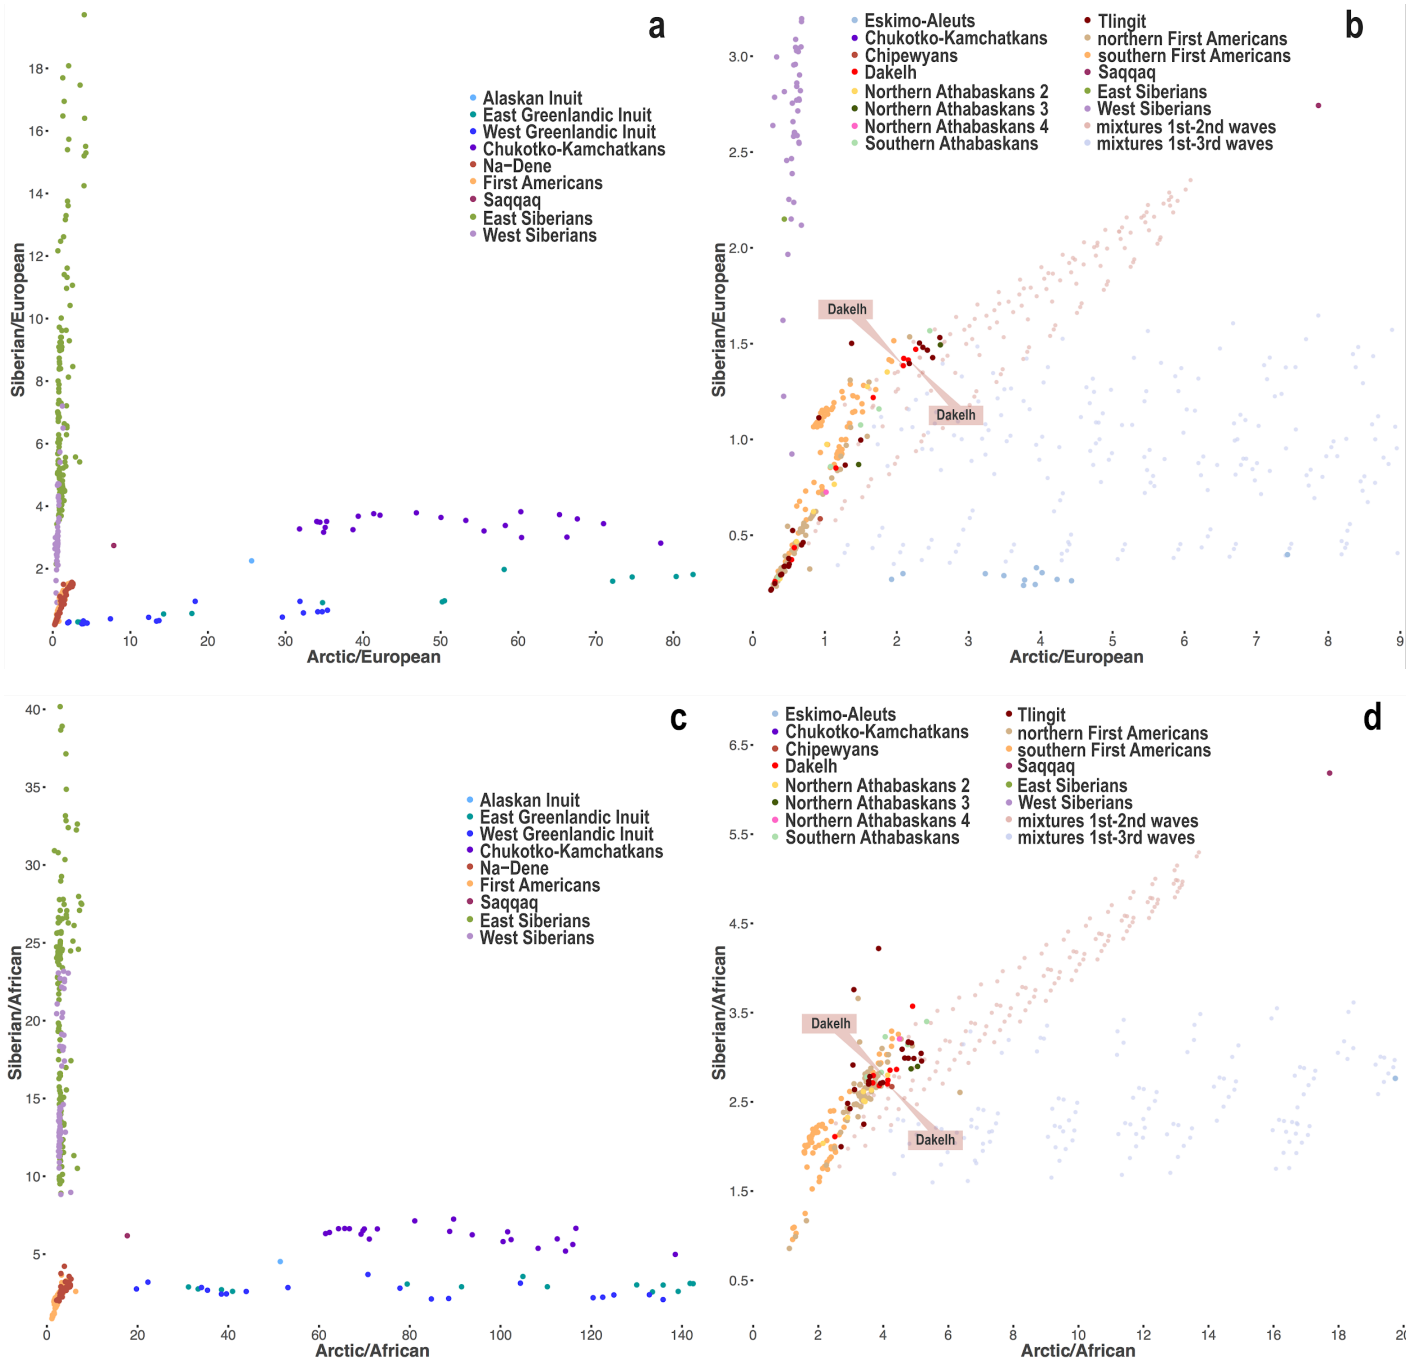

906 *References (for this section)*

907 Flegontov, P. *et al.* Genomic study of the Ket: A Paleo-Eskimo-related ethnic group with significant ancient  
 908 North Eurasian ancestry. *Sci. Rep.* **6**, 20768 (2016).  
 909 Lawson, D. J *et al.* Inference of population structure using dense haplotype data. *PLoS Genet.* **8**, 11–17 (2012).  
 910 Raghavan, M. *et al.* The genetic prehistory of the New World Arctic. *Science* **345**, 125832 (2014).  
 911 Raghavan, M. *et al.* Genomic evidence for the Pleistocene and recent population history of Native Americans.  
 912 *Science* **349**, 1–20 (2015).  
 913 Rasmussen, M. *et al.* Ancient human genome sequence of an extinct Palaeo-Eskimo. *Nature* **463**, 757–762  
 914 (2010).

915 **Supplementary Information section 7**

916 **Admixture inference with *GLOBETROTTER***

917

918 To interpret haplotype sharing in a more quantitative way, we analyzed putative admixture  
 919 events in Na-Dene using *GLOBETROTTER* (Hellenthal et al. 2014). *GLOBETROTTER* operates  
 920 on coancestry curves, generated from *ChromoPainter v.2* results (Hellenthal et al. 2014),  
 921 finds the best proxies of admixture partners in a dataset, determines admixture ratios and  
 922 dates up to two distinct admixture events. To make a complex mixture history of Na-Dene  
 923 amenable to *GLOBETROTTER* analysis, we pre-selected individuals based on low European  
 924 admixture and high Saqqaq HSS (selected individuals are marked on two-dimensional HSS  
 925 plots in Figs. S6.1d and S6.2d). Meta-populations or separate populations were alternatively  
 926 used as haplotype donors in the *ChromoPainter v.2* analyses. Substantiating our preliminary  
 927 conclusions, Saqqaq and First Peoples were determined to be the most likely admixture  
 928 partners for Na-Dene speakers, with the Saqqaq contribution ranging from 7% to 51%,  
 929 depending on the dataset and *GLOBETROTTER* set-up. Admixture dates were estimated as  
 930 follows: 479 – 1,534 ya (95% confidence interval), if meta-populations were used as  
 931 haplotype donors, and 1,073 – 2,202 ya, if populations were used as haplotype donors  
 932 (Table S7.1, Fig. S7.1). Although the Paleo-Eskimo admixture in Na-Dene speakers was  
 933 revealed by *GLOBETROTTER*, in line with other methods used in this study, the admixture  
 934 dates estimated by *GLOBETROTTER* are much later than those estimated by *Rarecoal*  
 935 (~4,400 – ~5,000 ya, Table S9.2).

936

|                                               |                                                               | dataset | HumanOrigins                                                | Illumina                                        | HumanOrigins                                                | HumanOrigins                                                |
|-----------------------------------------------|---------------------------------------------------------------|---------|-------------------------------------------------------------|-------------------------------------------------|-------------------------------------------------------------|-------------------------------------------------------------|
| <b><i>p</i>-value for any admixture event</b> | <b>haplotype donors</b>                                       |         | 9 meta-populations <sup>a)</sup>                            | 9 meta-populations <sup>a,b)</sup>              | 67 populations <sup>c)</sup>                                | 67 populations <sup>c,d)</sup>                              |
|                                               | <b>target population</b>                                      |         | Northern Athabaskans (2 Dakelh, 9 Chipewyans) <sup>e)</sup> | 2 Tlingit, 8 Northern Athabaskans <sup>e)</sup> | Northern Athabaskans (2 Dakelh, 9 Chipewyans) <sup>e)</sup> | Northern Athabaskans (2 Dakelh, 9 Chipewyans) <sup>e)</sup> |
|                                               | <b>GLOBETROTTER conclusion</b>                                |         | 0                                                           | 0                                               | 0.005                                                       | 0.005                                                       |
|                                               |                                                               |         | multiple dates                                              | one-date multiway                               | uncertain                                                   | uncertain                                                   |
| <b>coancestry curves</b>                      | <b>max. goodness-of-fit <sup>g)</sup></b>                     |         | 0.987                                                       | 0.503                                           | 0.908                                                       | 0.695                                                       |
|                                               | <b>max. fit improvement for two-date curves <sup>g)</sup></b> |         | 0.297                                                       | 0.148                                           | 0.276                                                       | 0.186                                                       |
| <b>two dates, admixture event 1</b>           | <b>inferred date, ya</b>                                      |         | 144                                                         | 522                                             | 139                                                         | 67                                                          |
|                                               | <b>95% confidence interval, ya</b>                            |         | 92 – 178                                                    | 315 – 898                                       | 29 – 249                                                    | 29 – 153                                                    |
|                                               | <b>source 1</b>                                               |         | 27% NAM                                                     | 47% NAM                                         | 32% Cree (NAM)                                              | 36% Ojibwa (NAM)                                            |
|                                               | <b>source 2</b>                                               |         | 73% SAM                                                     | 53% NAM                                         | 68% Nahua (SAM)                                             | 64% Nahua (SAM)                                             |
| <b>two dates, admixture event 2</b>           | <b>inferred date, ya</b>                                      |         | 916                                                         | 522                                             | 1,335                                                       | 1,574                                                       |
|                                               | <b>95% confidence interval, ya</b>                            |         | 479 – 1,534                                                 | N/A                                             | 739 – 3,487                                                 | 1,073 – 2,202                                               |
|                                               | <b>source 1</b>                                               |         | 28% Saqqaq                                                  | 7% Saqqaq                                       | 39% Iñupiat (E-A)                                           | 51% Saqqaq                                                  |
|                                               | <b>source 2</b>                                               |         | 72% SAM                                                     | 93% NAM                                         | 61% Cree (NAM)                                              | 49% Cree (NAM)                                              |



937 **Table S7.1.** The table shows fit statistics for *GLOBETROTTER* coancestry curves, as well as inferred mixture  
938 partners, mixture proportions, dates and their 95% confidence intervals. The following abbreviations are used  
939 for meta-populations: Eskimo-Aleut speakers, E-A; Northern First Peoples, NAM; Southern First Peoples, SAM.

940 <sup>a)</sup> The following non-overlapping meta-populations were used: 1/ the Saqqaq ancient genome and 2/ related  
941 Chukotko-Kamchatkan-speaking groups (abbreviated as C-K); 3/ Eskimo-Aleut speakers (Aleuts, Inuit, Iñupiat,  
942 Yup'ik, abbreviated as E-A); 4/ Northern First Peoples (NAM); 5/ Southern First Peoples (SAM); 6/ West  
943 Siberians (WSIB); 7/ East Siberians (ESIB); 8/ Southeast Asians (SEA); 9/ Europeans (EUR).

944 <sup>b)</sup> Individuals with >15% West Eurasian admixture components (Extended Data Fig. 8) were removed from the  
945 NAM meta-population.

946 <sup>c)</sup> Individuals with >15% West Eurasian admixture components (Extended Data Fig. 8) were removed from  
947 NAM populations, and the remaining NAM individuals were merged into one population.

948 <sup>d)</sup> Standardizing by a “null” individual was performed to test for consistency, as recommended by the  
949 *GLOBETROTTER* manual. This setting might be appropriate if the target population has undergone a  
950 bottleneck.

951 <sup>e)</sup> To make admixture history of the target population less complex and amenable to *GLOBETROTTER* analysis,  
952 only Na-Dene-speaking individuals with prior evidence of elevated Paleo-Eskimo ancestry (Figs. S6.1d, S6.2d)  
953 and with <10% West Eurasian ancestry estimated with *ADMIXTURE* (Extended Data Fig. 8) were used.

954 <sup>f)</sup> A maximal fit value across all curves is shown: two-date curves were considered if the overall conclusion was  
955 “multiple dates”, and one-date curves were considered in other cases. Most relevant coancestry curves  
956 illustrating the inferred admixture events are shown in Fig. S7.1.

957

958 **Fig. S7.1.** Coancestry curves: relative probability of jointly copying two genomic chunks from a pair of donors  
959 (y-axis) vs. genetic distance between the chunks in cM (x-axis). Several representative curves are shown for  
960 each model: those with the best fit and those involving admixture partners inferred with *GLOBETROTTER* or  
961 their closest proxies. Only curves reflecting the older Paleo-Eskimo/First Peoples admixture event are shown.  
962 Here is a list of *GLOBETROTTER* set-ups we explored: Northern Athabaskan speakers with meta-populations (a)  
963 or populations (c) as haplotype donors (the HumanOrigins dataset); Na-Dene speakers with meta-populations  
964 as haplotype donors (the Illumina dataset) (b). Results under an alternative setting (normalization by a ‘null  
965 individual’) are also shown for populations as haplotype donors (d). Original data are shown in black, and  
966 curves approximating two admixture events with different dates – in red, two events with a single date – in  
967 green, and one event – in blue. Composition of target Na-Dene populations is given in Table S7.1, and Figs.  
968 S6.1d, S6.2d. The following meta-populations were used as haplotype donors: 1/ Saqqaq, 2/ related Chukotko-  
969 Kamchatkan speakers (abbreviated as C-K); 3/ Eskimo-Aleut speakers (E-A); 4/ Northern First Peoples (NAM);  
970 5/ Southern First Peoples (SAM); 6/ West Siberians (WSIB); 7/ East Siberians (ESIB), 8/ Southeast Asians (SEA);  
971 9/ Europeans (EUR).

**A**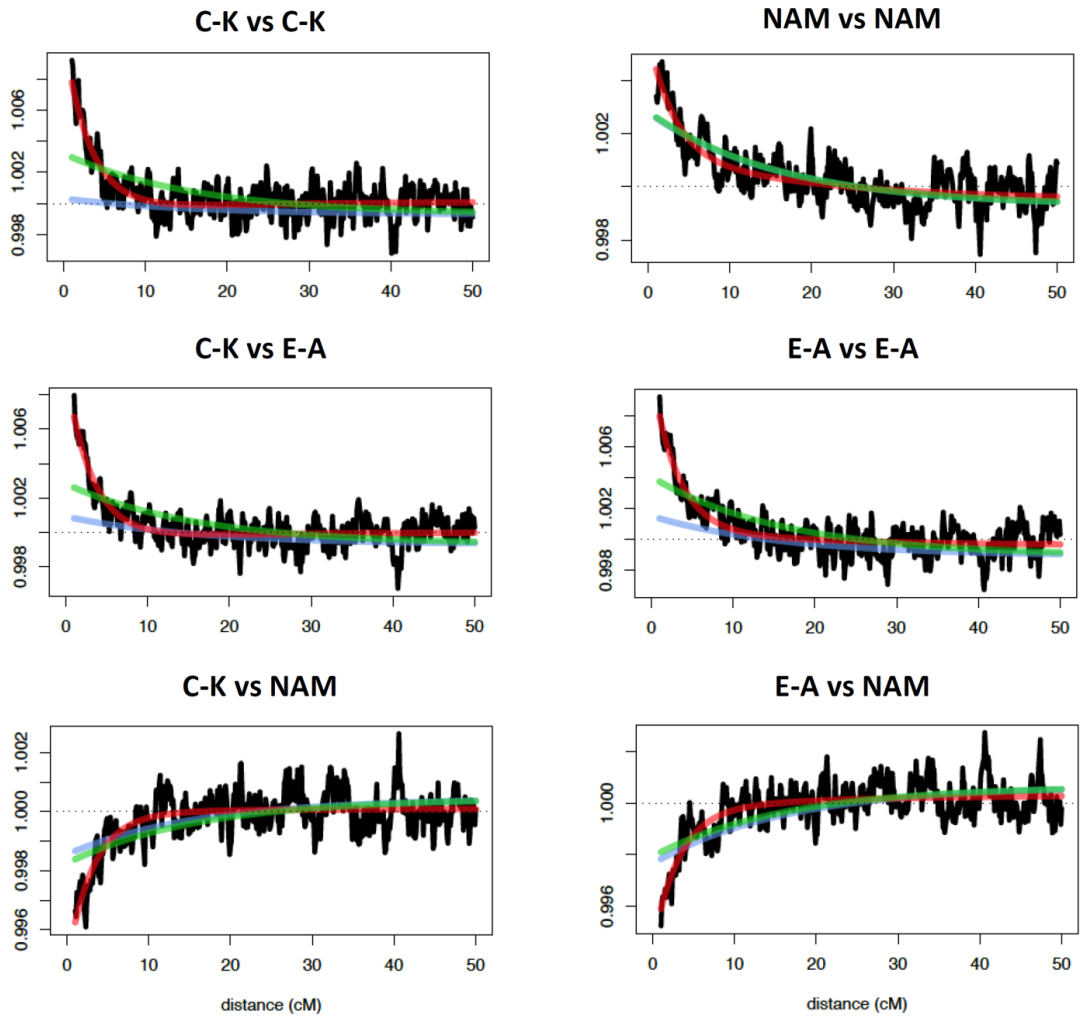

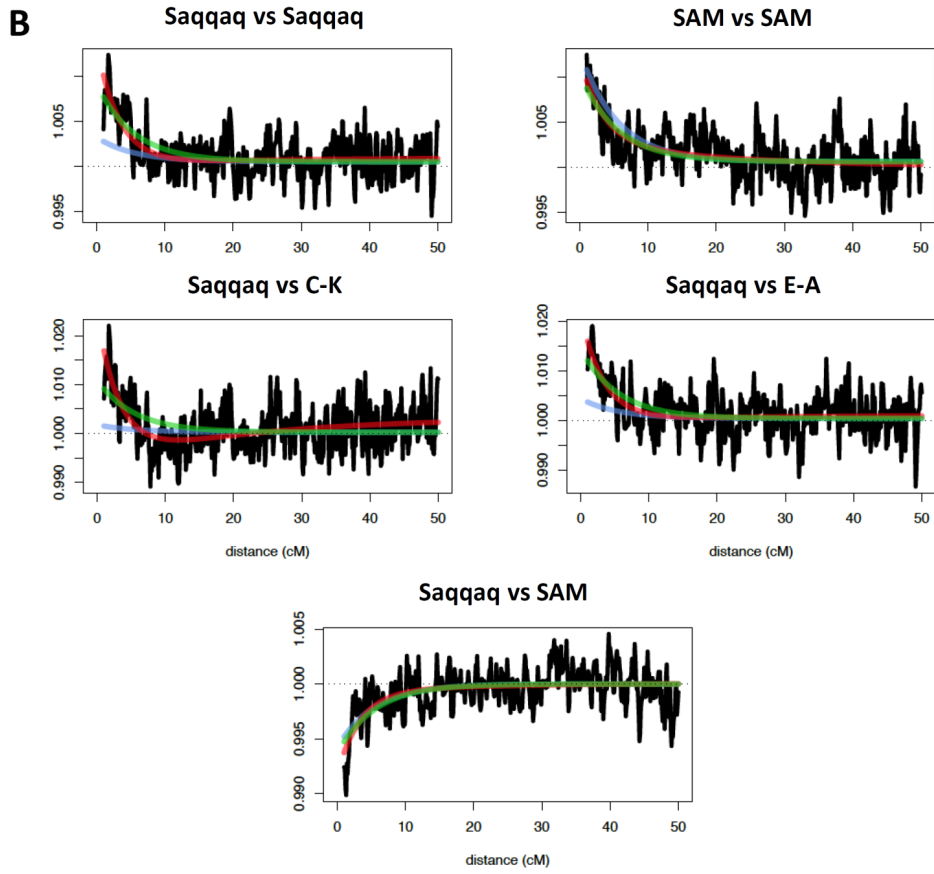

973

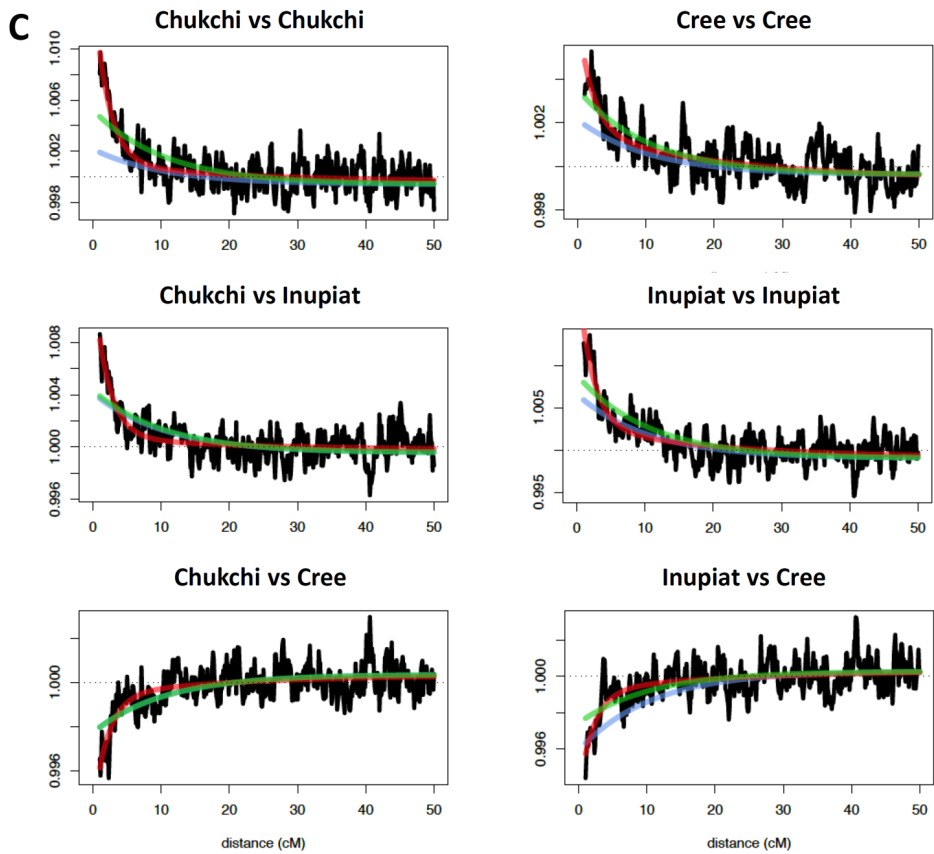

974

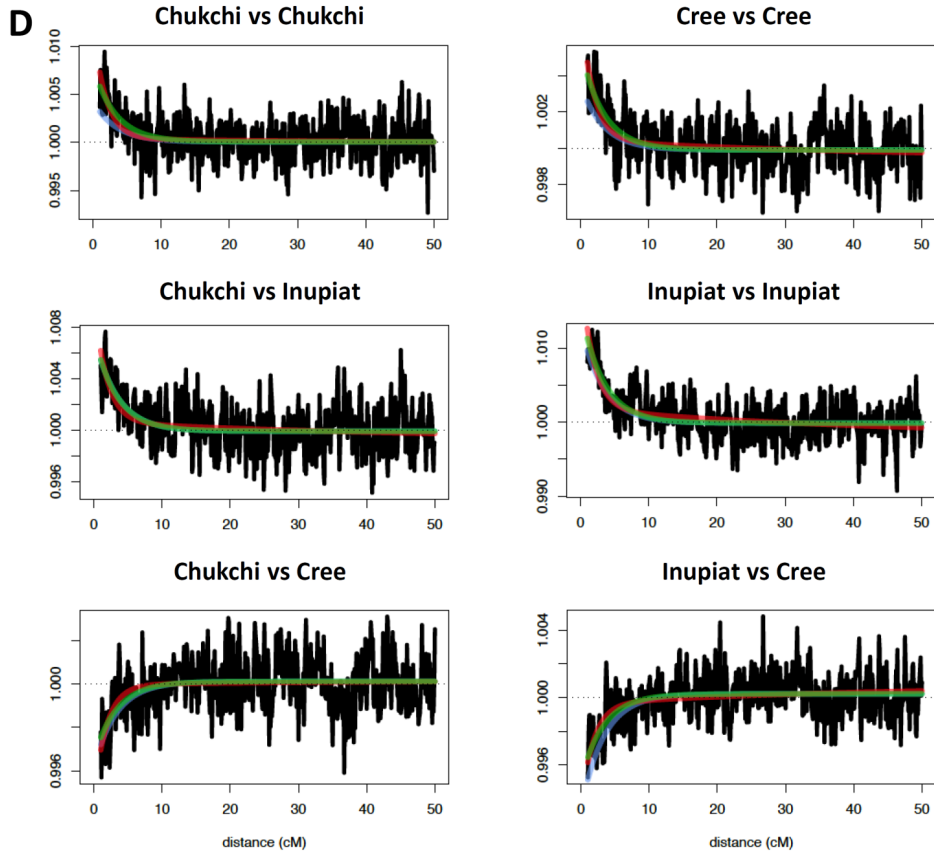

975

976

977 *References (for this section)*

978 Hellenthal, G. *et al.* A genetic atlas of human admixture. *Science* **343**, 747–751 (2014).

979

980 **Supplementary Information section 8**

981 **Rare allele sharing statistics**

982

983 To explore PPE ancestry in American and Beringian populations in a model-free way, we  
 984 used rare allele sharing statistics. For this analysis, we used all segregating sites in the  
 985 Simons Genome Diversity panel (Mallick et al. 2016) as well as in the present-day data from  
 986 Raghavan et al. (2015), restricting to those sites at which at least 90% of individuals in both  
 987 datasets independently have non-missing data. We also filtered out sites based on genome  
 988 mappability, as defined in the PSMC pipeline (Li and Durbin 2011). This resulted in a dataset  
 989 of 14,740,572 segregating sites in the combined dataset. The population composition of the  
 990 dataset is summarized in Table S8.1.

991

| Abb.         | Full Name                    | Populations <sup>1)</sup>                                                                                                                                    | Nr of samples |
|--------------|------------------------------|--------------------------------------------------------------------------------------------------------------------------------------------------------------|---------------|
| AFR          | Africans                     | Bantu Herero, Bantu Kenya, Bantu Tswana, Biaka, Dinka, Esan, Gambian, Ju 'hoan North, Khomani San, Luhya, Luo, Mandenka, Masai, Mbuti, Mende, Somali, Yoruba | 39            |
| EUR          | Europeans                    | Basque, Bergamo, Bulgarian, Crete, Czech, English, Estonian, French, Greek, Hungarian, Norwegian, Orcadian, Polish, Sardinian, Spanish, Tuscan               | 33            |
| SEA          | Southeast Asians             | Ami, Atayal, Burmese, Cambodian, Dai, Kinh, Lahu, Miao, She, Thai                                                                                            | 21            |
| SIB          | Core Siberians               | Nivkh, Altaian, Buryat, Even, Ket, Mansi, Tubalar, Ulchi, Yakut                                                                                              | 22            |
| C-K          | Chukotko-Kamchatkan speakers | Itelmen, Koryak, Chukchi                                                                                                                                     | 4             |
| P-E          | Paleo-Eskimo                 | Saqqaq                                                                                                                                                       | 1             |
| ALE          | ancient Aleut                | ancient Aleut                                                                                                                                                | 1             |
| ESK          | Eskimo speakers              | Yup'ik from Chukotka, East and West Greenlandic Inuit                                                                                                        | 9             |
| ATH          | Northern Athabaskan speakers | Dakelh, Chipewyan, ancient Athabaskan                                                                                                                        | 5             |
| SAM          | Southern First Peoples       | Aymara, Chane, Huichol, Karitiana, Mayan, Mixe, Mixtec, Piapoco, Pima, Quechua, Surui, Yukpa, Zapotec                                                        | 29            |
| <b>Total</b> |                              |                                                                                                                                                              | <b>164</b>    |

992 **Table S8.1:** A table listing all modern samples and groups used in the rare allele sharing analysis. Data is from  
 993 the two sources: Raghavan et al. (2015) and the Simons Genome Diversity Project data set (Mallick et al.  
 994 2016), as indicated in Supplementary Table 4.

995 We then sampled pseudo-haploid genotypes on three ancient shotgun genomes  
 996 (Saqqaq, I0719 called “Ancient Aleut” and I5319 called “Ancient Athabaskan”), the latter  
 997 two of which are described in this study for the first time. Here, we used a pseudo-haploid  
 998 calling method and i) required a minimum of 3 reads at each site, ii) restricted to biallelic  
 999 sites, iii) called the allele that was supported by the majority of reads at that site. Since this  
 1000 method is subtly dependent on coverage (high-coverage positions will have a stronger  
 1001 reference bias than low-coverage positions), we first downsampled all query positions to  
 1002 the required minimum coverage of 3, respectively.

1003 To quantify rare allele sharing, we developed the rare allele sharing statistics (RASS).  
 1004 Essentially, RASS is similar to an outgroup- $f_3$ -statistic, but ascertained on rare derived alleles  
 1005 in a set of reference populations. Specifically, we define

1006 
$$RASS(x, y; \{\text{References, Outgroup}\}) = \frac{1}{L} \sum_i x_i y_i$$

1007 where the sum runs over all sites with derived allele count below some cutoff (say 5 or less)  
 1008 within the *Reference* and *Outgroup* populations,  $x_i$  is the derived allele frequency in the test  
 1009 individual,  $y_i$  is the derived allele frequency in the reference population, and  $L$  is the  
 1010 number of sites in the sum (excluding missing data). Here, the *Outgroup* (Africans) is used to  
 1011 polarize derived vs. ancestral alleles – that is, we look at the outgroup population, and take  
 1012 the majority allele in that outgroup population to specify which should be the majority allele  
 1013 for the ascertainment. If the majority of outgroup chromosomes have the non-reference  
 1014 allele, then the ascertainment is done on the reference allele being rare (instead of the non-  
 1015 reference allele).

1016 The following outgroup and reference meta-populations were used (Table S8.1):  
 1017 Africans (39 ind.), Europeans (33 ind.), Southeast Asians (21 ind.), Siberians (22 ind.),  
 1018 Chukotko-Kamchatkan (C-K) speakers (4 ind. including one Chukchi ind.). Importantly, the  
 1019 ascertainment on allele frequency is done only within the reference and outgroup  
 1020 populations, not within the test individuals. Here, reference populations included non-  
 1021 American populations only, while test populations included American populations and  
 1022 Chukotkan Yup'ik, closely related to American Inuit. Because of this ascertainment rule,  
 1023 RASS between test individuals and reference populations is not affected by genetic drift  
 1024 within the test individuals since putative admixture events, and we can therefore formally  
 1025 test for admixture models within the test samples based on RASS (see below). For present-  
 1026 day and ancient First Peoples, Athabaskan speakers, Paleo-Eskimos (P-E), and Eskimo-Aleut  
 1027 (E-A) speakers we estimated RASS vs. Siberian and C-K reference meta-populations. Since  
 1028 among C-K groups Chukchi demonstrate the highest level of E-A admixture (Fig. 1a,  
 1029 Extended Data Figs. 2 and 8, sections 5, 10), for some analyses we excluded the Chukchi  
 1030 individual.

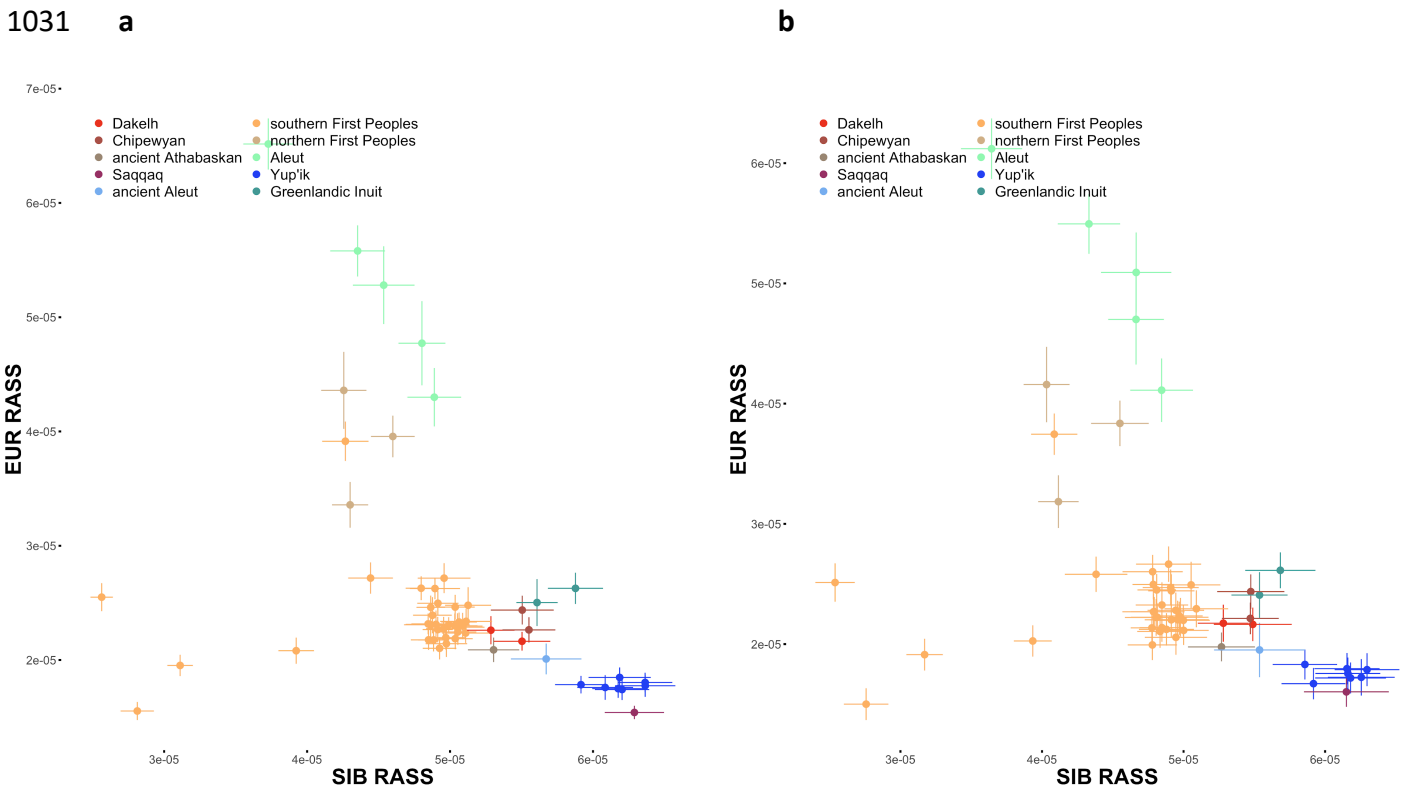

1032

1033 **Fig. S8.1.** Two-dimensional plots of European (EUR) and Siberian (SIB) rare allele sharing statistics (RASS). Rare  
 1034 alleles occurring from 2 to 10 times in the reference set of 238 haploid genomes (0.8-4.2% frequency)

1035 contributed to the statistics; the full **(a)** and transversion-only **(b)** datasets were used. The sample size for this  
1036 analysis equals 238 + 2 haploid genomes in a target individual since individuals were analyzed separately.  
1037 Standard deviations were calculated using a jackknife approach with chromosomes used as resampling blocks.  
1038 Single standard error intervals and means are plotted. Populations and meta-populations are color-coded  
1039 according to the legend.

1040

1041 We first removed all test individuals with substantial European admixture. To this  
1042 end, we looked at RASS with SIB vs. EUR (see Fig. S8.1) and identified individuals with higher  
1043 than expected EUR RASS, as compared to the bulk of Native American individuals. After  
1044 inspection of Fig. S8.1, we used  $>3 \times 10^{-5}$  as the RASS cutoff to mark individuals as admixed.  
1045 In addition, we removed Native American individuals that were outliers according to the SIB  
1046 RASS as they might have a low degree of African admixture (we used  $<4.5 \times 10^{-5}$  as the cutoff  
1047 to mark individuals as admixed). Since the African meta-population was used as an outgroup  
1048 for RASS calculation, we could not measure African RASS directly.

1049 We then investigated RASS with C-K vs. RASS with SIB for the transversion-only  
1050 dataset, as shown in Fig. S8.2. First, we observe that all Athabaskans (four present-day and  
1051 one ancient individual), are shifted away from the cluster of First Peoples, towards the  
1052 ancient Saqqaq individual. To explicitly test admixture scenarios, we simulated admixture  
1053 points of 5%, 10%, ..., 75% Saqqaq admixture in Native Americans. The simulated points are  
1054 simply linear combinations of the positions on the plot of various First Peoples individuals  
1055 and Saqqaq. Importantly, RASS of Athabaskans matches admixture points between 29% and  
1056 38%. The ancient Athabaskan is consistent with a slightly higher level of Saqqaq admixture  
1057 of 42%, in agreement with other analyses (Fig. 1, Extended Data Figs. 2-4). Both C-K and  
1058 Siberian RASS for the ancient Aleut individual I0719 sequenced by the shotgun approach  
1059 (2.3x average coverage, Extended Data Table 1) are also perfectly consistent with a First  
1060 Peoples/Paleo-Eskimo admixture (~65% Saqqaq admixture). In contrast, Inuit and especially  
1061 Yup'ik individuals are shifted to the right on the x-axis, i.e. they demonstrate elevated C-K  
1062 RASS not expected under the simple First Peoples/Paleo-Eskimo admixture scenario.

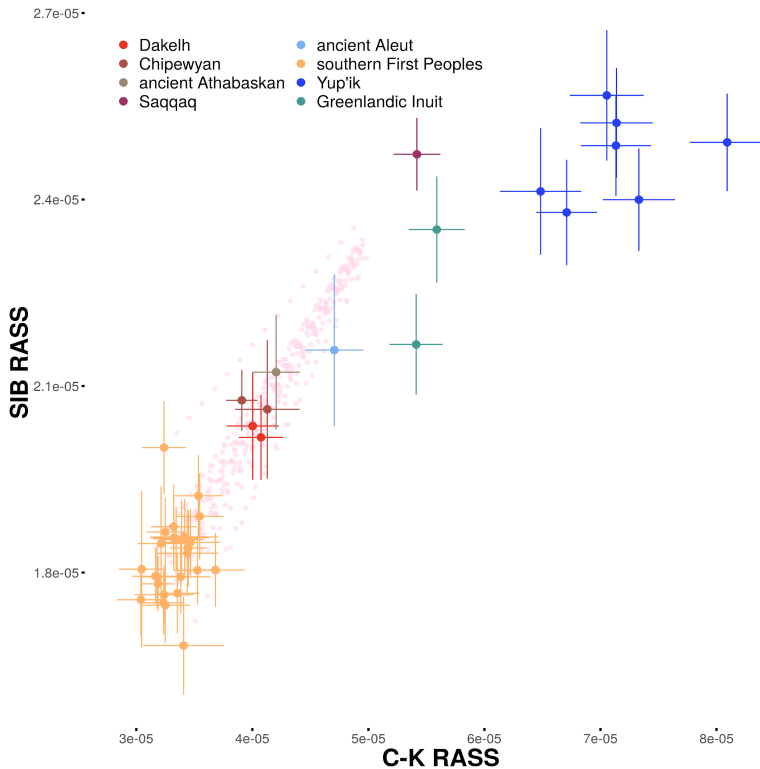

**Fig. S8.2.** Two-dimensional plot of Chukotko-Kamchatkan (C-K) and Siberian (SIB) rare allele sharing statistics (RASS). Rare alleles occurring from 2 to 5 times in the reference set of 238 haploid genomes (0.8-2.1% frequency) contributed to the statistics; the Chukchi individual was dropped from the C-K group, and the transversion-only dataset was used. The sample size for this analysis equals 238 + 2 haploid genomes in a target individual since individuals were analyzed separately. Standard deviations were calculated using a jackknife approach with chromosomes used as resampling blocks. Single standard error intervals and means are plotted. Populations and meta-populations are color-coded according to the legend. RASS for simulated mixtures of any present-day southern Native American individual and the Saqqaq individual (from 5% to 75% Saqqaq ancestry, with 5% increments) are plotted as semi-transparent pink circles.

1088

1089 E-A admixture found in all C-K populations (section 10), but especially high in  
 1090 Chukchi (Fig. 1a, Extended Data Figs. 2 and 8, section 5), influences RASS for the ancient  
 1091 Aleut individual. This effect is observed when the Chukchi individual is included into the C-K  
 1092 reference group (Fig. S8.3b,c), especially in the case of the 2 to 5 allele count range (Figs.  
 1093 S8.2 and S8.3c). The fact that E-A admixture in C-K influences results strongly when only the  
 1094 rarest alleles are considered is not surprising since the bidirectional E-A/C-K admixture has  
 1095 been dated to 1,700-2,300 ya using *Rarecoal* (Table. S9.2), and it is expected to post-date  
 1096 the emergence of the first Neo-Eskimo archaeological culture on the Chukotkan side of  
 1097 Bering Strait ca. 2200 calBP (see the Discussion). In contrast, the P-E admixture events in E-A  
 1098 and Na-Dene have both been dated to roughly 4,400-4,900 ya using *Rarecoal* (Table S9.2)  
 1099 and to 2,700-4,900 ya using the *ALDER* method (Table S12.1). Therefore, the signal of the  
 1100 most recent event becomes stronger when the rarest alleles (reflecting recent mutations in  
 1101 most cases) are considered.

1102 The C-K reference group can be replaced by the Saqqaq individual (SNP genotypes  
 1103 called as described above), see Fig. S8.4. This approach does not allow analysis of low-  
 1104 coverage ancient samples, but the signal of P-E admixture in Na-Dene speakers remains.

1105 Using the same genomic dataset, we also calculated outgroup  $f_3$ -statistics:

$$1106 \quad f_3(x, y; O) = \frac{1}{L} \sum_i (o - x_i)(o - y_i)$$

1107 where  $x_i$  is the allele frequency in the test population,  $y_i$  is the allele frequency in the  
 1108 reference population, and  $o_i$  is the allele frequency in the outgroup (the African meta-  
 1109 population). Again,  $L$  is the number of sites in the sum. This statistic takes into account all  
 1110 sites, not only rare ones. It is clear that the resolution provided by C-K, Saqqaq and Siberian



1111 RASS is much higher than that of outgroup statistics  $f_3$ (Africans; C-K, an American/E-A/P-E  
1112 individual),  $f_3$ (Africans; Saqqaq, an American/E-A/P-E individual), and  $f_3$ (Africans; Siberians,  
1113 an American/E-A/P-E individual) (Fig. S8.5). Chipewyans and Dakelh are not distinguishable  
1114 from First Peoples using outgroup  $f_3$ -statistics, but are distinguishable using RASS.

1115 RASS and outgroup  $f_3$ -statistics are correlated, especially if the rare allele count  
1116 range from 2 to 10 is used (Fig. S8.6).

1117

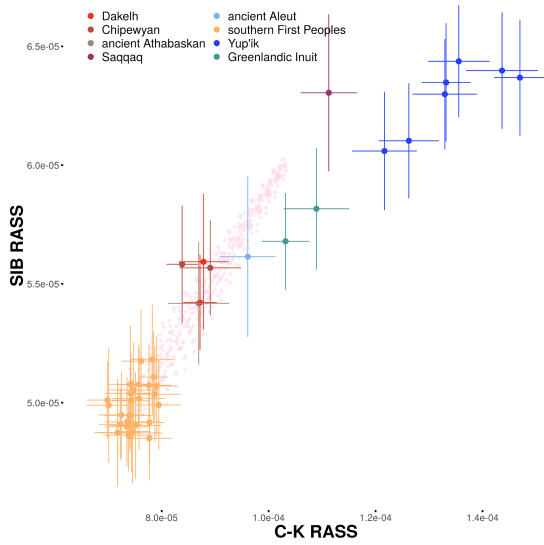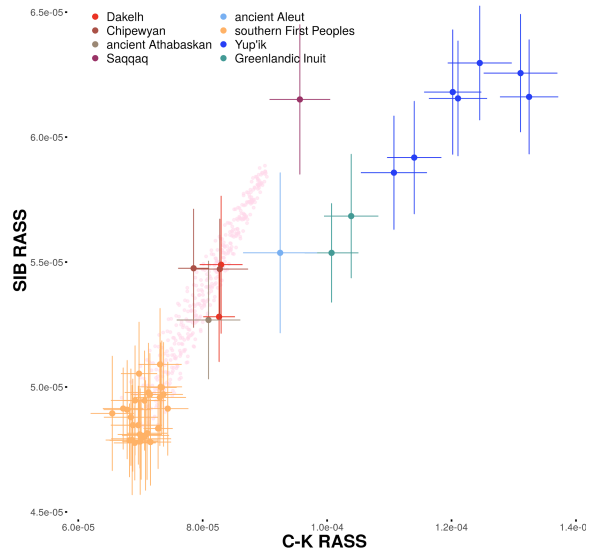

1119

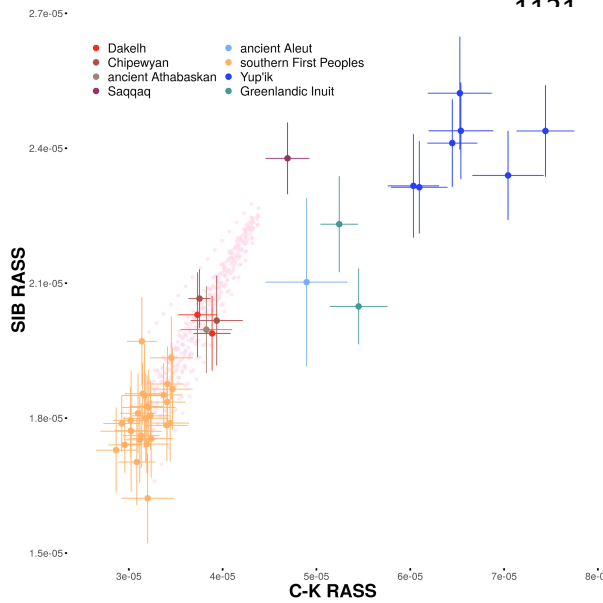

1121

1140

**Fig. S8.3.** Two-dimensional plots of Chukotko-Kamchatkan (C-K) and Siberian (SIB) rare allele sharing statistics (RASS). Rare alleles occurring from 2 to 10 (**a**, **b**) or 5 times (**c**) in the set of reference populations contributed to the statistics; the transversion-only dataset was used. The Chukchi individual was alternatively included into the C-K reference group (**b**, **c**) or dropped (**a**). The sample size for this analysis equals 238 + 2 haploid genomes in a target individual since individuals were analyzed separately. Standard deviations were calculated using a jackknife approach with chromosomes used as resampling blocks. Single standard error intervals and means are plotted. Populations and meta-populations are color-coded according to the legend. RASS for simulated mixtures of any present-day southern Native American individual and the Saqqaq individual (from 5% to 75% Saqqaq ancestry, with 5% increments) are plotted as semi-transparent pink circles.

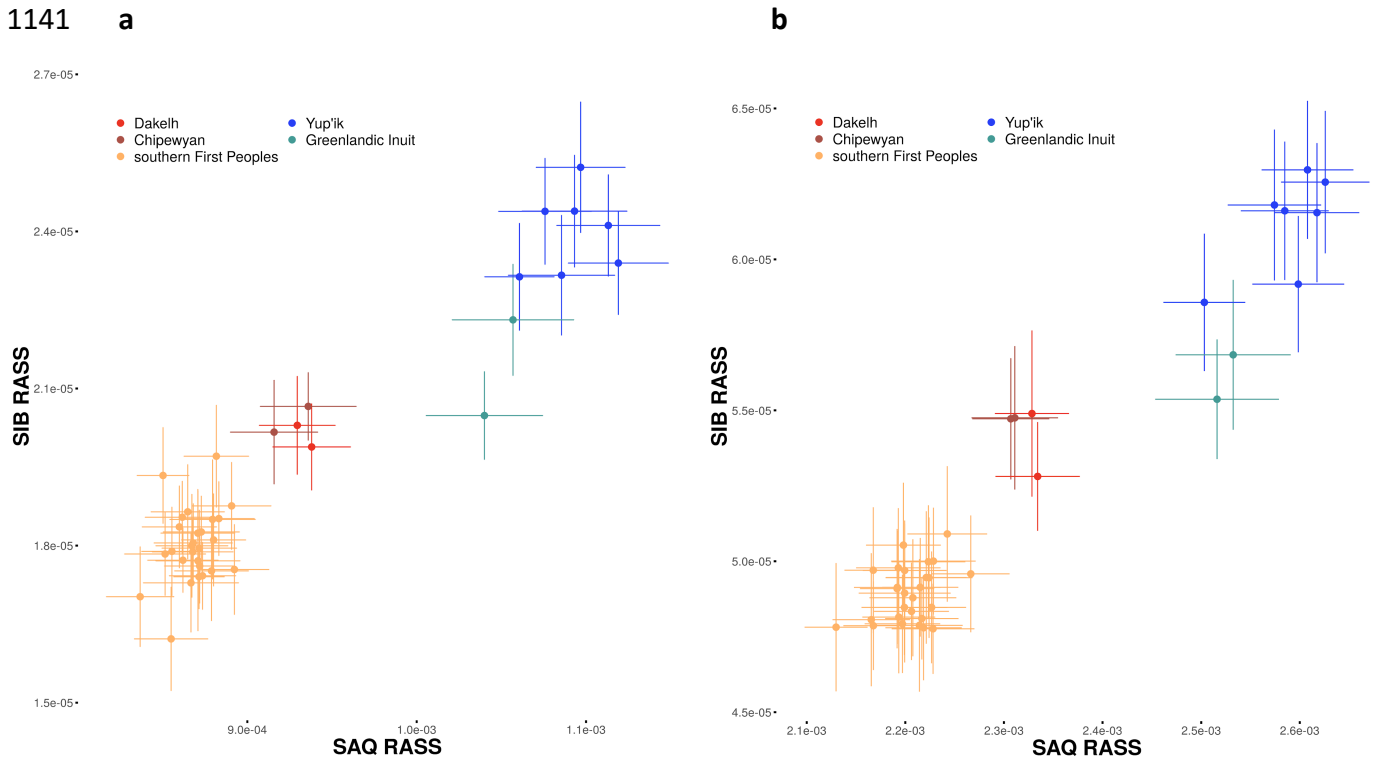

1150 **a**

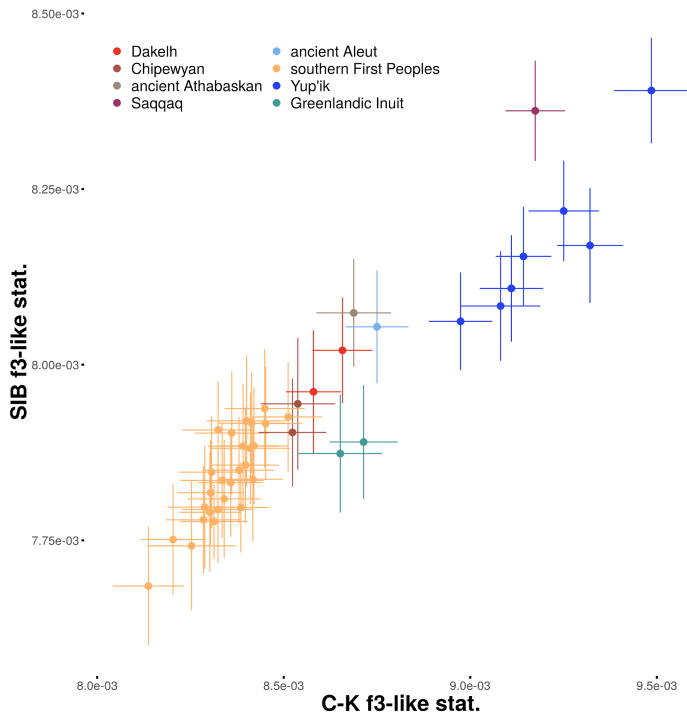

**b**

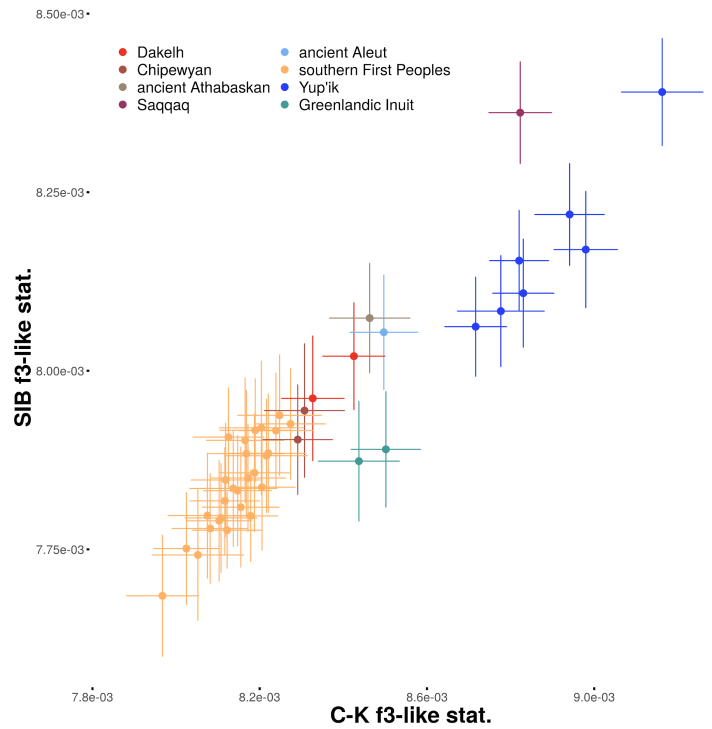

1151 **c**

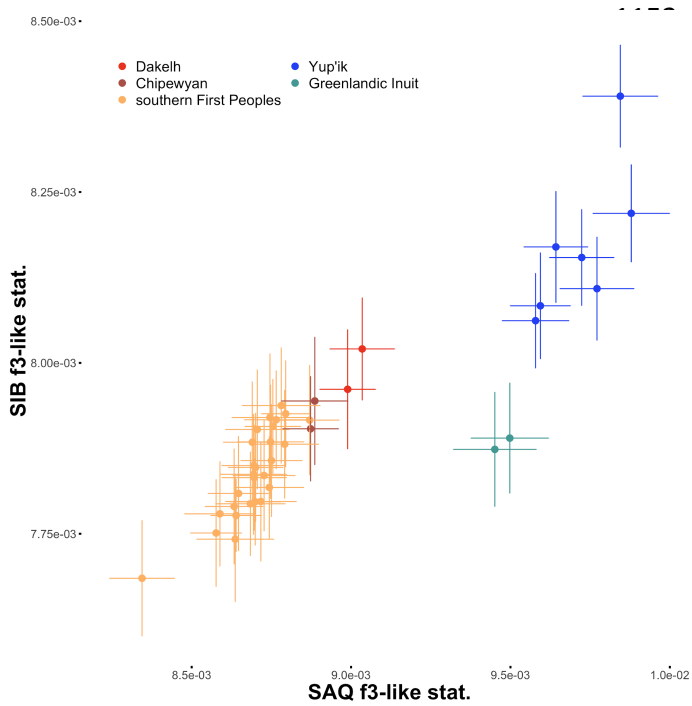

**Fig. S8.5.** Two-dimensional plots of Chukotko-Kamchatkan (C-K) and Siberian (SIB) (**a, b**) or Saqqaq (SAQ) and Siberian (SIB) (**c**) outgroup  $f_3$ -statistics. The Chukchi individual was alternatively included into the C-K reference group (**b**) or dropped (**a**); the transversion-only dataset was used. The sample size for this analysis equals 238 + 2 haploid genomes in a target individual since individuals were analyzed separately. Standard deviations were calculated using a jackknife approach with chromosomes used as resampling blocks. Single standard error intervals and means are plotted. Populations and meta-populations are color-coded according to the legend.

1170

1171

a

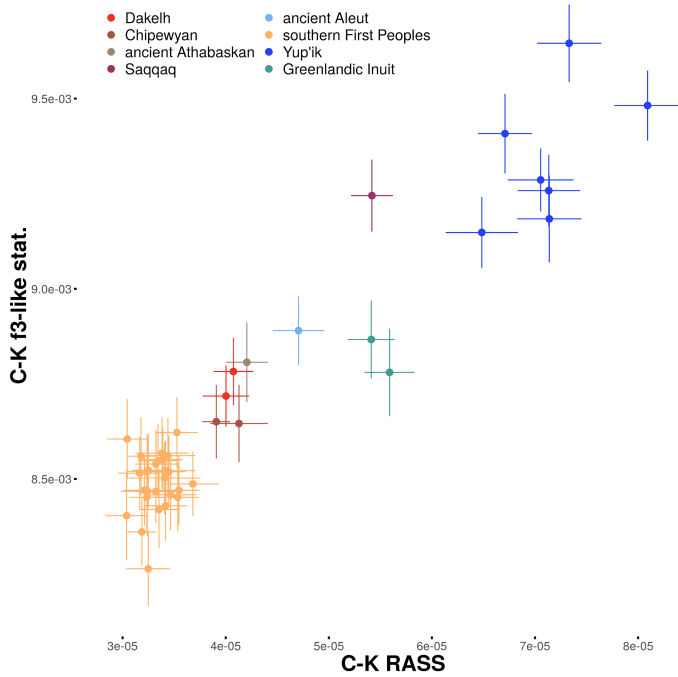

b

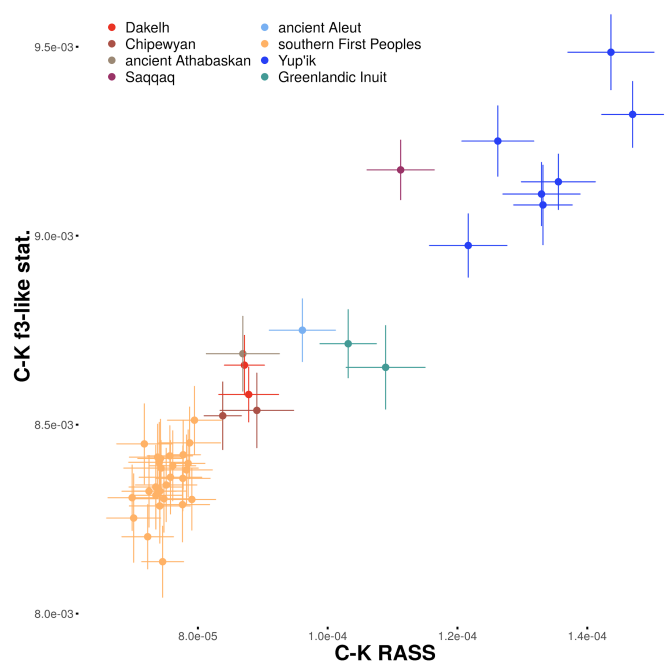

1173

1174 **Fig. S8.6.** Two-dimensional plots of Chukotko-Kamchatkan (C-K) rare allele sharing statistics vs. outgroup  $f_3$ -  
 1175 statistics. Rare alleles occurring from 2 to 5 (a) or 10 times (b) in the set of reference populations contributed  
 1176 to RASS; the transversion-only dataset was used. The Chukchi individual was not included into the C-K  
 1177 reference group. The sample size for this analysis equals 238 + 2 haploid genomes in a target individual since  
 1178 individuals were analyzed separately. Standard deviations were calculated using a jackknife approach with  
 1179 chromosomes used as resampling blocks. Single standard error intervals and means are plotted. Populations  
 1180 and meta-populations are color-coded according to the legend.

1181

### 1182 *References (for this section)*

- 1183 Li, H. & Durbin, R. Inference of human population history from individual whole-genome sequences. *Nature*  
 1184 **475**, 493–496 (2011).  
 1185 Mallick, S. *et al.* The Simons Genome Diversity Project: 300 genomes from 142 diverse populations. *Nature*  
 1186 **538**, 201–206 (2016).  
 1187 Raghavan, M. *et al.* Genomic evidence for the Pleistocene and recent population history of Native Americans.  
 1188 *Science* **349**, 1–20 (2015).  
 1189

1190 **Supplementary Information section 9**

1191 **Demographic modeling with *Rarecoal***

1192

1193 **Rarecoal**

1194 *Rarecoal* is a software that implements a fast algorithm to estimate the joint site frequency  
1195 spectrum for rare alleles (Schiffels et al. 2016). Since the initial report in Schiffels et al. 2016,  
1196 we have improved the software substantially: We have added pulse-like admixture events  
1197 to be able to model admixture graphs, and we have significantly optimized crucial parts of  
1198 the program. The updated mathematical derivations of the model are included as a PDF  
1199 document in the repository: <https://github.com/stschiff/rarecoal>. We also built in a  
1200 regularization for population size changes, which penalizes large changes of the population  
1201 size and helps to avoid overfitting.

1202

1203 **Data**

1204 In the following analysis, we will use the abbreviations for meta-populations shown in Table  
1205 S9.1.

1206

| Abb.         | Full Name                    | Populations                                                                                                                                    | Nr of samples |
|--------------|------------------------------|------------------------------------------------------------------------------------------------------------------------------------------------|---------------|
| EUR          | Europeans                    | Basque, Bergamo, Bulgarian, Crete, Czech, English, Estonian, French, Greek, Hungarian, Norwegian, Orcadian, Polish, Sardinian, Spanish, Tuscan | 33            |
| SEA          | Southeast Asians             | Ami, Atayal, Burmese, Cambodian, Dai, Kinh, Lahu, Miao, She, Thai                                                                              | 21            |
| SIB          | Core Siberians               | Nivkh, Altaian, Buryat, Even, Ket, Mansi, Tubalar, Ulchi, Yakut                                                                                | 22            |
| C-K          | Chukotko-Kamchatkan speakers | Itelmen, Koryak                                                                                                                                | 3             |
| ALE          | Aleuts                       | Aleut                                                                                                                                          | 5             |
| ESK          | Eskimo speakers              | Yup'ik from Chukotka, East and West Greenlandic Inuit                                                                                          | 9             |
| ATH          | Northern Athabaskan speakers | Dakelh, Chipewyan                                                                                                                              | 4             |
| NAM          | Northern First Peoples       | Cree, Tsimshian                                                                                                                                | 3             |
| SAM          | Southern First Peoples       | Aymara, Mixe, Mixtec, Piapoco, Quechua, Yukpa, Zapotec                                                                                         | 14            |
| <b>Total</b> |                              |                                                                                                                                                | <b>114</b>    |

1207 **Table S9.1:** A table listing all modern samples and groups used in the *Rarecoal* analysis. Data is from the two  
1208 sources: Raghavan et al. (2015) and the Simons Genome Diversity Project data set (Mallick et al. 2016), as  
1209 indicated in Supplementary Table 4.

1210

1211 In the following model fits, we use “rarecoal maxl” to obtain maximum likelihood fits. For  
1212 our final models, we also use “rarecoal mcmc” to obtain credibility intervals for parameters.  
1213 We fit rare allele sharing histograms with maximum allele count of 4 in all modeled  
1214 populations (corresponding to a maximum allele frequency of 1.7% in the full data set). This  
1215 corresponds to 66% of all mutations in the full data set, i.e. much higher than the allele  
1216 frequency due to the strong skew of the allele frequency spectrum towards rare alleles.

1217 In order to check model fits, we use the Rare Allele Sharing statistics (RASS) as

1218 defined in the Methods section. RASS between two populations X and Y is defined as

1219 
$$RASS(X, Y) = \frac{1}{L} \sum_i x_i y_i,$$

1220 where  $x_i$  and  $y_i$  are the derived allele frequencies in populations X and Y, respectively. The  
 1221 sum runs over all sites with total allele count less than or equal to 4 in the entire dataset  
 1222 considered in the fit, and L is the number of those sites. Note that RASS can be computed  
 1223 also with X=Y, in which case it describes rare allele sharing between individuals from the  
 1224 same population. In addition, we also consider the rate of singletons per population as a  
 1225 statistic to compare fits with data (see panels c in figures below).

1226

1227 **Fitting a simple split model for Europeans and Southeast Asians**

1228 We started with only two populations, Europeans (EUR) and Southeast Asians (SEA), and  
 1229 fitted a simple model with 4 parameters (a single split time, two population sizes in the two  
 1230 extant branches, and one population size in the ancestral branch). The result yields –  
 1231 unsurprisingly – a very good fit with a split time of around 45,000 years ago (ya) (Fig. S9.1).

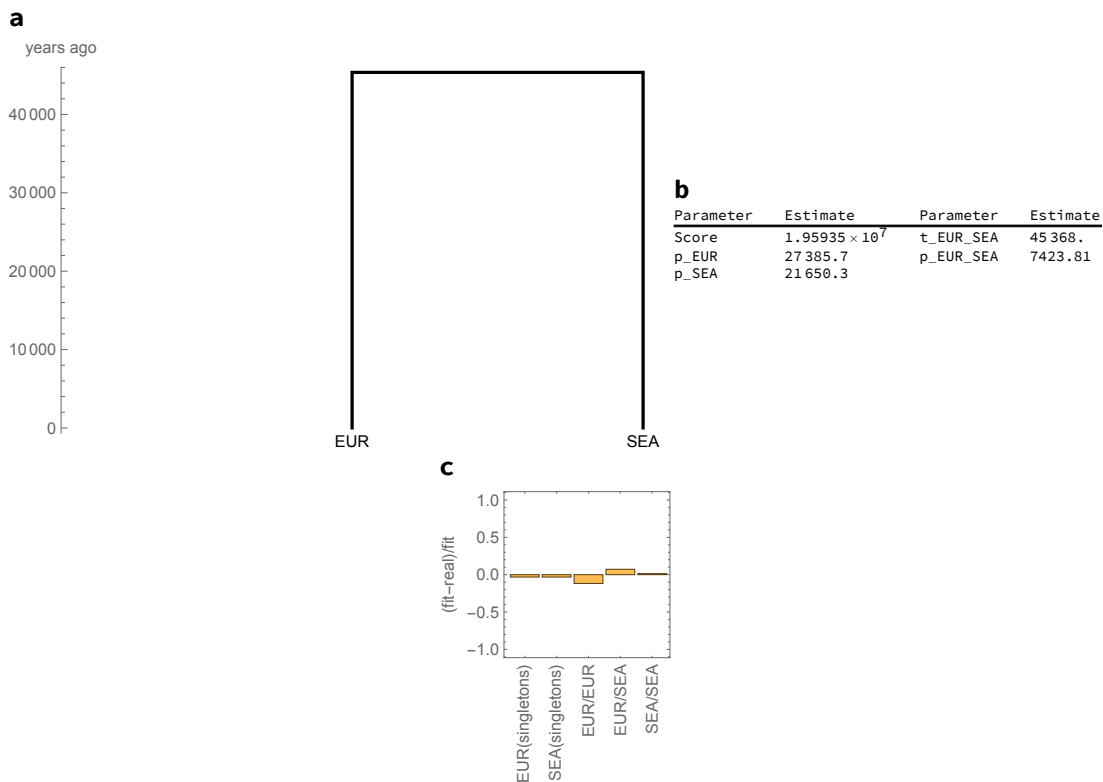

1232

1233 **Fig. S9.1.** A model connecting Europeans (EUR) and Southeast Asians (SEA). A schematic indicating the tree (a),  
 1234 the parameters (b) and the fit deviation between the model and the data (c).

1235

1236 As shown in Fig. S9.1, we summarize models using a schematic (a), a table with the  
 1237 parameters (b), and the relative deviation between the model and the data in terms of rare  
 1238 allele sharing statistics (RASS, see above and the Methods). Here, the statistics  
 1239 EUR(singletons) and SEA(singletons) indicate simply the deviation of the fit in terms of  
 1240 frequency of singletons in both populations. EUR/EUR and SEA/SEA indicate deviations  
 1241 between the data and the model for mutations shared within each group, and EUR/SEA  
 1242 indicates the fit deviation for allele sharing across groups.

1243 Parameter names (Fig. S9.1b) starting with “p” denote population sizes, and those  
 1244 starting with “t” denote split times. By “Score” we denote the negative log-likelihood: the  
 1245 lower this number, the better the fit. The inferred population sizes and split times are scaled  
 1246 to real time and size using a mutation rate of  $1.25 \times 10^{-8}$  (Scally and Durbin 2012) and a  
 1247 generation time of 29 years (Fenner 2005, Scally and Durbin 2012).

1248

1249 **Adding Native Americans**

1250 We next added Southern First Peoples (SAM) onto the tree. From our *qpGraph* analysis (see  
 1251 section 10), we know that First Peoples inherit a separate Eurasian lineage, which from  
 1252 previous publications is known as *Ancient North Eurasian* (ANE) (Patterson et al. 2012,  
 1253 Raghavan et al. 2014a). We model this lineage as a “ghost” population that split off from the  
 1254 EUR branch. The inferred model fits well (Fig. S9.2), although the inferred ANE contribution  
 1255 to Native Americans (here 8%) is far below the estimates in our *qpGraph* models, which are  
 1256 around 40% (Fig. S10.5). We believe this may be due to the lack of the Late Pleistocene  
 1257 Native American bottleneck, which we will add further below when adding other Native  
 1258 American populations. The EUR/ANE split time at 13.6 kya is also unrealistically late. Most  
 1259 likely this effect is observed because instead of ancient genomes we used high-coverage  
 1260 genomes of present-day Europeans having substantial ANE-related admixture (Haak et al.  
 1261 2015).

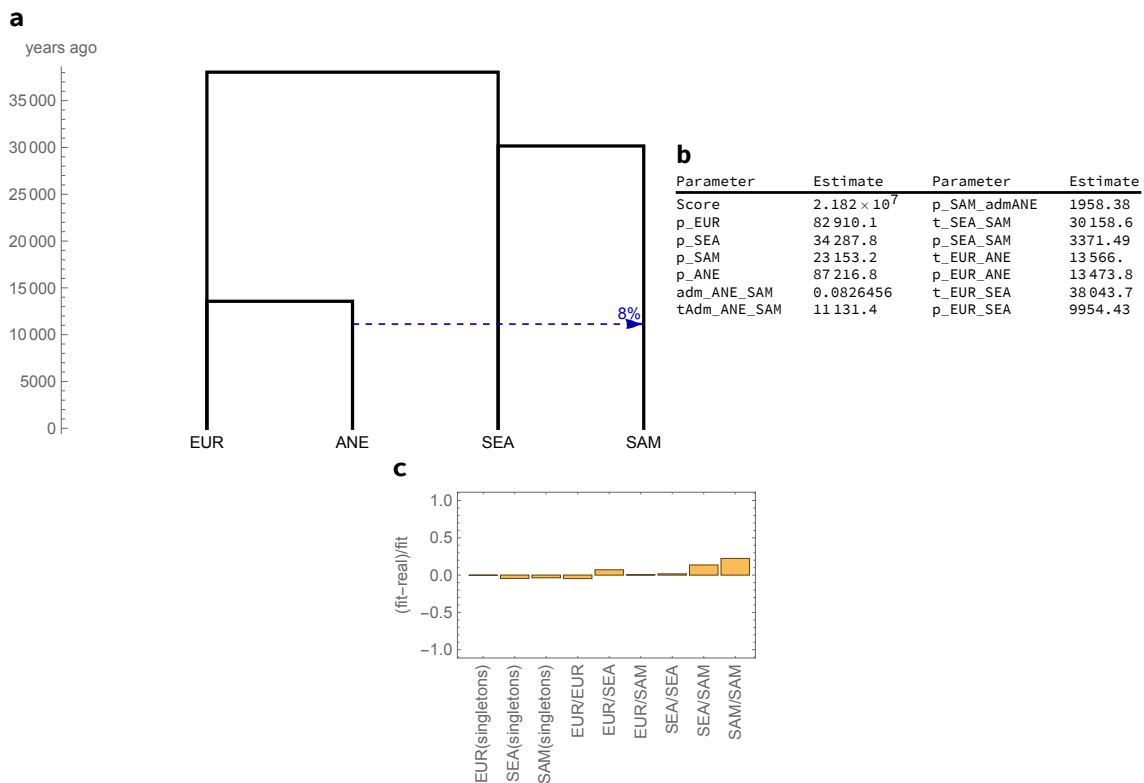

1262

1263 **Fig. S9.2.** Adding Southern First Peoples onto the EUR/SEA tree, with a ghost population ANE.

1264

1265 **Adding Siberians**

1266 We then added Siberians (SIB) to the tree. According to our *qpGraph* models, they can be  
 1267 modeled as a sister clade to Native Americans, with extra European and East Asian  
 1268 contributions. We here omitted the East Asian contribution to check whether a simpler



1269 model with only European contribution also fits. Also, we now split the ANE contribution  
 1270 into two admixture events, one into the ancestral SIB/SAM branch, and one into the SAM  
 1271 branch (Fig. S9.3), as in the *qpGraph* models. The resulting fit shows substantial  
 1272 overestimation of SEA/SAM allele sharing, which is likely due to the lack of the American  
 1273 Pleistocene bottleneck, as well as the lack of additional Asian admixture in SIB, which  
 1274 “drags” the SEA split time close to SIB and SAM, leading to the overestimation. We  
 1275 therefore added SEA admixture in the next model with Chukotko-Kamchatkan speakers  
 1276 below.

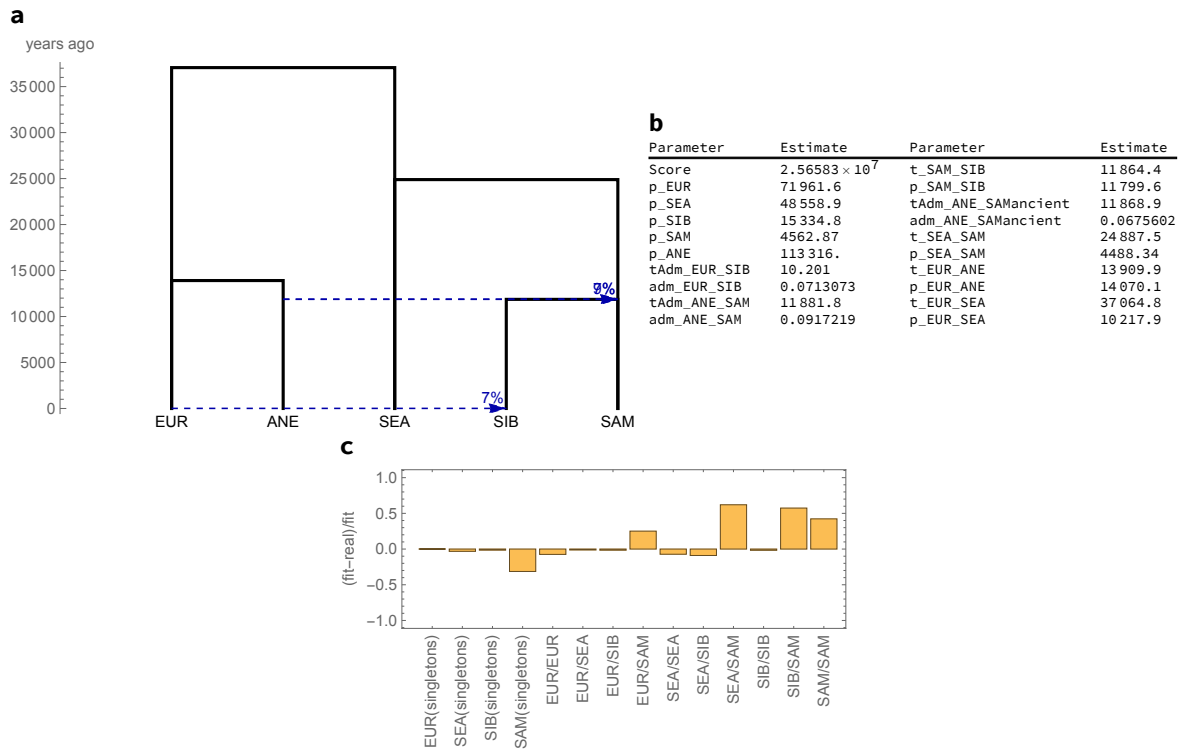

1277  
 1278 **Fig. S9.3.** Adding Siberians onto the EUR/SEA/SAM tree. As indicated in panel c, RASS between SEA and SAM is  
 1279 overestimated by 50% in this model.

1280

### 1281 Adding Kamchatkan populations

1282 In addition to Siberians, we also added populations from the Russian Far East (Koryak and  
 1283 Itelmen) to the tree (Fig. S9.4). In contrast to the previous model, we now fix the time of the  
 1284 ancient ANE contribution into the SIB/SAM ancestral branch, in order to reduce the number  
 1285 of free parameters in the model, and since there is not much power to infer the times of  
 1286 these deep admixture events. We here also added an admixture edge from SEA into SIB,  
 1287 which improves the fit, but which apparently does not help much with the current  
 1288 overestimation of the SAM/SEA sharing.

1289

### 1290 Adding northern North Americans

1291 We next added Northern First Peoples (NAM) to the tree, which should be a sister clade to  
 1292 the SAM, who – in contrast to Athabaskans – should not have any substantial Siberian  
 1293 ancestry according to the *qpGraph* analysis, although they are expected to have European  
 1294 colonial admixture. We therefore added NAM as a sister clade to SAM with additional EUR  
 1295 admixture, arbitrarily fixed at 250 years ago (Fig. S9.5). The resulting tree shows a large

1296 underestimation of the C-K/NAM allele sharing, which must be due to the small levels of  
 1297 First Peoples ancestry found in Chukotko-Kamchatkan speakers. As discussed in the  
 1298 *qpGraph* section (section 10), we believe this ancestry came into Kamchatka through  
 1299 bidirectional admixture with Yup'ik/Inuit branches, so we leave this underestimation for  
 1300 now and first add the Yup'ik/Inuit (ESK) group to the tree.

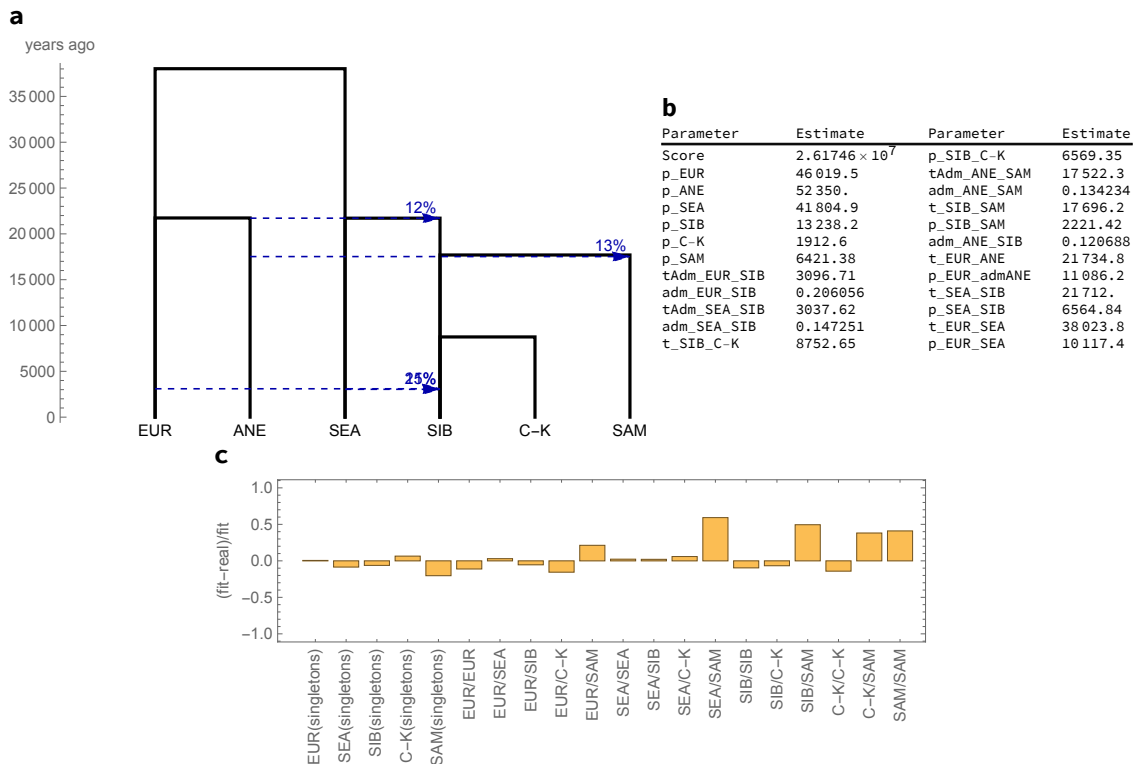

1301  
 1302 **Fig. S9.4.** Adding Chukotko-Kamchatkan speakers (C-K) onto the EUR/SEA/SIB/SAM tree.

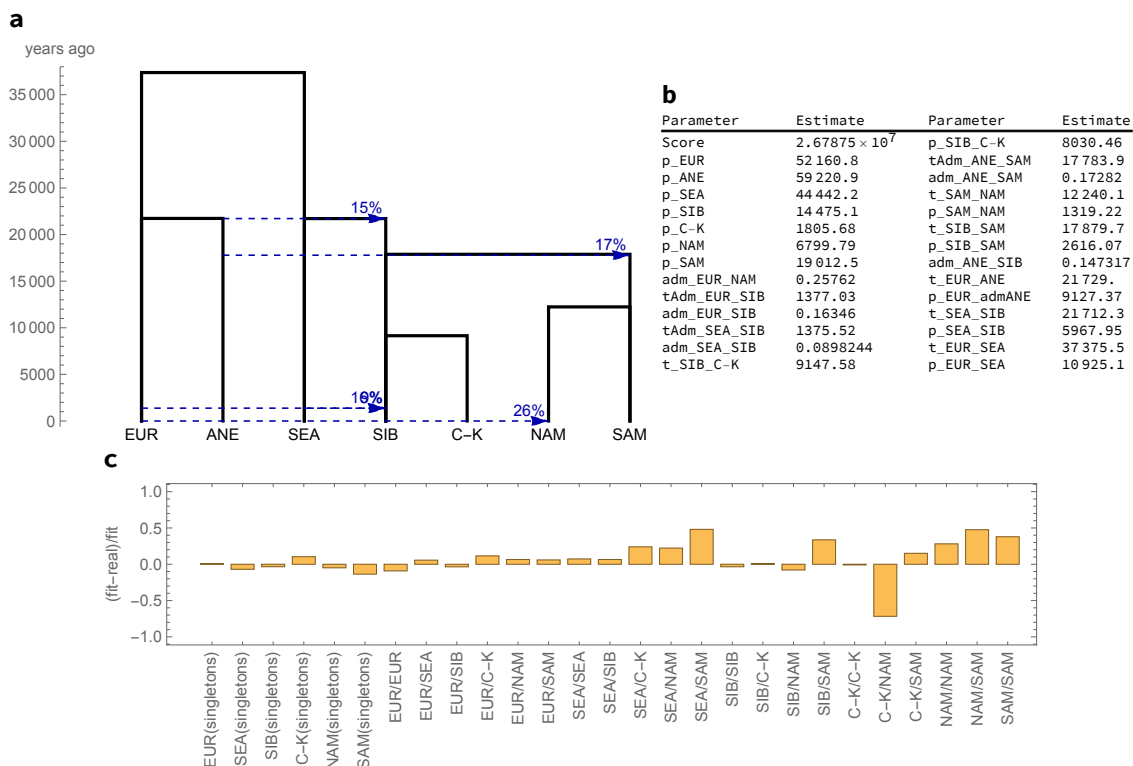

1303  
 1304 **Fig. S9.5.** Adding Northern First Peoples (NAM) onto the EUR/SEA/SIB/C-K/SAM tree.

1305 **Adding Eskimo-Aleut-speaking populations to the tree**

1306 We next added several Eskimo-Aleut-speaking populations onto the tree, grouped into two  
 1307 populations: ALE (Aleuts) and ESK (Yup'ik from Chukotka and Greenlandic Inuit). We added  
 1308 them as a clade, which in turn is cladal with Chukotko-Kamchatkan speakers, with additional  
 1309 Native American ancestry from NAM. We also added the ESK/C-K bidirectional admixture  
 1310 event (Fig. S9.6). This model fits overall well, with one exception: The model largely  
 1311 underestimates NAM/C-K sharing and to a much lesser extent SIB/NAM. This may suggest  
 1312 some Asian gene flow from C-K, ALE or ESK into NAM, potentially through Athabaskans (see  
 1313 below).

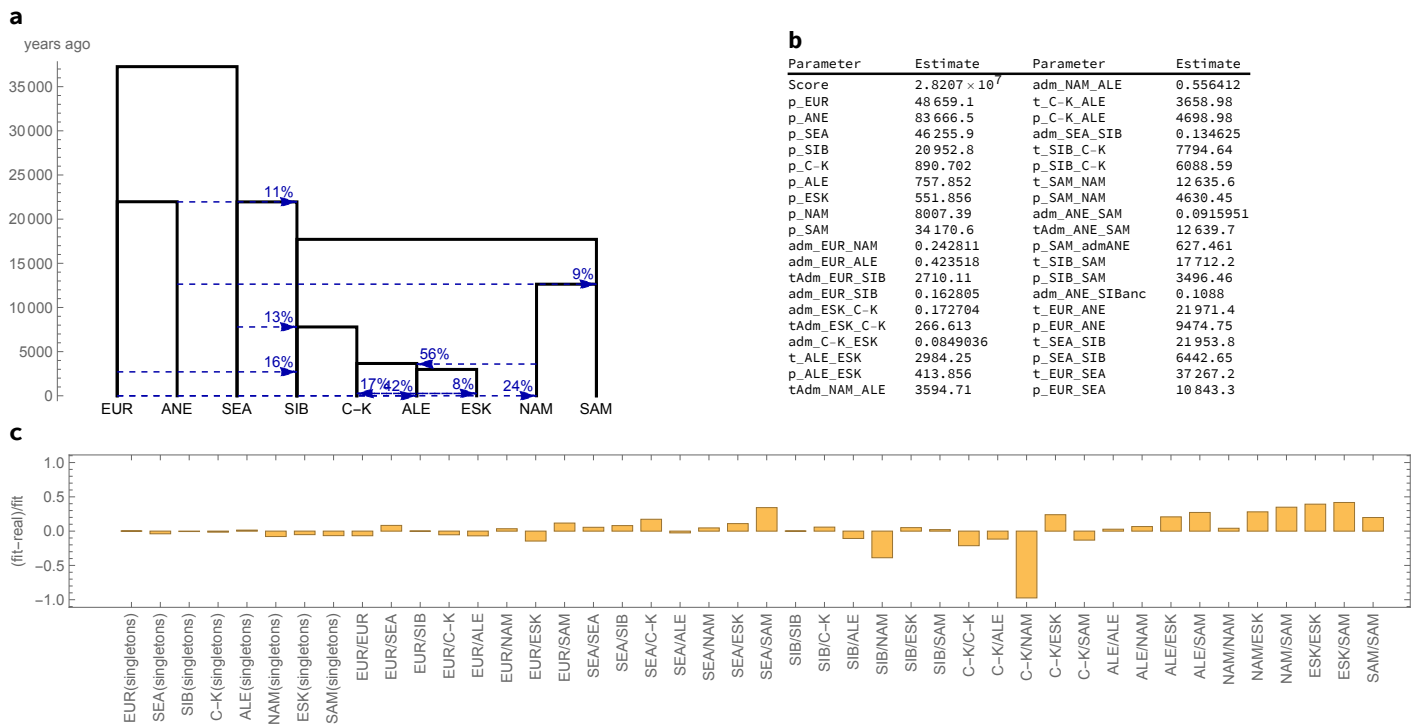

1314 **Fig. S9.6.** Adding Eskimo-Aleut speakers (ALE and ESK) onto the EUR/SEA/SIB/C-K/NAM/SAM tree, as a sister  
 1315 group to C-K with additional Native American ancestry, and a bidirectional gene flow between C-K and ESK.  
 1316

1317

1318 **Adding Athabaskans**

1319 Finally, we added the Athabaskan meta-population to the tree (Dakelh and Chipewyans).  
 1320 We first modeled them as a sister clade to NAM (Fig. S9.7).

1321 The model substantially underestimates the SIB/ATH allele sharing, suggesting some  
 1322 Asian gene flow into Athabaskans, as consistent with other analyses and previous  
 1323 publications (Reich et al. 2012, Raghavan et al. 2014b, 2015, Moreno-Mayar et al. 2018). We  
 1324 tested three different models with Asian gene flow into Athabaskans (distinguished by the  
 1325 topology on the Asian side) that emerged as best-fitting in our *qpGraph* analysis (Fig. S10.3):

1326 Model\_1 (C-K, (ATH, (ESK, ALE))): The source that contributed to Athabaskans split  
 1327 off the common ancestral branch of ESK and ALE after its split from the common ancestral  
 1328 branch with C-K.

1329 Model\_2 (ATH, (C-K, (ESK, ALE))): The source that contributed to Athabaskans split  
 1330 off the common ancestor of C-K, ESK and ALE and is therefore an outgroup to those three  
 1331 populations.

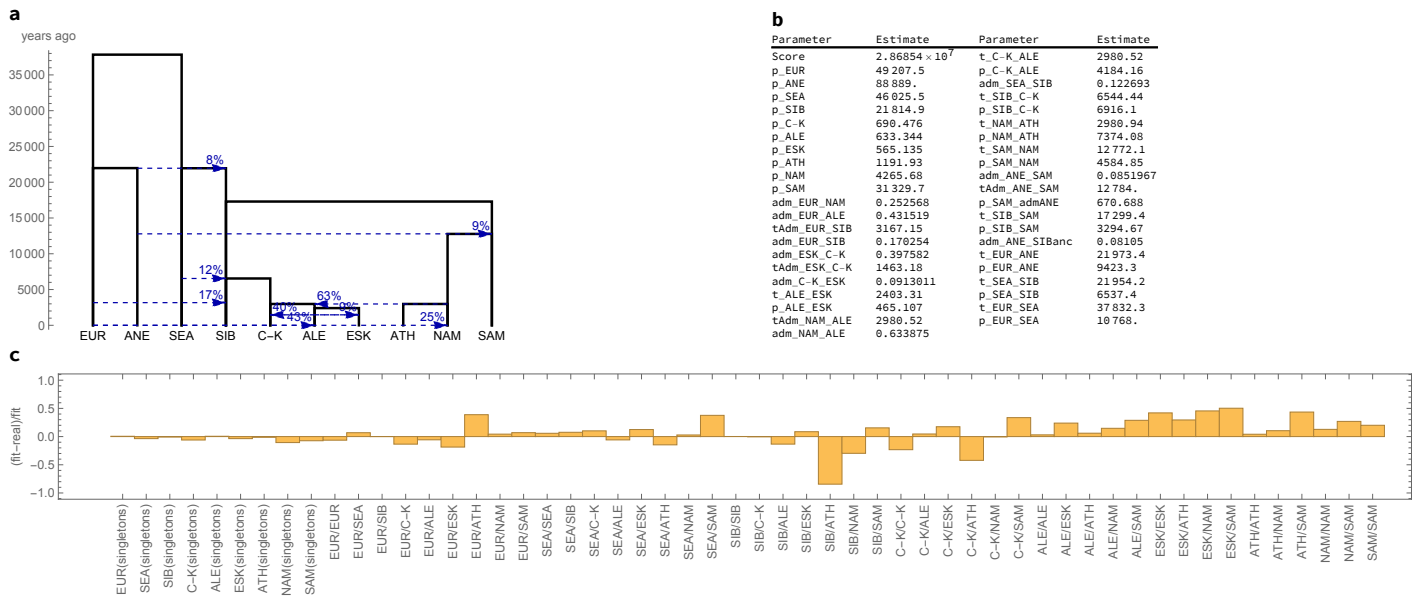

1332

1333 **Fig. S9.7.** Adding Athabaskans onto the EUR/SEA/SIB/C-K/ALE/ESK/NAM/SAM tree, as a sister group to NAM.  
1334 The model underestimates SIB/ATH and C-K/ATH allele sharing.

1335

1336 Model\_3 ((C-K, ATH), (ESK, ALE)): The Athabaskan source split off the branch leading  
1337 to present-day C-K *after* its split from the common ancestor with ESK and ALE. This is the  
1338 model proposed in (Moreno-Mayar et al. 2018).

1339 We first used “rarecoal maxl” to numerically optimize each model, and then used  
1340 “rarecoal mcmc” to refine the estimates, using Markov Chain Monte Carlo to search for a  
1341 local optimum. This is computationally more costly, but ensures that the optimum has been  
1342 reached. The composite likelihood of the three refined competing models are:

1343

| Model                              | Composite log-likelihood | Difference |
|------------------------------------|--------------------------|------------|
| Model_1                            | -28,682,166              | 0          |
| Model_2                            | -28,682,227              | -61        |
| Model_3 (Moreno-Mayar et al. 2018) | -28,682,509              | -343       |

1344

1345 The highest log-likelihood is achieved by Model\_1 (C-K, (ATH, (ESK, ALE))) shown in  
1346 Fig. S9.8. This model is consistent with the topology inferred by *qpGraph* (Fig. S10.5), but it  
1347 underestimates allele sharing between NAM and SIB, suggesting some additional gene flow  
1348 from ATH into NAM (consistent with *qpAdm* and PCA results, see Fig. 1, Extended Data Figs.  
1349 2-4, Tables S5.3, S5.4). To test this, we ran the three models proposed above with an  
1350 additional ATH->NAM gene flow.

1351

| Model             | Composite log-likelihood | Difference |
|-------------------|--------------------------|------------|
| Model_1_ATHadmNAM | -28,680,495              | 0          |
| Model_2_ATHadmNAM | -28,680,861              | -366       |
| Model_3_ATHadmNAM | -28,681,925              | -1,430     |

1352



1371

## 1372 **Correcting the composite likelihood for linkage correlations**

1373 *Rarecoal* uses a composite likelihood approach, which simply computes the total likelihood  
1374 of the data given a model as the product of probabilities across all sites. This approach  
1375 neglects linkage among sites, which does not affect the maximum likelihood parameter  
1376 estimates. However, composite likelihoods cannot be used to compute posterior  
1377 distributions or assess significance of model comparisons.

1378 We can solve this issue by correcting the composite likelihood by a factor that reflects the  
1379 *effective* number of independent sites, which is much smaller than the true number of sites  
1380 analyzed. To estimate the reduction factor of the likelihood, we first use a simple Block-  
1381 Jackknife procedure to estimate the sampling variance of the joint allele frequency  
1382 spectrum (Busing et al. 1999). Jackknife error estimation is built into the program  
1383 “freqSum2histogram” from the rarecoal-tools repository used here  
1384 (<https://github.com/stschiff/rarecoal-tools>), using the flag “-j”. This program generates a  
1385 histogram of mutation patterns across the nine populations, which reports i) the number of  
1386 times a given pattern is observed, ii) the frequency of that pattern, which is the number of  
1387 observations divided by the total number of callable base pairs across the genome (here  
1388 1,068,434,478), and iii) a Jackknife error estimate of that frequency, computed by  
1389 chromosome-wise block Jackknife. Fig. S9.10 summarizes the error estimates as a function  
1390 of the frequency of each pattern (up to total allele count 4).

1391 Under a true independent sites model without genetic linkage, the errors should follow a  
1392 simple Poisson error model (the dashed line in Fig. S9.10), which predicts a square-root  
1393 relationship between the error and the frequency of an observation. Specifically, the  
1394 relationship between errors  $\Delta x$  and frequency  $x$  should be:

1395 
$$\Delta x = \sqrt{\frac{x}{N}}$$

1396 where  $N$  is the number of callable sites.

1397 As can be seen, the true error estimates are much higher than under the  
1398 independent sites assumption, which naturally reflects genetic linkage. We fitted an  
1399 “Effective sites” model to the observed errors (the solid line in Fig. S9.10), by simply  
1400 reducing the total number of callable sites by a factor  $\alpha$ . Specifically, we fit the function

1401 
$$\Delta x = \sqrt{\frac{x}{\alpha N}}$$

1402 inferring the parameter  $\alpha$  by a simple least-square fit. We estimate  $\alpha = 0.055$ , which  
1403 means that the inferred effective number of sites is about 18 times smaller than the true  
1404 number of sites. This effective sites correction is not used in the maximum likelihood  
1405 estimates above, but only in MCMC runs below and in model comparisons where indicated.

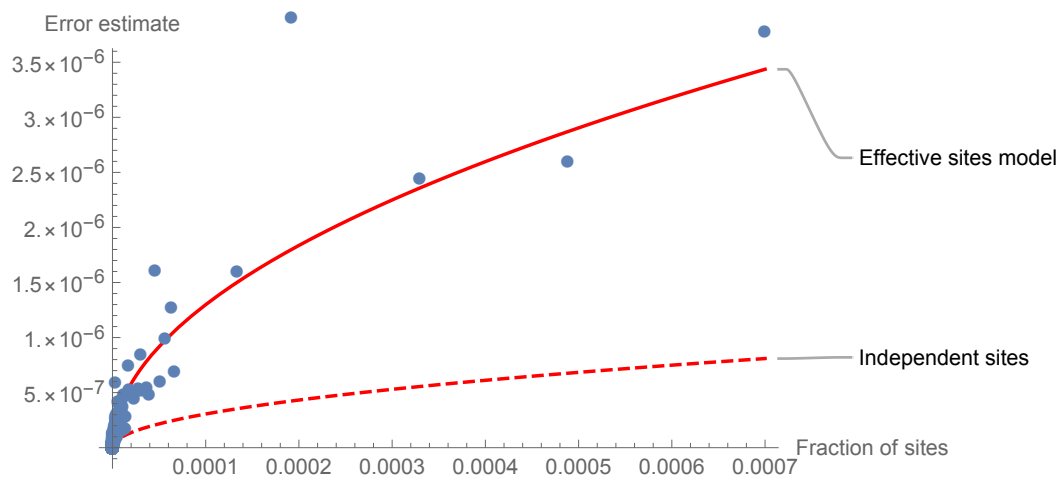

1406

1407

1408

**Fig. S9.10.** Fitting an effective sites error model to the joint site frequency spectrum for 9 populations (EUR, SEA, SIB, C-K, ALE, ESK, ATH, NAM, SAM).

1409

1410

1411

1412

1413

1414

Since the composite log-likelihood is a sum across all sites, a model with reduced effective number of sites simply results in a log-likelihood that is reduced by the same factor. Hence, the log-likelihood differences are also reduced by that same factor. We can therefore correct the likelihood differences for the three competing models discussed above (here without the ATH->NAM gene flow):

1415

| Model                                     | Composite log-likelihood difference | Corrected log-likelihood difference |
|-------------------------------------------|-------------------------------------|-------------------------------------|
| <b>Model_1</b>                            | 0                                   | 0                                   |
| <b>Model_2</b>                            | -61                                 | -3.3                                |
| <b>Model_3</b> (Moreno-Mayar et al. 2018) | -343                                | -18.9                               |

1416

1417

1418

1419

which shows that Model\_2 is  $e^{3.3} = 27.1$  times less likely than Model\_1, and Model\_3 is  $e^{18.9} = 1.6 \times 10^8$  times less likely than Model\_1, which gives significant support for Model\_1, according to the arguments on significance in section 10.2.

1420

1421

1422

1423

We built into the program “rarecoal mcmc” an option implementing such an “effective sites” correction for reducing the total composite likelihood and hence widening the sampled posterior distribution. The resulting parameter estimates with and without that “effective sites” correction are shown in Fig. S9.11.

1424

1425

1426

1427

1428

1429

1430

1431

1432

1433

1434

Overall, the parameter estimates with and without correction overlap as expected, with some exceptions in particular for split times estimates (first panel in Fig. S9.11), where the inference based on the corrected likelihood yields older estimates for the most recent split times among the ALE, ESK and C-K branches, as well as for admixture times within these branches. Specifically, parameter estimates for  $t_{\text{NAM\_ATH}}$ ,  $t_{\text{C-K\_ALE}}$ ,  $t_{\text{ALE\_ESK}}$  as well as admixture times  $t_{\text{Adm\_NAM\_ALE}}$  and  $t_{\text{Adm\_ALE\_ATH}}$  are about 1,000 years older with the corrected likelihood compared to the composite likelihood, while  $t_{\text{SIB\_C-K}}$  is around 1,000 years younger compared to the composite likelihood estimate. We believe two factors might contribute to this discrepancy. First, the maximum likelihood estimate might represent a local optimum, whereas the broader parameter space exploration using the effective sites MCMC finds the global optimum which has older split times in this sub-



1435 tree. Second, these earlier split times might reflect differences in parameter space due to  
 1436 constraints imposed by the model topologies. In particular, the model topology itself  
 1437 imposes ordering constraints on split- and admixture time parameters. The joint posterior  
 1438 distribution therefore could have subtle topological features which might cause the MCMC  
 1439 to explore different regions of the parameter space despite slightly sub-optimal likelihoods  
 1440 but larger probability areas.

1441 Overall, we believe the corrected likelihood Bayesian calculation yields realistic  
 1442 posterior credibility intervals for parameters, and we use the median estimates of those  
 1443 intervals for plotting our final model in Fig. 2. We summarize the maximum likelihood  
 1444 estimates, as well as the corrected likelihood marginal posterior percentiles in Table S9.2.  
 1445 The final model was calibrated using a mutation rate of  $1.25 \times 10^{-8}$  per basepair per  
 1446 generation, and a generation time of 29 years. The resulting model appears to be overall  
 1447 consistent with archaeology, with two small noteworthy issues. First, the ancient Anzick  
 1448 genome (12,600 calBP) (Rasmussen et al. 2014) has a substantially higher affinity to the

1449 SAM than to the NAM branch.  
 1450 To allow for this, the NAM/SAM  
 1451 split time needs to be sufficiently  
 1452 older than Anzick's age, which in  
 1453 our estimate is barely the case.  
 1454 We believe this can in principle  
 1455 be fixed by using the Anzick  
 1456 genome as a calibration point. A  
 1457 related issue poses our estimate  
 1458 of the ANE->SAM admixture  
 1459 edge, which is estimated to be  
 1460 too recent to allow for the older  
 1461 NAM/SAM split necessary to fit  
 1462 Anzick. We believe these  
 1463 discrepancies are tolerable, but  
 1464 acknowledge room for  
 1465 improvement by using directly  
 1466 dated ancient samples to further  
 1467 constrain the model fits, which  
 1468 however will also further  
 1469 increase the already substantial  
 1470 model complexity.

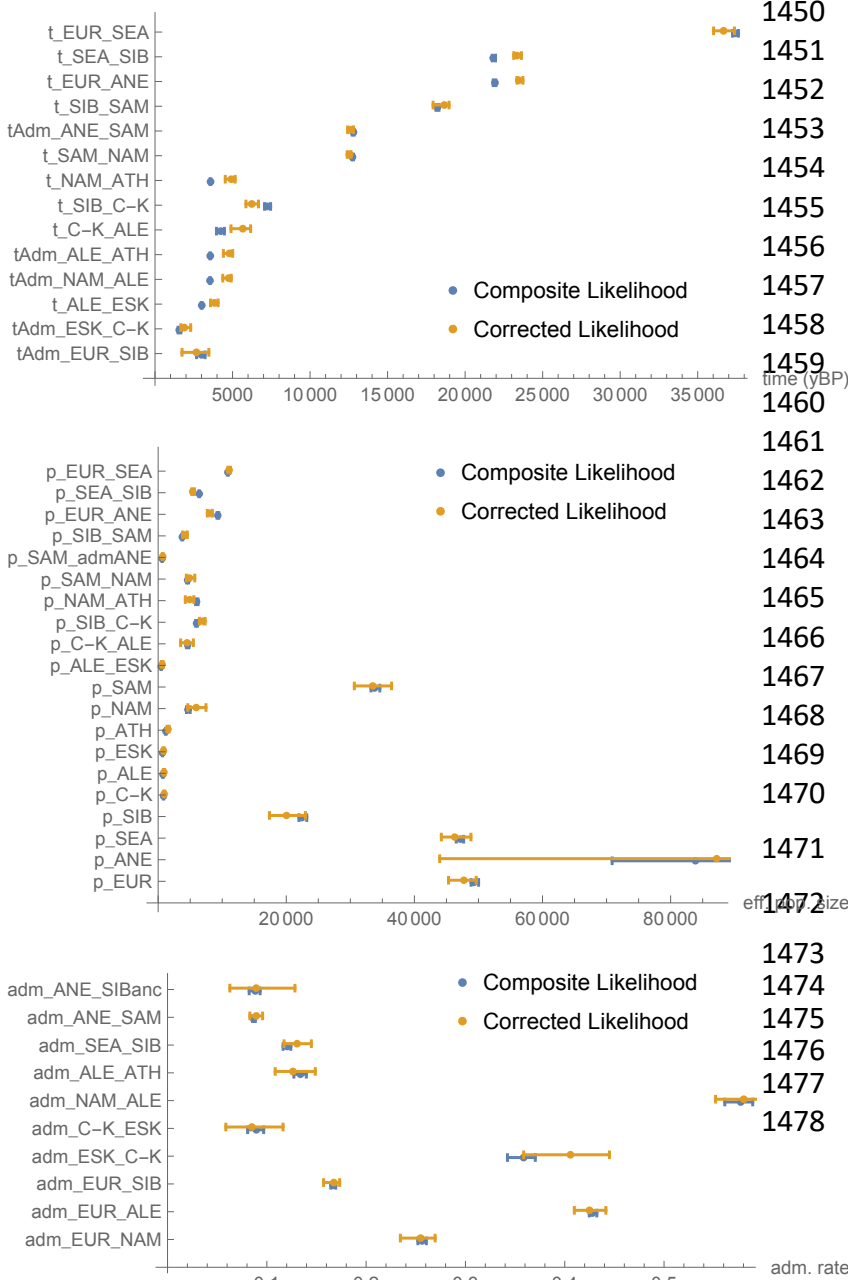

1471  
 1472  
 1473 **Fig. S9.11.** Posterior credibility  
 1474 estimation for all parameters of the  
 1475 final model shown in Fig. S9.8 with  
 1476 and without the “effective sites”  
 1477 correction of the likelihood.  
 1478



|                      | Parameter    | Maximum composite likelihood estimate | 2.5% posterior percentile, corrected likelihood | 50% posterior percentile, corrected likelihood | 97.5% posterior percentile, corrected likelihood |
|----------------------|--------------|---------------------------------------|-------------------------------------------------|------------------------------------------------|--------------------------------------------------|
| Split Times (ya)     | t_ALE_ESK    | 3,032                                 | 3,580                                           | 3,835                                          | 4,066                                            |
|                      | t_C-K_ALE    | 4,144                                 | 4,901                                           | 5,662                                          | 6,165                                            |
|                      | t_SIB_C-K    | 7,161                                 | 5,865                                           | 6,241                                          | 6,674                                            |
|                      | t_NAM_ATH    | 3,568                                 | 4,533                                           | 4,924                                          | 5,168                                            |
|                      | t_SAM_NAM    | 12,714                                | 12,396                                          | 12,549                                         | 12,639                                           |
|                      | t_SIB_SAM    | 18,171                                | 17,935                                          | 18,654                                         | 18,962                                           |
|                      | t_EUR_ANE    | 21,949                                | 23,346                                          | 23,463                                         | 23,727                                           |
|                      | t_SEA_SIB    | 21,760                                | 23,136                                          | 23,349                                         | 23,633                                           |
|                      | t_EUR_SEA    | 37,323                                | 36,024                                          | 36,668                                         | 37,370                                           |
| Admixture Times (ya) | tAdm_EUR_SIB | 3,045                                 | 1,742                                           | 2,671                                          | 3,470                                            |
|                      | tAdm_ESK_C-K | 1,622                                 | 1,668                                           | 1,886                                          | 2,299                                            |
|                      | tAdm_NAM_ALE | 3,550                                 | 4,371                                           | 4,752                                          | 4,914                                            |
|                      | tAdm_ALE_ATH | 3,558                                 | 4,410                                           | 4,799                                          | 5,005                                            |
|                      | tAdm_ANE_SAM | 12,799                                | 12,423                                          | 12,618                                         | 12,800                                           |
| Admixture Rates (%)  | adm_EUR_NAM  | 26%                                   | 23%                                             | 25%                                            | 27%                                              |
|                      | adm_EUR_ALE  | 43%                                   | 41%                                             | 42%                                            | 44%                                              |
|                      | adm_EUR_SIB  | 17%                                   | 16%                                             | 17%                                            | 17%                                              |
|                      | adm_ESK_C-K  | 37%                                   | 36%                                             | 41%                                            | 45%                                              |
|                      | adm_C-K_ESK  | 9%                                    | 6%                                              | 8%                                             | 12%                                              |
|                      | adm_NAM_ALE  | 58%                                   | 55%                                             | 58%                                            | 62%                                              |
|                      | adm_ALE_ATH  | 13%                                   | 11%                                             | 13%                                            | 15%                                              |
|                      | adm_SEA_SIB  | 12%                                   | 12%                                             | 13%                                            | 14%                                              |
|                      | adm_ANE_SAM  | 9%                                    | 8%                                              | 9%                                             | 10%                                              |
| adm_ANE_SIBanc       | 9%           | 6%                                    | 9%                                              | 13%                                            |                                                  |
| Population Sizes     | p_EUR        | 49,046                                | 45,330                                          | 47,722                                         | 49,648                                           |
|                      | p_ANE        | 84,473                                | 43,952                                          | 87,184                                         | 179,202                                          |
|                      | p_SEA        | 47,526                                | 44,208                                          | 46,288                                         | 48,824                                           |
|                      | p_SIB        | 22,542                                | 17,375                                          | 20,031                                         | 22,986                                           |
|                      | p_C-K        | 818                                   | 863                                             | 936                                            | 1,042                                            |
|                      | p_ALE        | 752                                   | 818                                             | 918                                            | 1,014                                            |
|                      | p_ESK        | 670                                   | 759                                             | 841                                            | 937                                              |
|                      | p_ATH        | 1,196                                 | 1,409                                           | 1,538                                          | 1,716                                            |
|                      | p_NAM        | 4,547                                 | 4,631                                           | 5,944                                          | 7,464                                            |
|                      | p_SAM        | 33,988                                | 30,625                                          | 33,516                                         | 36,439                                           |
|                      | p_ALE_ESK    | 474                                   | 499                                             | 613                                            | 770                                              |
|                      | p_C-K_ALE    | 4,581                                 | 3,510                                           | 4,512                                          | 5,501                                            |
|                      | p_SIB_C-K    | 6,046                                 | 6,441                                           | 6,975                                          | 7,326                                            |
|                      | p_NAM_ATH    | 6,008                                 | 4,242                                           | 4,906                                          | 5,564                                            |
|                      | p_SAM_NAM    | 4,590                                 | 4,403                                           | 4,899                                          | 5,715                                            |
|                      | p_SAM_admANE | 626                                   | 654                                             | 720                                            | 776                                              |
|                      | p_SIB_SAM    | 3,751                                 | 3,830                                           | 4,118                                          | 4,546                                            |
|                      | p_EUR_ANE    | 9,358                                 | 7,678                                           | 8,058                                          | 8,465                                            |
|                      | p_SEA_SIB    | 6,436                                 | 5,254                                           | 5,380                                          | 5,664                                            |
|                      | p_EUR_SEA    | 10,861                                | 10,896                                          | 11,093                                         | 11,297                                           |

1479 **Table S9.2.** Parameter estimates for the final model using default scaling with a mutation rate of  $1.25 \times 10^{-8}$   
1480 per generation per basepair, and a generation time of 29 years. Maximum likelihood estimates are based on  
1481 the composite likelihood, while posterior distributions are computed for a corrected likelihood as described  
1482 above.  
1483

1484 **Adding ancient genomes**

1485 Onto the final tree estimated from present-day sequences only, we added the genomes of  
1486 three ancient individuals with whole-genome shotgun data: The ancient Saqqaq genome  
1487 published in Rasmussen et al. 2010, an ancient Aleut individual, and an ancient Athabaskan  
1488 individual, both sequenced within this study. For all three samples, we made a Majority call  
1489 with a minimum coverage of 3 at all variable sites in our “SGDP/Raghavan et al.” dataset  
1490 (see details in section 8). Given previous results from *qpGraph* (see section 10), we tested a  
1491 limited number of branching positions for these ancient individuals.

1492 For the ancient Aleut, we tested a branching position onto the modern Aleut branch  
1493 at 600 ya (the median C14 date for that sample) and before colonial admixture at 250 ya.  
1494 For the ancient Athabaskan, we tested a branching position onto the modern Athabaskan  
1495 branch at 780 ya (its median C14 date). In both cases we did not attempt to estimate a more  
1496 precise split time between the ancient sample and its corresponding modern branch given  
1497 the limited information available from a single ancient sample, in particular with pseudo-  
1498 haploid genotyping calls, which provide no information on private drift within the ancient  
1499 branch.

1500 To evaluate those branching positions, we compared rare allele sharing statistics  
1501 between the ancient individual and each of our modern populations with those estimated  
1502 from a model with the ancient genome added to the final model (Fig. S9.12). Note that the  
1503 Paleo-Eskimo admixture proportion in Athabaskans, as well as the Native American / PPE  
1504 mixture proportions for Aleuts are taken from the final model estimates obtained without  
1505 any ancient genomes (Table S9.2).

1506

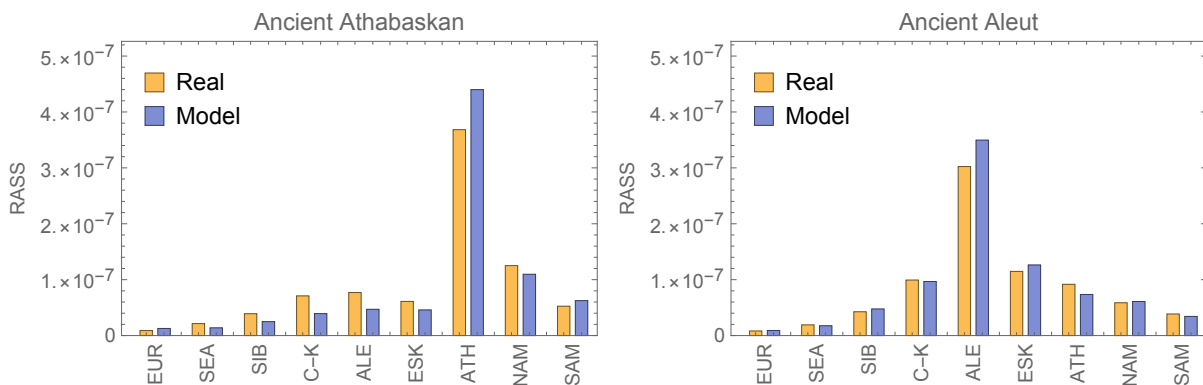

1507

1508 **Fig. S9.12.** Mapping the ancient Athabaskan and ancient Aleut samples onto the tree.

1509

1510 In both cases, the model and real data agree very well. By far the highest allele  
1511 sharing between ancient and modern populations is seen with the modern Athabaskan and  
1512 the modern Aleut branch, respectively, strongly suggesting that these ancient samples are  
1513 direct ancestors of the respective modern populations. However, in the case of the ancient  
1514 Athabaskan, the allele sharing with C-K and ALE is higher than predicted under our model,  
1515 suggesting that the ancient Athabaskan has even higher proportions of Paleo-Eskimo  
1516 ancestry than does modern Athabaskans, which may be due to population structure within  
1517 the Athabaskan population, or a dilution through subsequent admixture of non-Athabaskan  
1518 First Peoples into the present-day Athabaskan population. This result is supported by our  
1519 extensive admixture modeling using the *qpAdm* approach and by PCA (Fig. 1, Extended Data

1520 Figs. 2-4).

1521 In the case of the 3,900-year-old ancient Saqqaq genome (Rasmussen et al. 2010),  
 1522 we tested four different locations on the tree to merge its branch with the best-fitting  
 1523 modern phylogeny (Fig. S9.8). The first position, called ALE\_beforeATHadm, is a position on  
 1524 the ancestral branch leading to present-day Eskimo-Aleuts, but *before* admixture from that  
 1525 branch into Athabaskans. The next position, called ALE\_afterATHadm, is also on the  
 1526 ancestral branch leading to Eskimo-Aleuts, but *after* admixture from that branch into  
 1527 Athabaskans. The third position, called C-K\_beforeALEsplit, is a position on the ancestral  
 1528 branch leading to ALE, ESK and C-K. The final position, called C-K\_afterALEsplit, is a position  
 1529 on the branch leading to present-day C-K, after its split from the Eskimo-Aleut branch. The  
 1530 four positions correspond to four different topologies within the PPE clade, as indicated in  
 1531 Table S9.3:

1532

| Saqqaq branch point | PPE clade topology       | Split time | Log-likelihood | Log-likelihood difference | Corrected log-likelihood difference |
|---------------------|--------------------------|------------|----------------|---------------------------|-------------------------------------|
| ALE_beforeATHadm    | (C-K, (P-E, (ATH, E-A))) | 5,104 ya   | -93,800        | -277                      | -15                                 |
| ALE_afterATHadm     | (C-K, (ATH, (P-E, E-A))) | 4,756 ya   | -93,523        | 0                         | 0                                   |
| C-K_beforeALEsplit  | (P-E, (C-K, (ATH, E-A))) | 5,800 ya   | -94,559        | -1,036                    | -57                                 |
| C-K_afterALEsplit   | ((C-K, P-E), (ATH, E-A)) | 5,220 ya   | -94,375        | -852                      | -47                                 |

1533 **Table S9.3.** Tested models for Saqqaq to branch onto the final maximum likelihood tree of 9 populations.

1534

1535 The winning position is the position on the branch leading to Eskimo-Aleuts, but  
 1536 after the admixture into Athabaskans, corresponding to the topology (C-K, (ATH, (P-E, E-A))),  
 1537 which is also the most likely topology obtained using the *qpGraph* method (section 10). All  
 1538 model comparisons are significant, since the corrected log-likelihood differences are above  
 1539 3 (see arguments from section 10.2).

1540 The comparison of RASS between the model and data for the winning topology is  
 1541 shown in Fig. S9.13. The model captures the salient feature of the RASS statistics, which is  
 1542 the high level of rare allele sharing between C-K and the ancient Saqqaq individual.  
 1543 However, the model also underestimates RASS between Saqqaq and each population in the  
 1544 PPE clade, i.e. Eskimo-Aleuts and Chukotko-Kamchatkans, which is difficult to explain, but  
 1545 could be due to additional gene flow between Saqqaq descendants and ancestors of extant  
 1546 populations that we currently do not model.

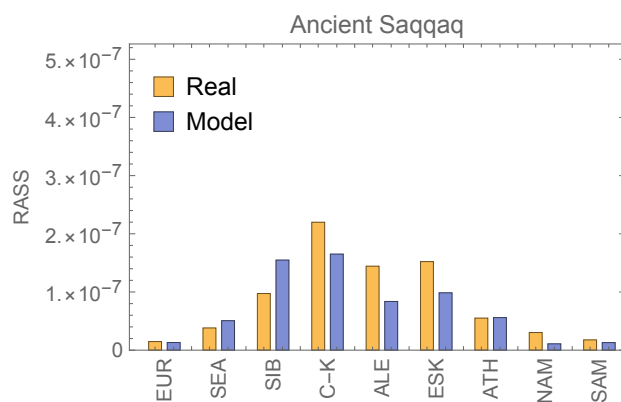

1547

1548 **Fig. S9.13.** Mapping the ancient Saqqaq individual onto the 9 population tree.

1549

1550 *References (for this section)*

- 1551 Busing, F. M. T. A., Meijer, E. & Van Der Leeden, R. Delete-M Jackknife for Unequal M. *Statistics and*  
1552 *Computing* **9**, 3–8 (1999).
- 1553 Fenner, J. N. Cross-cultural estimation of the human generation interval for use in genetics-based population  
1554 divergence studies. *Am. J. Phys. Anthropol.* **128**, 415–423 (2005).
- 1555 Haak, W. *et al.* Massive migration from the steppe was a source for Indo-European languages in Europe.  
1556 *Nature* **522**, 207–211 (2015).
- 1557 Mallick, S. *et al.* The Simons Genome Diversity Project: 300 genomes from 142 diverse populations. *Nature*  
1558 **538**, 201–206 (2016).
- 1559 Moreno-Mayar, J. V. *et al.* Terminal Pleistocene Alaskan genome reveals first founding population of Native  
1560 Americans. *Nature* **553**, 203–207 (2018).
- 1561 Patterson, N. *et al.* Ancient admixture in human history. *Genetics* **192**, 1065–1093 (2012).
- 1562 Raghavan, M. *et al.* Upper Palaeolithic Siberian genome reveals dual ancestry of Native Americans. *Nature* **505**,  
1563 87–91 (2014a).
- 1564 Raghavan, M. *et al.* The genetic prehistory of the New World Arctic. *Science* **345**, 1255832 (2014b).
- 1565 Raghavan, M. *et al.* Genomic evidence for the Pleistocene and recent population history of Native Americans.  
1566 *Science* **349**, 1–20 (2015).
- 1567 Rasmussen, M. *et al.* Ancient human genome sequence of an extinct Palaeo-Eskimo. *Nature* **463**, 757–762  
1568 (2010).
- 1569 Rasmussen, M. *et al.* The genome of a Late Pleistocene human from a Clovis burial site in western Montana.  
1570 *Nature* **506**, 225–229 (2014).
- 1571 Reich, D. *et al.* Reconstructing Native American population history. *Nature* **488**, 370–374 (2012).
- 1572 Scally, A. & Durbin, R. Revising the human mutation rate: implications for understanding human evolution.  
1573 *Nat. Rev. Genet.* **13**, 745–753 (2012).
- 1574 Schiffels, S. *et al.* Iron Age and Anglo-Saxon genomes from East England reveal British migration history. *Nat.*  
1575 *Commun.* **7**, 10408 (2016).
- 1576

## 1577 **Supplementary Information section 10**

### 1578 **Admixture graph modeling using *qpGraph***

1579

#### 1580 **10.1 Generating a basic model for present-day populations**

1581 dataset: *transitions and transversions*;

1582 populations: *selected present-day populations*.

1583 To investigate the phylogenetic relationship between relevant populations for this study, we  
1584 tested models which fit observed  $f_4$ -statistics using autosomal markers present in the 1240K  
1585 capture panel<sup>1</sup>. The  $f_4$ -statistic measures correlations between allele frequency differences  
1586 of two pairs of groups<sup>2</sup>. Given a graph topology with population splits, genetic drift and  
1587 admixture edges, the algorithm implemented in the *qpGraph* program infers branch lengths  
1588 and mixture proportions that minimize the difference between the observed and expected  
1589  $f_4$ -statistics.

1590 For the analysis, we used whole genome sequence data from the Simons Genome  
1591 Diversity Project<sup>3</sup> and added additional 35 genomes published by Raghavan et al.<sup>4</sup>.  
1592 Genotype calls for the autosomal part of the 1240K panel were extracted, and SNPs with  
1593 >10% missing rate were removed, leaving 1,062,979 SNPs for the analysis (Supplementary  
1594 Table 5). *qpGraph* analyses were performed in the “useallsnps: NO” mode. We first  
1595 performed a comprehensive search for tree topologies fitting the data. For this, we selected  
1596 the following populations: Mbuti, French, Ami, Mixe, Even, Yup'ik Naukan, Koryak, and  
1597 Chipewyan to represent each of the 7 relevant meta-populations (AFR, EUR, SEA, SAM, SIB,  
1598 E-A, C-K, and ATH, see Table S10.1). To perform an extensive search for possible population  
1599 relationships, we began with a simple tree of three populations (Mbuti, (French, Ami)) and  
1600 iteratively added one population to the tree in the following order: Mixe, Even, Koryak,  
1601 Chipewyan, Yup'ik Naukan. More specifically, the added population was modeled either as a  
1602 sister branch of an existing one or as a mixture of two branches. We tested all branches and  
1603 branch pairs and kept all fitting models (having absolute Z-scores of the worst-fitting  $f_4$ -  
1604 statistic < 3) at each step. A total of 2,932 models were tested this way, and at the end of  
1605 our search, we found 108 graphs that fit all observed  $f_4$ -statistics within three standard error  
1606 intervals ( $|Z\text{-score}| < 3$ ) and 14 graphs that fit all observed  $f_4$ -statistics within two standard  
1607 error intervals ( $|Z\text{-score}| < 2$ ). Six best-fitting graphs are shown in Fig. S10.1.

1608 The fitting graphs share several key features. The most important feature is that  
1609 Mixe, Even, Koryak, Chipewyan and Yup'ik Naukan are all modeled as a mixture of western  
1610 and eastern Eurasian branches, and none of them forms a sister branch with each other: i.e.  
1611 at least one additional gene flow is required to add each population to the graph (Fig.  
1612 S10.1). For example, Koryak cannot be a sister group to Even because of its excessive affinity  
1613 to Mixe. Also, Chipewyan cannot be modeled as a sister group of Mixe and requires a gene  
1614 flow from a Siberian source, e.g. either Koryak- or Even-related branch. Finally, Yup'ik  
1615 Naukan is well modeled as a mixture of Koryak- and Chipewyan-related branches, or as a  
1616 mixture of Koryak- and Mixe-related ones (Fig. S10.1). All possible topologies within the  
1617 proto-Paleo-Eskimo (PPE) clade appear among the best-fitting models shown in Fig. S10.1:  
1618 (PPE<sub>ATH</sub>, (PPE<sub>C-K</sub>, PPE<sub>E-A</sub>)) (Fig. S10.1a,b); (PPE<sub>C-K</sub>, (PPE<sub>ATH</sub>, PPE<sub>E-A</sub>)) (Fig. S10.1c,f); (PPE<sub>E-A</sub>,  
1619 (PPE<sub>ATH</sub>, PPE<sub>C-K</sub>)) (Fig. S10.1d,e). The abbreviations PPE<sub>ATH</sub>, PPE<sub>C-K</sub>, and PPE<sub>E-A</sub> denote the  
1620 sources of proto-Paleo-Eskimo-related ancestry in Chukotko-Kamchatkan (C-K), Athabaskan  
1621 (ATH), and Eskimo-Aleut speakers (E-A), respectively. However, the latter two graphs (Fig.

1622 S10.1d,e) contain 0-length branches within the PPE clade, i.e. there is a trifurcation.  
 1623 Notably, to account for excessive affinity between Koryak and Mixe, the former population  
 1624 is in all cases modelled as having admixture from a source related to Native Americans, but  
 1625 prior to the West Eurasian gene flow into them. For convenience, we term this source  
 1626 “proto-American”. We also tested whether the models generated here fit the data for  
 1627 composite meta-populations (Table S10.1) used for *Rarecoal* modeling (section 9). All  
 1628 topologies shown in Fig. S10.1 fit the data ( $|Z\text{-scores}| < 3$ ) for the AFR, EUR, SEA, SAM, C-K,  
 1629 E-A, and ATH meta-populations.  
 1630

| Abb.            | Full Name                                                            | Populations                                                                                                                                                  | Nr. of samples |
|-----------------|----------------------------------------------------------------------|--------------------------------------------------------------------------------------------------------------------------------------------------------------|----------------|
| <b>AFR</b>      | Africans                                                             | Bantu Herero, Bantu Kenya, Bantu Tswana, Biaka, Dinka, Esan, Gambian, Jul'hoan North, Khomani San, Luhya, Luo, Mandenka, Masai, Mbuti, Mende, Somali, Yoruba | 45             |
| <b>EUR</b>      | Europeans                                                            | Basque, Bergamo, Bulgarian, Crete, Czech, English, Estonian, French, Greek, Hungarian, Orcadian, Polish, Sardinian, Spanish, Tuscan                          | 32             |
| <b>ANE</b>      | Paleolithic Siberian hunter-gatherers                                | Mal'ta (MA1) (Raghavan et al. 2014)                                                                                                                          | 1              |
| <b>WHG</b>      | West European hunter-gatherers                                       | Loschbour (Lazaridis et al. 2014)                                                                                                                            | 1              |
| <b>SEA</b>      | Southeast Asians                                                     | Ami, Atayal, Dai, Kinh, Lahu, Miao, She                                                                                                                      | 15             |
| <b>SIB</b>      | Core Siberians                                                       | Altaiian, Buryat, Ket, Nivkh, Even, Mansi, Tubalar, Ulchi, Yakut                                                                                             | 22             |
| <b>C-K</b>      | Chukotko-Kamchatkan speakers                                         | Itelmen, Koryak                                                                                                                                              | 3              |
| <b>E-A</b>      | Eskimo-Aleut speakers                                                | East and West Greenlandic Inuit, Yup'ik                                                                                                                      | 7              |
| <b>E-A anc.</b> | ancient Aleuts and Neo-Eskimos                                       | Aleuts (this study)                                                                                                                                          | 6              |
|                 |                                                                      | Ekven (this study)                                                                                                                                           | 16             |
|                 |                                                                      | Uelen (this study)                                                                                                                                           | 3              |
| <b>ATH</b>      | Northern Athabaskan speakers                                         | Dakelh, Chipewyan                                                                                                                                            | 4              |
| <b>ATH anc.</b> | ancient Athabaskans                                                  | Tochak McGrath (this study)                                                                                                                                  | 2              |
| <b>USR</b>      | ancient Beringian                                                    | Upward Sun River 1 (USR1) (Moreno-Mayar et al. 2018)                                                                                                         | 1              |
| <b>NAM</b>      | Northern First Peoples (in some figures, “northern First Americans”) | Cree, Tsimshian                                                                                                                                              | 3              |
| <b>SAM</b>      | Southern First Peoples (in some figures, “southern First Americans”) | Aymara, Mixe, Mixtec, Piapoco, Quechua, Yukpa, Zapotec                                                                                                       | 13             |

1631 **Table S10.1.** A table listing all present-day and ancient (grey shading) individuals and groups used in the *qpGraph*  
 1632 analysis. The present-day data is from the two sources: Raghavan *et al.*<sup>4</sup> and the Simons Genome Diversity Project  
 1633 data set<sup>3</sup> as indicated in Supplementary Table 4. The sources of ancient data are indicated in the table.

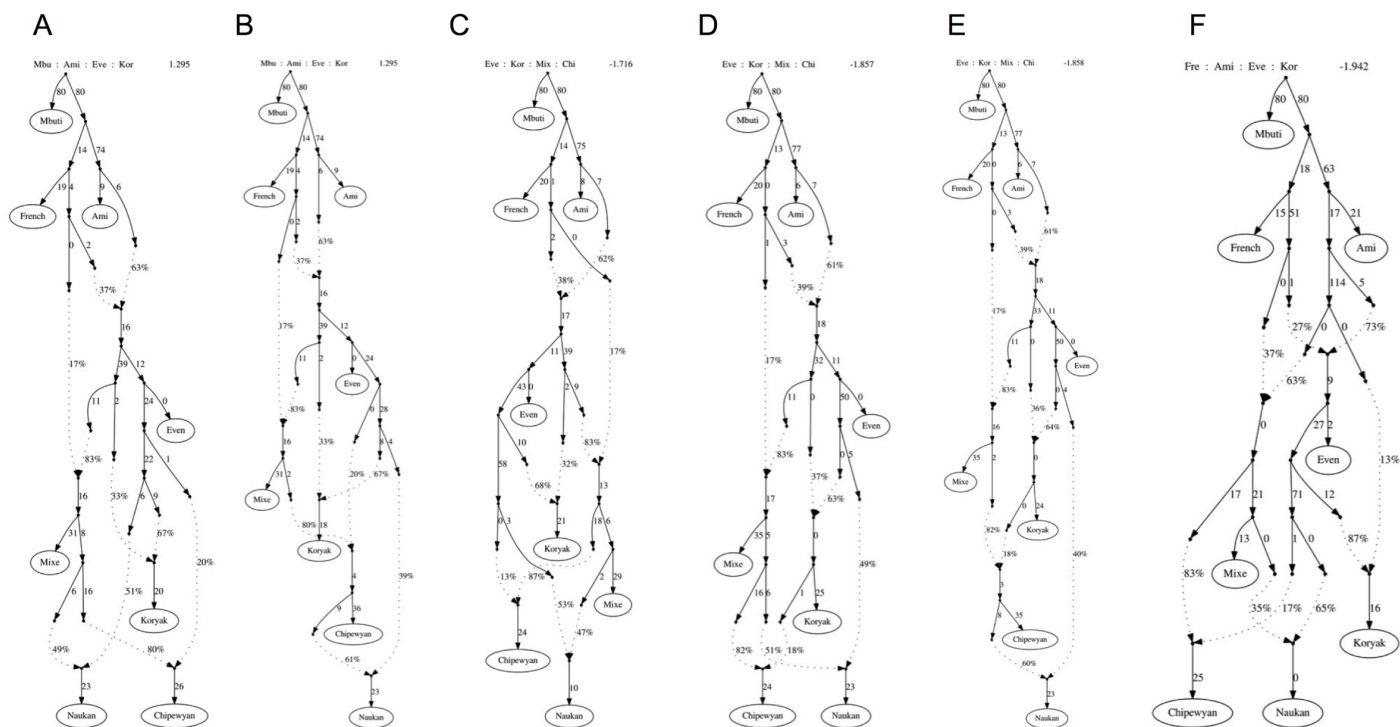

1635 **Fig. S10.1.** Best-fitting models from an extensive search of population graphs. In most cases, Mixe receives two  
 1636 gene flows from a French-related branch (interpreted as ancient North Eurasians, ANE). Yup'ik Naukan is  
 1637 modeled as a mixture of proto-Paleo-Eskimos (PPE) and a Chipewyan-related branch, either before (a, c, d, f)  
 1638 or after (b, e) the PPE gene flow into Chipewyan. Chipewyan is modeled as a mixture of a Native American  
 1639 lineage and either PPE (a-c, f) or a Koryak-related lineage (d, e).

1640

1641 **10.2 Testing all possible topologies within the proto-Paleo-Eskimo clade**

1642 dataset: *transversions only*;

1643 populations: *present-day meta-populations; pseudo-haploid Saqqaq, ancient Aleuts, ancient*  
 1644 *Neo-Eskimos or present-day Yup'ik or Inuit, present-day or ancient Athabaskans.*

1645 We added ancient populations (the Saqqaq Paleo-Eskimo, Aleutian Islanders, Old Bering Sea  
 1646 population from the Ekven and Uelen burial grounds) onto the backbone meta-population  
 1647 graph created in the previous section. To mitigate ancient DNA biases, all transition  
 1648 polymorphisms were removed from the dataset, with 208,649 sites remaining. We found  
 1649 that ancient Aleuts can be modelled as a roughly one to one mixture of First Peoples and a  
 1650 Saqqaq-related lineage, but the Ekven, Uelen and present-day Yup'ik populations require an  
 1651 additional pulse of admixture from a lineage related to C-K. This reflects the fact that all  
 1652 these groups were/are located in Chukotka, where they could interact with local C-K groups.  
 1653 We then constructed a series of more complex models including both ancient Aleuts and  
 1654 present-day Yup'ik or the ancient Ekven/Uelen populations (E-A). Using this set of  
 1655 populations, we tested all possible topologies within the PPE clade. We varied the following  
 1656 parameters: the branching order of real/hypothetical populations (18 topologies, including  
 1657 models with E-A admixture in ATH) and the lineages receiving the "proto-American" and  
 1658 Native American gene flows. In total, 56 models were tested for each ancient/modern E-A  
 1659 population (see model statistics in Table S10.2). Only the following 8 topologies of the PPE  
 1660 clade fit the data: 1/ ((ATH, \*C-K), (E-A, P-E)); 2/ (\*(ATH, C-K), (E-A, P-E)); 3/ ((ATH, C-K), (E-A,  
 1661 P-E)); 4/ (\*C-K, (ATH, (E-A, P-E))); 5/ (C-K, (ATH, (E-A, P-E))); 6/ (ATH, (\*C-K, (E-A, P-E))); 7/  
 1662 (ATH, \*(C-K, (E-A, P-E))); 8/ (ATH, (C-K, (E-A, P-E))), where an asterisk denotes the entry point

1663 of the “proto-American” gene flow. Note that here and in the following, topology notations  
1664 involving ATH, C-K, E-A and P-E denote the PPE component in those populations (unless  
1665 explicitly specified), not the First Peoples component nor the sum of admixed ancestries. In  
1666 summary, E-A and P-E (Saqqaq) are always the closest sister-groups, and the branching  
1667 order of the PPE source populations that contributed to Athabaskans and C-K remains  
1668 ambiguous. Another observation is that models either lacking the “proto-American” gene  
1669 flow into C-K, or with this admixture not exclusive to C-K, are not among the best-fitting  
1670 ones (compare Z-scores for models 1, 2, 4, and 6 and for models 3, 5, 7, and 8 above, Table  
1671 S10.2). Two fitting models of this type are shown in Fig. S10.2 (topologies 2 and 5 listed  
1672 above).

1673 We suspected that the affinity between C-K and First Peoples, which resulted in the  
1674 “proto-American” gene flow emerging as an outcome of the unsupervised branch-adding  
1675 procedure, can be explained in a much simpler way, if we suppose that the C-K/E-A  
1676 admixture was bidirectional allowing us to remove the “proto-American” gene flow. Out of  
1677 18 topologies of this kind, 15 do not fit at all ( $|Z\text{-scores}| > 4$  or  $> 5$ ), while 3 fit with exactly  
1678 the same Z-scores around 2 and the same log-likelihood values: ((ATH, C-K), (E-A, P-E));  
1679 (ATH, (C-K, (E-A, P-E))); (C-K, (ATH, (E-A, P-E))) (see model statistics in Table S10.3). Present-  
1680 day Inuit can also be incorporated into the graph instead of Yup’ik, Ekven or Uelen, but  
1681 cannot be modelled without an additional pulse of European gene flow which plausibly  
1682 reflects colonial admixture (Table S10.3).

1683 Finally, we replaced present-day Athabaskans (4 individuals) with ancient  
1684 Athabaskans (2 individuals), and the impasse was resolved: only one among 6 fitting  
1685 topologies has no trifurcations and has the lowest Z-score and the best log-likelihood value,  
1686 and that is the topology (C-K, (ATH, (E-A, P-E))). The log-likelihood difference between this  
1687 topology and the second-best topologies ((ATH, C-K), (E-A, P-E)) and (ATH, (C-K, (E-A, P-E)))  
1688 ranges from 2 to 2.7, depending on the E-A population. Thus, the best-fitting model is from  
1689 7.2 to 15.5 times more likely than the second-best models, however these likelihood  
1690 differences are non-significant in the case of the transversion-only dataset. See model  
1691 statistics in Table S10.4 and 3 best-fitting graphs with absolute Z-scores  $< 2$  in Fig. S10.3.

1692 Here and in the following, we generally consider likelihood ratios between  
1693 competing models of 20 and higher (corresponding to log-likelihood differences of 3 and  
1694 higher) to be “significant”, provided the two competing models have the same number of  
1695 parameters and are applied to the same data. This can be derived using the Bayesian  
1696 Information Criterion (BIC) for model comparisons, which is defined as  $BIC = -2 \log L + C$ ,  
1697 where  $C$  is a constant factor depending on sample size and number of model parameters,  
1698 and  $L$  is the likelihood. A feature of BIC is the fact that it can be used to approximately  
1699 compute the posterior probability of the model given the data, via  
1700  $p(M|\text{data}) \sim \exp\left(-\frac{BIC}{2}\right) p(M) = L p(M)$ , where  $p(M)$  is the prior probability of the model.  
1701 Using this, and using flat priors, it follows that deciding between two models  $M1$  and  $M2$   
1702 with the same number of parameters and applied to the same data, we can use the  
1703 likelihood ratio directly as an estimate of the ratio of posterior probabilities. It follows that a  
1704 likelihood ratio of 20 or higher corresponds to one model being 20 times more likely (or  
1705 higher) than the other model, which renders the posterior probability for one model being  
1706 below 0.05 and the other above 0.95, which we consider to be significant support for one  
1707 model over the other.

1708 A similar pattern as seen above for the transversion-only dataset is observed for the



1709 full dataset including transitions, but with generally poorer fits: the lowest absolute Z-score  
 1710 equals 2.87 (Table S10.5). In this case, however, the model (C-K, (ATH, (E-A, P-E))) is from 39  
 1711 to 202 times more likely than second-best models ((ATH, C-K), (E-A, P-E)) and (ATH, (C-K, (E-  
 1712 A, P-E))), which according to the arguments above can be considered significant. According  
 1713 to the best models, a low-level C-K admixture of up to 15-20% is characteristic for all Old  
 1714 Bering Sea, Yup'ik and Inuit groups studied here, but not for Aleuts. E-A admixture is  
 1715 inferred in all C-K groups: low levels up to 10% in Koryak and Itelmen, and a higher level (Fig.  
 1716 1a, Extended Data Figs. 2-4 and 8, section 5) in Chukchi, omitted from the C-K meta-  
 1717 population here. The topology favored by this analysis is not only a significantly better fit  
 1718 than the other two including the ((ATH, C-K), (E-A, P-E)) topology favored by Moreno-Mayar  
 1719 et al. (2018), but is also the “simplest” one from the archaeological point of view, as  
 1720 detailed in the Discussion. The topology favored by Moreno-Mayar et al. (2018) - ((ATH, C-  
 1721 K), (E-A, P-E)) - is among the best supported, however it results in a trifurcation (ATH, C-K,  
 1722 (E-A, P-E)) and has a significantly worse log-likelihood (Tables S10.4, S10.5).

1723

1724

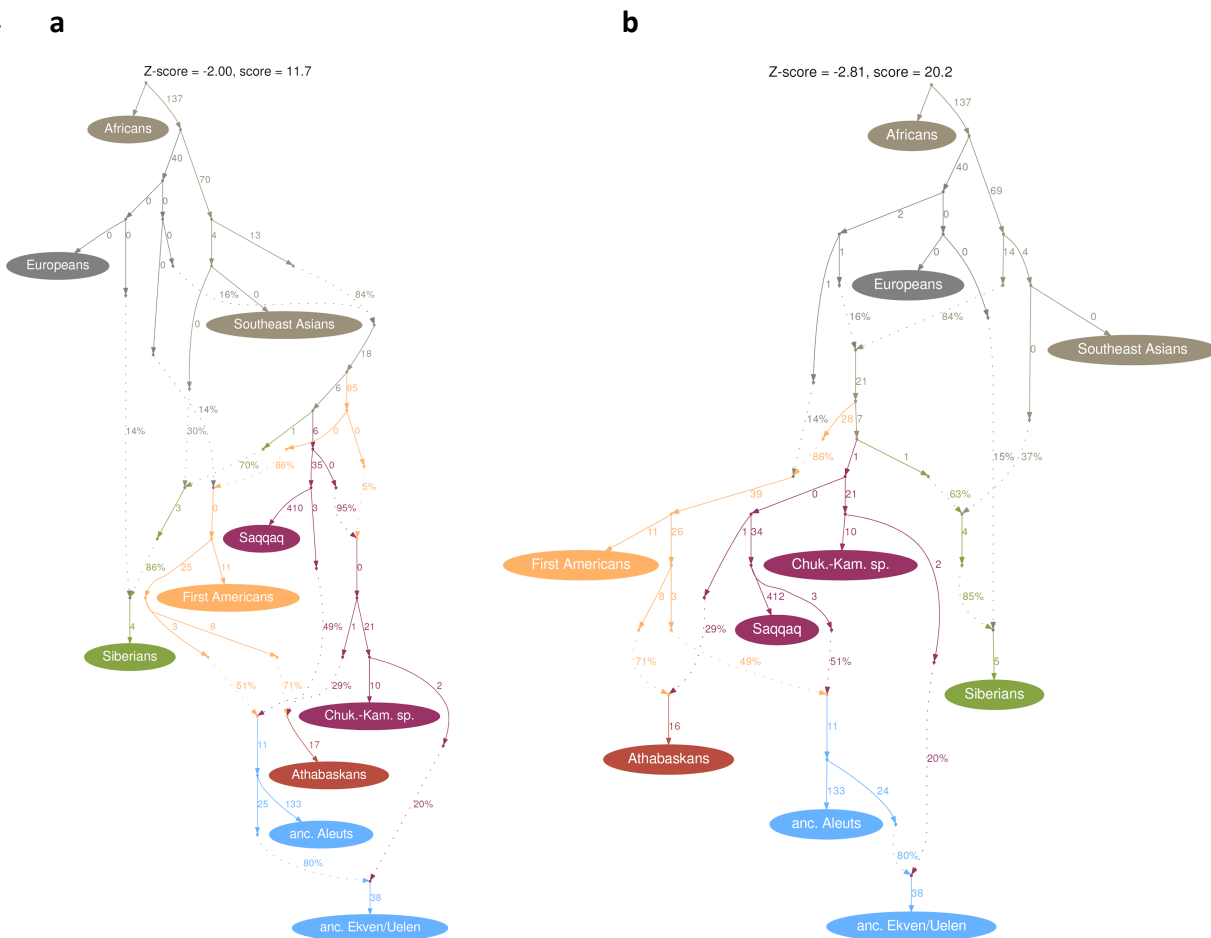

1725 **Fig. S10.2.** Two fitting admixture graphs (based on the transition-free dataset) with unidirectional C-K to E-K  
 1726 gene flow, for other fitting topologies see Table S10.2. **a**, topology (\*(ATH, C-K), (E-A, P-E)); **b**, topology (C-K,  
 1727 (ATH, (E-A, P-E))). The asterisk in the topology notation stands for the entry point of the “proto-American”  
 1728 gene flow.  
 1729

1730

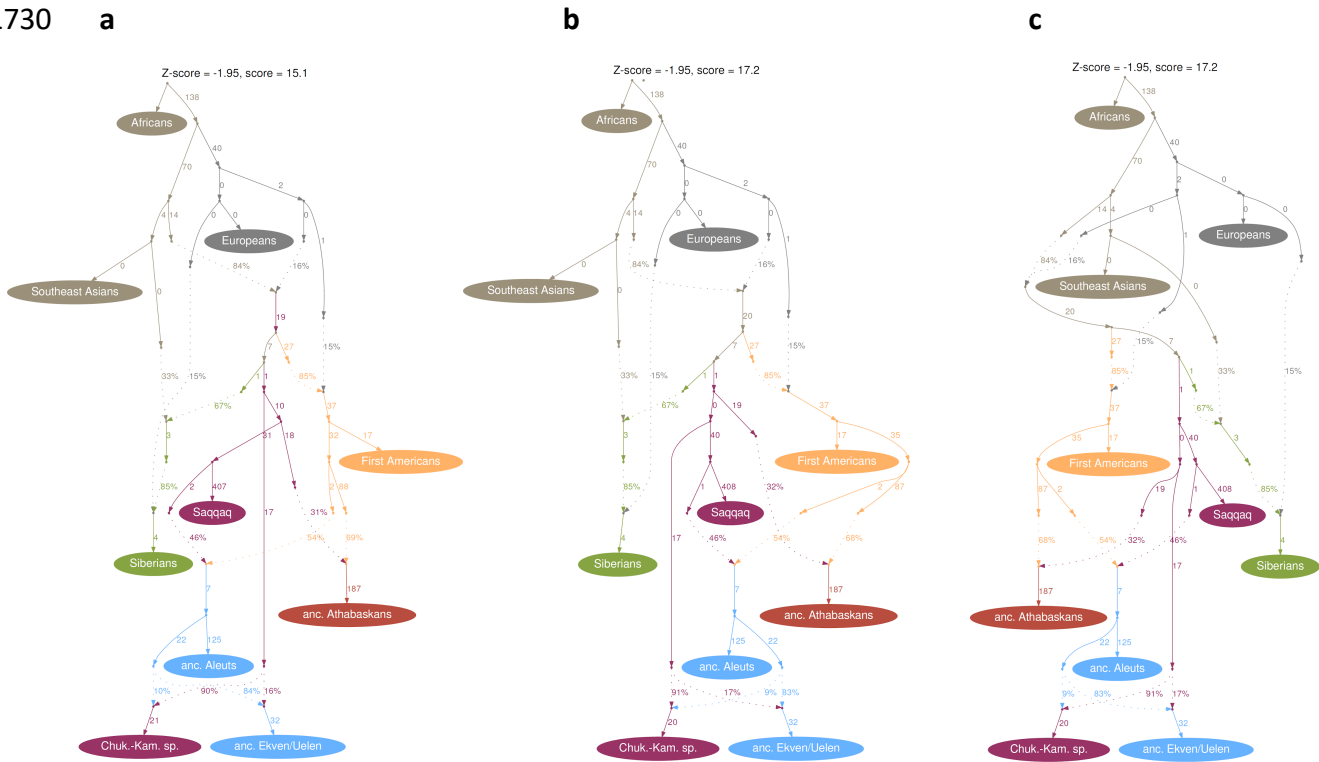

1731

1732 **Fig. S10.3.** Three best-fitting admixture graphs (based on the transition-free dataset) including ancient  
 1733 Athabaskans and a bidirectional C-K to E-A gene flow, for other fitting topologies see Table S10.4. **a**, topology  
 1734 (C-K, (ATH, (E-A, P-E))) having the highest likelihood and, the only fitting topology with no 0-length edges at  
 1735 key positions in the PPE clade; **b**, topology (ATH, (C-K, (E-A, P-E))); **c**, topology ((ATH, C-K), (E-A, P-E)). While the  
 1736 likelihood differences of these models are not significant, they are significant when using the full dataset  
 1737 including transitions, although all models fit worse in that case (see text).

1738

1739 **10.3 Improving the West Eurasian and Native American sub-graphs**

1740 dataset: *transversions only*;

1741 populations: *present-day meta-populations including Northern First Peoples; pseudo-haploid*  
 1742 *Saqqaq, ancient Aleuts, ancient Neo-Eskimos (Ekven+Uelen), ancient Athabaskans, Mal'ta*  
 1743 *(MA1), Loschbour, and the ancient Upward Sun River 1 individual.*

1744 Next, we attempted to construct a more realistic model and added further ancient  
 1745 individuals onto the best-fitting graph including the merged Ekven+Uelen Old Bering Sea  
 1746 population and ancient Athabaskans. First, we tested all 5 possible placements of the  
 1747 Upward Sun River 1 individual (USR1, Moreno-Mayar et al. 2018) as an unadmixed branch  
 1748 within the First Peoples clade (Table S10.6). As demonstrated by Moreno-Mayar et al.  
 1749 (2018), USR1 occupies the most basal position within the clade, and this topology is by far  
 1750 the most supported. In parallel, we attempted constructing a more realistic model for  
 1751 present-day Europeans as a mixture of three sources (Lazaridis et al. 2014): western hunter-  
 1752 gatherers (WHG, represented by the Loschbour individual, Lazaridis et al. 2014); Siberian  
 1753 Paleolithic hunter-gatherers of European origin, also known as ancient North Eurasians (the  
 1754 Mal'ta 1 individual a.k.a. MA1, Raghavan et al. 2014); and early European farmers (EEF) with  
 1755 substantial basal Eurasian ancestry (Haak et al. 2015, Lazaridis et al. 2016), here represented  
 1756 by a ghost basal Eurasian branch. The Mal'ta-related gene flow was mediated by Yamnaya  
 1757 steppe pastoralists and followed the initial WHG-EEF admixture event (Allentoft et al. 2015,

1758 Haak et al. 2015). We constructed our models accordingly: first, a group related to WHG  
1759 admixed with the basal Eurasian branch; second, a Mal'ta-related West Eurasian lineage  
1760 contributed to First Peoples, Siberians/PPE, and Europeans.

1761 Initially we tested simpler models, where Europeans = a West Eurasian lineage + a  
1762 basal Eurasian lineage. On this graph we tested all possible split points of MA1 within the  
1763 West Eurasian clade (Table S10.7). Although all Z-scores were the same, the topology ((EUR,  
1764 SIB), (MA1, (NEA, SAM))) was the single most plausible one from the perspective that it  
1765 resulted in the smallest number of 0-length edges at key positions within the West Eurasian  
1766 clade, and at the same time the basal Eurasian contribution in present-day Europeans was  
1767 not overestimated (Fig. S10.4a). SIB here stands for the recent European admixture source  
1768 in present-day Siberians, NEA and SAM - for Mal'ta-related admixture sources in northeast  
1769 Asians (a group uniting Siberians, PPE, and Native Americans) and in Native Americans,  
1770 respectively. Then we added WHG (Loschbour) onto the best graph from the previous step,  
1771 switched to the 3-component model for Europeans described above, and tried to derive the  
1772 gene flow into Europeans from all possible branches within the Mal'ta clade (Table S10.7).  
1773 The topology ((WHG, (EUR<, SIB)), <(MA1, (NEA, SAM))) was probably the best one: it  
1774 resulted in the smallest number of 0-length edges at key positions within the West Eurasian  
1775 clade, and at the same time the basal Eurasian contribution in present-day Europeans was  
1776 not overestimated (Fig. S10.4b). The "<" signs here show the direction of the Mal'ta-related  
1777 gene flow in Europeans: from the (MA1, (NEA, SAM)) clade into EUR. We acknowledge that  
1778 the model for Europeans should be even more complex and include Early European farmers  
1779 and Yamnaya pastoralists or related herder groups explicitly. The latter population can be  
1780 modelled as a roughly 50%-50% mixture of Mal'ta-related eastern hunter-gatherers (EHG)  
1781 and Iranian farmers or related Caucasian hunter-gatherers (CHG) (Lazaridis et al. 2016). But  
1782 in order to keep the number of groups in our final model (presented below) reasonably  
1783 small, we preferred the simplified version that is anyway much more complex than the  
1784 initial version including unadmixed Europeans (Fig. S10.3).

1785 Next, we combined in the same model the updated West Eurasian clade with the  
1786 updated Native American clade including the USR1 individual (associated with a major basal  
1787 Native American population, termed Ancient Beringians (Moreno-Mayar et al 2018)), and  
1788 again tried to derive the gene flow into Europeans from all possible branches within the  
1789 Mal'ta clade (Table S10.8). The same best topology was recovered as in the previous search:  
1790 ((WHG, (EUR<, SIB)), <(MA1, (NEA, SAM))). We further tested whether any USR1-related  
1791 gene flow into Athabaskans improves the model fit. USR1 is associated with the Denali  
1792 complex (Potter et al. 2014), which was replaced by the Northern Archaic tradition ca. 6000  
1793 calBP (Potter 2010). The Northern Archaic tradition likely includes ancestors of Na-Dene  
1794 speakers given its geographic distribution and continuity with the recent past (Workman  
1795 1978). We tested various entry points for the USR1-related gene flow: into the common  
1796 ancestor of ATH and the Native American source population of E-A, into ATH only, and into  
1797 E-A ancestors only, and combined these topologies with 5 possible topologies of the Mal'ta-  
1798 related gene flow into EUR. All models had 0-length edges at key positions in the Native  
1799 American clade, or 0% admixture from the USR1 lineage in other lineages, or the model-  
1800 fitting process failed (Table S10.8). Hence, we conclude that the gene flow from the USR1  
1801 branch into the Northern North American clade is unlikely to improve the model fit. This  
1802 suggests Ancient Beringians were replaced by Northern Native Americans (including Na-  
1803 Dene) around 6000 calBP in interior Alaska.

1804

1805

a

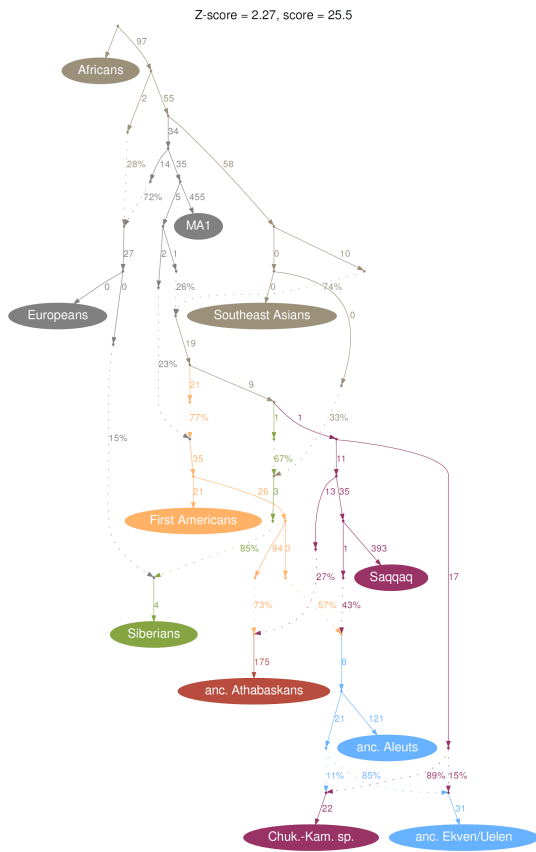

b

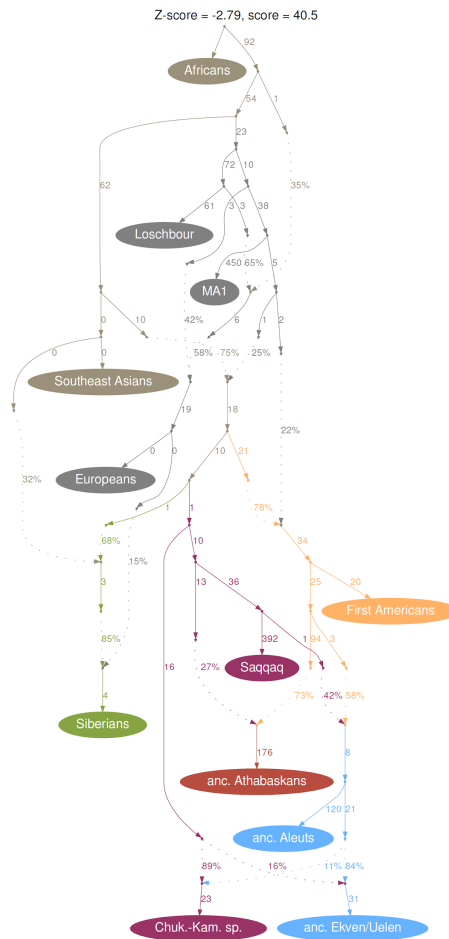

1806

1807 **Fig. S10.4.** Best-fitting admixture graphs (based on the transition-free dataset) including a two-component (a)  
 1808 or a three-component (b) model for Europeans.

1809

1810 We next included into the model other representatives of the Northern North  
 1811 American clade (a.k.a. Northern First Peoples or NAM) (Raghavan et al. 2015, Lindo et al.  
 1812 2017, Scheib et al. 2018) besides Athabaskans: two Cree and one Tsimshian individual. This  
 1813 NAM branch required a recent European admixture and was placed at all possible positions  
 1814 within the Native American clade. Each topology was combined initially with the best 2-  
 1815 component model for Europeans, and also with three best-fitting 3-component models  
 1816 tested previously (Table S10.9). The best-fitting model of the latter class has a  $|Z\text{-score}|$  of  
 1817 3.12, has no 0-length edges at key positions within the Native American, West Eurasian, and  
 1818 PPE clades, and the basal Eurasian contribution into Europeans stands at 34% (Fig. S10.5).  
 1819 Thus, the main part of the modeling process was finished. We believe that the Z-score of  
 1820 3.12, although being higher than the commonly accepted threshold of 3, is a reasonably low  
 1821 score for such a complex model composed of 14 groups: present-day composite meta-  
 1822 populations and ancient individuals. The best model fits the data with only two outlying  $f_4$ -  
 1823 statistics with  $|Z\text{-scores}| > 3$  (Table S10.10):

1824 a)  $f_4$ (Southern First Peoples, USR1; ancient Aleuts, MA1), with the observed value larger  
 1825 than the expected value, Z-score = 3.123;

1826 b)  $f_4$ (Southern First Peoples, USR1; Ekven+Uelen, MA1), with the observed value larger than  
 1827 the expected value, Z-score = 3.034.

1828           These deviations might reflect elevated Mal'ta-related ancestry in the USR1  
1829 individual as compared to Southern First Peoples. To keep this complex graph as simple as  
1830 possible, we avoided modeling separate Mal'ta-related gene flows into all relevant groups  
1831 since that would add 7 admixture events on top of 11 modelled currently.

1832           Finally, we re-tested three by far best-fitting alternative topologies in the PPE clade  
1833 (Table S10.4, Fig. S10.3) on the background of this complex model (Table S10.11). The  
1834 topology (ATH, (C-K, (E-A, P-E))) (here again referring to the PPE components in those  
1835 groups) resulted in a 0-length edge (a trifurcation), and the other two topologies showed no  
1836 0-length edges. The topology (C-K, (ATH, (E-A, P-E))) as compared to the topology ((ATH, C-  
1837 K), (E-A, P-E)) published by Moreno-Mayar et al. (2018) had a 5.7 times higher likelihood and  
1838 a slightly lower number of outlying  $f_4$ -statistics with absolute Z-scores  $> 2$ , 137 vs. 138  
1839 statistics (Table S10.11). A similar result was observed for the full dataset with transitions  
1840 included: the topology (C-K, (ATH, (E-A, P-E))) as compared to the topology ((ATH, C-K), (E-A,  
1841 P-E)) had a 9.4 times higher likelihood and a lower number of outlying  $f_4$ -statistics with  
1842 absolute Z-scores  $> 2$ , 322 vs. 340 statistics (Table S10.11). The likelihood differences  
1843 observed are suggestive, but not significant, and thus do not allow us to confidently pick  
1844 one model. However, significant likelihood differences were observed for the simpler graph  
1845 and the full dataset including transitions (see section 10.2). *Rarecoal*, another demographic  
1846 modeling method we used, also provides better resolution (see section 9).

1847

#### 1848 **10.4 Testing all possible combinations of populations at key branches**

1849 dataset: *transversions only*;

1850 populations: *separate present-day populations; pseudo-haploid Saqqaq, ancient Aleuts,*  
1851 *ancient Neo-Eskimos (Ekven, Uelen), ancient Athabaskans, Mal'ta (MA1), Loschbour, ancient*  
1852 *Upward Sun River 1 individual.*

1853 To explore the best model further, instead of meta-populations we tested all possible  
1854 combinations of separate populations. First, we returned to a simple model without the  
1855 MA1, Loschbour, USR1, and NAM clades (Z-score = 1.95, Table S10.4, Fig. S10.3a) and tested  
1856 separate populations in the merged SGDP+Raghavan et al.+ancient dataset (Supplementary  
1857 Table 4) composed of two or more individuals at the following five branches in the graph : E-  
1858 A (3 populations: Ekven, Uelen, Yup'ik; present-day Inuit cannot be simply integrated into  
1859 this model since they require an additional pulse of recent European admixture); EUR (16  
1860 populations); SAM (7 populations, excluding Mayans and Mixtec having low-level European  
1861 and/or African admixture); SEA (8 populations); SIB (10 populations, including an Ust'-Belaya  
1862 Angara individual I7760 having the West Siberian genetic profile (section 4), abbreviated as  
1863 UBS). To replace populations that were removed due to the minimum size requirement of 2  
1864 individuals, we considered some additional populations (Table S10.12) that were not  
1865 included into the original meta-populations as defined in Table S10.1. Among 26,880 models  
1866 tested, just 7% were non-fitting ( $|Z\text{-score}| > 3$ ), and for one model the algorithm failed.  
1867 Absolute Z-scores down to 0.91 were observed (2.19 on average among all models), and in 7  
1868 graphs no 0-length edges were found (4.9 on average among all models). See Table S10.12  
1869 for a full list of tested models and summary statistics. Since the simple topology is fitting for  
1870 almost all combinations of populations, it is unlikely that the observed result depends on  
1871 the composition of meta-populations.

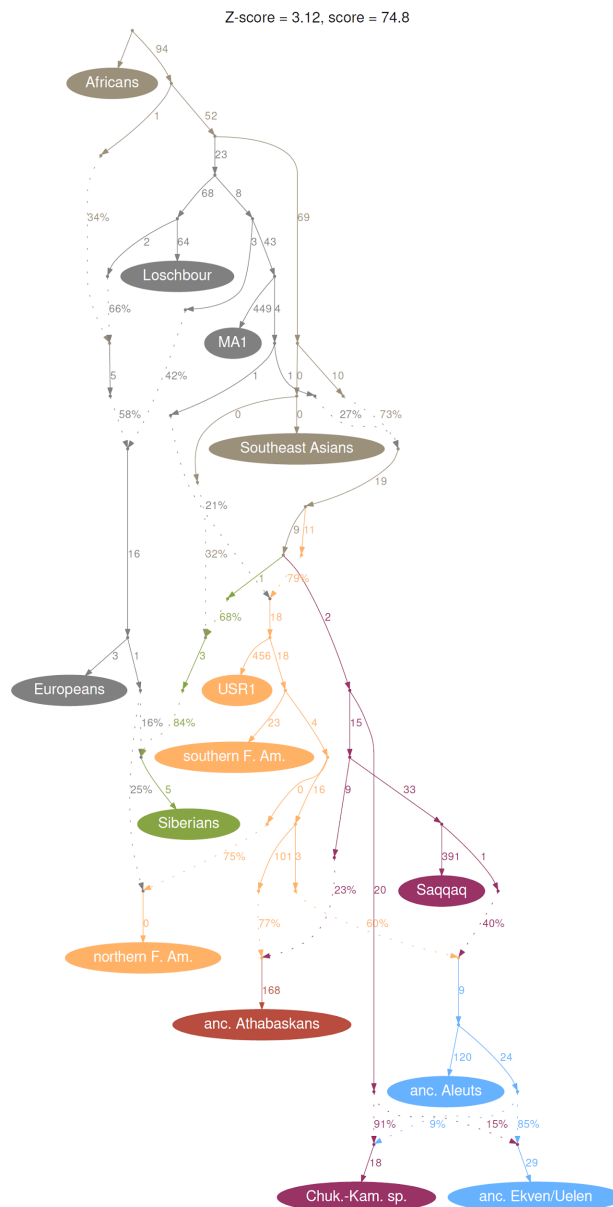

1872

1873

1874

1875

**Fig. S10.5.** The best-fitting admixture graph (based on the transition-free dataset) featuring a three-component model for Europeans and a complex American clade including the ancient USSR1 individual and present-day Northern First Peoples (NAM).

1876

1877

1878

1879

1880

1881

1882

1883

1884

1885

Second, we attempted an even more exhaustive testing of population combinations at 6 branches for the most complex model (Z-score = 3.12, Fig. S10.5). We relaxed the population size requirement of 2 or more individuals and took the following populations (Table S10.13): E-A (3 populations: Ekven, Uelen, Yup'ik); EUR (19 populations); SAM (13 populations, including the Clovis ancient individual); NAM (2 populations); SEA (9 populations); SIB (10 populations, including the Ust'-Belaya Angara ancient individual I7760). Among 133,380 models tested, 12% had a  $|Z\text{-score}| < 4$ . Absolute Z-scores down to 2.98 were observed, and 4.8% of graphs had no 0-length edges at key positions within the EUR, PPE, and Native American clades.

1886

1887

1888

We also re-tested three by far best-fitting alternative topologies in the PPE clade (Table S10.4, Fig. S10.3) on the background of this complex model with separate populations. First, we took 1,831 population combinations that yielded absolute Z-scores <

1889 3.5 for the (C-K, (ATH, (E-A, P-E))) topology (Table S10.13) and tested the three topologies  
1890 (Table S10.11). The topology (ATH, (C-K, (E-A, P-E))) was the worst one according to all  
1891 metrics, and it also had the lowest likelihood among the three best meta-population-based  
1892 models (Table S10.11), therefore we excluded it from further testing. Then we tested  
1893 133,380 population combinations for the topologies (C-K, (ATH, (E-A, P-E))) and ((ATH, C-K),  
1894 (E-A, P-E))). We find that both topologies are favored by some combinations of populations,  
1895 with the topology (C-K, (ATH, (E-A, P-E))) winning more often in terms of absolute Z-scores  
1896 and higher likelihoods than the topology ((ATH, C-K), (E-A, P-E)) (Table S10.14). Although the  
1897 distributions of likelihoods over 133,380 population combinations are largely overlapping  
1898 (Table S10.14), median likelihood of the topology (C-K, (ATH, (E-A, P-E))) is 58.5 higher than  
1899 that of the topology ((ATH, C-K), (E-A, P-E)), a significant difference according to our  
1900 arguments from section 10.2. On average, the topology ((ATH, C-K), (E-A, P-E)) also yields  
1901 more 0-length edges within the PPE clade (2.3 vs. 1.5 edges), which in particular includes  
1902 many cases with a trifurcation of the form (ATH, C-K, (E-A, P-E)), and also yields a larger  
1903 number of outlying  $f_4$ -statistics with absolute Z-scores  $> 2$  (409 vs. 379 statistics).

1904 Overall, the outcome of the model testing with separate populations is the same as  
1905 that of the meta-population approach, which arguably has a higher resolution due to larger  
1906 number of individuals per populations, and may be less prone to overfitting. Thus, we favor  
1907 the topology (C-K, (ATH, (E-A, P-E))) over the alternative ((C-K, ATH), (E-A, P-E)), although the  
1908 difficulty of distinguishing between the two topologies may also reflect the possibility of a  
1909 near-trifurcation of the three groups C-K, ATH, and (E-A, P-E).

1910 To obtain an independent hypothesis test for the PPE topology, we performed  
1911 demographic modeling with *Rarecoal* (section 9), as well as exhaustive testing of population  
1912 triplets and quadruplets using *qpWave* and *qpAdm* with various outgroup sets (section 5).

1913

#### 1914 *References (for this section)*

- 1915 Allentoft, M. E. *et al.* Population genomics of Bronze Age Eurasia. *Nature* **522**, 167–172.  
1916 Haak, W. *et al.* Massive migration from the steppe was a source for Indo-European languages in Europe. *Nature*  
1917 **522**, 207–211 (2015).  
1918 Lazaridis, I. *et al.* Ancient human genomes suggest three ancestral populations for present-day Europeans. *Nature*  
1919 **513**, 409–413 (2014).  
1920 Lazaridis, I. *et al.* Genomic Insights into the Origin of Farming in the Ancient Near East. *Nature* **536**, 419–424  
1921 (2016).  
1922 Lindo, J. *et al.* Ancient individuals from the North American Northwest Coast reveal 10,000 years of regional  
1923 genetic continuity. *Proc. Natl. Acad. Sci. U. S. A.* **114**, 4093–4098 (2017).  
1924 Moreno-Mayar, J. V. *et al.* Terminal Pleistocene Alaskan genome reveals first founding population of Native  
1925 Americans. *Nature* **553**, 203–207 (2018).  
1926 Potter, B. A. Archaeological patterning in Northeast Asia and Northwest North America: an examination of the  
1927 Dene-Yeniseian hypothesis. *The Dene-Yeniseian Connection*, ed. Kari, J., Potter, B. A. *Anthropological Papers*  
1928 *of the University of Alaska: New Series* **5**, 138–167 (2010).  
1929 Potter, B. A. *et al.* New insights into Eastern Beringian mortuary behavior: a terminal Pleistocene double infant  
1930 burial at Upward Sun River. *Proc. Natl. Acad. Sci. U. S. A.* **111**, :17060–17065 (2014).  
1931 Raghavan, M. *et al.* Upper Palaeolithic Siberian genome reveals dual ancestry of Native Americans. *Nature* **505**,  
1932 87–91 (2014).  
1933 Raghavan, M. *et al.* Genomic evidence for the Pleistocene and recent population history of Native Americans.  
1934 *Science* **349**, 1–20 (2015).  
1935 Scheib, C. L. *et al.* Ancient human parallel lineages within North America contributed to a coastal expansion.  
1936 *Science* **360**, 1024–1027 (2018).  
1937 Workman, W. B. The Prehistory of the Aishihik-Kluane area, southwest Yukon Territory. *National Museum of Man*,  
1938 *Mercury Series* No. 74 (1978).

## 1939 **Supplementary Information section 11**

### 1940 **Additional results on Aleutian population history**

1941

1942 A controversial chapter of American Arctic prehistory concerns Aleuts (Balter 2012). The  
1943 Aleutian Islands were settled much earlier than the American Arctic, about 9,000 calBP  
1944 (Hatfield 2010), and discontinuities in the Aleutian archaeological record were observed at  
1945 ~4,500 calBP (Knecht and Davis 2001, Hatfield 2010, Davis et al. 2016) and at ~800 – 900  
1946 calBP (Brenner Coltrain et al. 2006, Hatfield 2010). The first discontinuity was associated  
1947 with Paleo-Eskimo influence, which is consistent with the final model presented in this  
1948 study, and the latter with Neo-Eskimo influence, although the extent of technological  
1949 interactions, and the role of genetic continuity vs. population replacement is debated  
1950 (Brenner Coltrain et al. 2006, Smith et al. 2009, Misarti and Maschner et al. 2015). Three  
1951 burial sites in the eastern Aleutian Islands received most attention so far: the Chaluka  
1952 midden site on the Umnak Island was associated with an early population (3,600 – 300  
1953 calBP) with a dolichocranic morphology, inhumation burials (Hrdlička 1945, Brenner Coltrain  
1954 et al. 2006) and a predominance of mtDNA haplogroup A2a (Smith et al. 2009). Other sites,  
1955 at the Kagamil and Ship Rock Islands, were associated with a later population (800 – 900  
1956 calBP and later), a brachycranial morphology, mummification burials (Hrdlička 1945, Brenner  
1957 Coltrain et al. 2006) and a predominance of mtDNA haplogroup D2a (Smith et al. 2009). The  
1958 former population has been historically termed Paleo-Aleut, and the latter Neo-Aleut.

1959 We carried out a small-scale sampling of ancient genomes from all three sites  
1960 (Extended Data Table 1). Radiocarbon dates obtained for these individuals in a previous  
1961 study (Brenner Coltrain et al. 2006) were recalibrated using a more appropriate marine  
1962 reservoir correction (Misarti and Maschner 2015) resulting in the following median dates:  
1963 2,050 – 530 calBP for Paleo-Aleuts and 580 – 280 calBP for Neo-Aleuts (Supplementary  
1964 Table 2, Supplementary Information section 2). Among 11 ancient Aleuts subjected to in-  
1965 solution target enrichment of more than 1.2 million SNPs using a protocol by Fu *et al.*  
1966 (2015), 4 Neo-Aleuts and 2 Paleo-Aleuts passed the 70% missing rate cut-offs that we  
1967 applied in order to permit high-density SNP analyses and were incorporated into both the  
1968 HumanOrigins and Illumina SNP array datasets (Supplementary Table 4). In addition, one  
1969 Paleo-Aleut individual dated to 700 – 310 calBP (IDs I0719 and 378620, the latter used by  
1970 Brenner Coltrain et al. 2006) was sequenced with the shotgun approach at 2.3x coverage  
1971 (with filtered reads). Due to low coverage of both the enrichment and shotgun data, only  
1972 pseudo-haploid SNP calls were generated for ancient Aleuts, hence these samples were  
1973 used for *qpWave/qpAdm*, *PCA*, *ADMIXTURE*, *ALDER*, and rare allele sharing analyses only.

1974 Analyzing these data, we found that four Neo-Aleut samples with median dates  
1975 between 580 – 340 calBP and two Paleo-Aleut samples dated to 1260 – 870 and 700 – 310  
1976 calBP are indistinguishable. In particular, in both the HumanOrigins and Illumina datasets,  
1977 the Paleo- and Neo-Aleuts were indistinguishable according to *PCA* (Fig. 1a, Extended Data  
1978 Fig. 2, section 4) and *ADMIXTURE* patterns (Extended Data Fig. 8), showing that the Neo-  
1979 Aleuts arose directly from the Paleo-Aleuts and contradicting suggestions – based on  
1980 morphology (Hrdlička 1945) and mitochondrial DNA haplogroup frequency changes (Smith  
1981 et al. 2009) – that the transition between Paleo- and Neo-Aleuts was driven by a new  
1982 migration into the islands from the outside. Pooling the six ancient Aleuts together for  
1983 *qpWave/qpAdm* and *qpGraph* analyses (sections 5 and 10), we find that both groups have a  
1984 strong Neo-Eskimo genetic affiliation, and in this respect are similar to present-day Aleuts.



1985 In addition, the single Paleo-Aleut genome (I0719) that we generated was placed into the  
 1986 Aleut branch with high certainty using *Rarecoal* (Fig. 2b, section 9).

1987 We also used this first data from the Aleutian Islands prior to European colonization  
 1988 to test a claim by Raghavan *et al.* (2015) of a genetic affinity between Papuans and Aleuts.  
 1989 The original study attempted to account for the substantial amounts of recent European  
 1990 ancestry in the present-day Aleutian individuals analyzed by identifying and excluding  
 1991 segments of the genomes that could be reliably called as European in ancestry. However,  
 1992 this procedure could in principle have introduced bias that affected the original reported  
 1993 signal that had a significance level of  $Z=2$  to  $Z=3$  (because the ancestry inference is not  
 1994 perfect and may selectively exclude segments of non-colonial ancestry with greater or lesser  
 1995 affinity to Papuans). We thus used *D*-statistics to test whether there was evidence of an  
 1996 excess affinity to Papuans in the ancient Aleuts, using a variety of subsets of the data, but  
 1997 find no evidence of an excess affinity to Papuans ( $Z < 2$ ) (Table S11.1). These results suggest  
 1998 that an excess affinity to Australo-Melanesians is exclusively found in South America and  
 1999 primarily observed in Amazonian populations (Skoglund *et al.* 2015).

2000

2001 **Table S11.1.** Aleutian ancient DNA shows no evidence of Papuan-related gene flow hypothesized by Raghavan  
 2002 *et al.* (2015) on the basis of present-day European-admixed Aleuts. The following *D*-statistics were calculated:  
 2003  $D(A, B; X, Y)$ , where A=Yoruba or Dai; B=Papuans, Australians, or Onge; X=Mixe; Y=Neo-Aleuts, Paleo-Aleuts,  
 2004 Ancient Aleuts combined, or Surui. Z-scores are color-coded:  $Z > 3$  in red, and  $2 < Z < 3$  in yellow.

| dataset                                           | treatment       | pop A, pop B             | pop X | pop Y          |             |          |         |                  |             |          |         |
|---------------------------------------------------|-----------------|--------------------------|-------|----------------|-------------|----------|---------|------------------|-------------|----------|---------|
|                                                   |                 |                          |       | ancient Aleuts |             |          |         | ancient Aleuts   |             |          |         |
|                                                   |                 |                          |       | Neo-Aleut      | Paleo-Aleut | combined | Surui   | Neo-Aleut        | Paleo-Aleut | combined | Surui   |
|                                                   |                 |                          |       | Z-scores       |             |          |         | informative SNPs |             |          |         |
| HumanOrigins<br>(Lazaridis <i>et al.</i><br>2014) | normal          | Yoruba, Australian       | Mixe  | 0.7            | 1.63        | 1.43     | 1.67    | 272,013          | 275,100     | 306,158  | 314,186 |
|                                                   |                 | Yoruba, Papuan           |       | 0.65           | 1.46        | 1.31     | 2.88    | 274,210          | 277,200     | 308,606  | 316,685 |
|                                                   |                 | Yoruba, Onge             |       | 0.85           | 1.32        | 1.41     | 3.87    | 273,679          | 276,757     | 308,026  | 316,118 |
|                                                   |                 | Dai, Australian          |       | -1.34          | -0.91       | -1.21    | 1.08    | 262,660          | 265,765     | 295,150  | 302,843 |
|                                                   |                 | Dai, Papuan              |       | -1.51          | -1.28       | -1.52    | 2.29    | 267,002          | 270,010     | 300,081  | 307,977 |
|                                                   | Dai, Onge       | -1.54                    |       | -1.78          | -1.79       | 3.26     | 265,435 | 268,527          | 298,351     | 306,289  |         |
|                                                   | no transitions  | Yoruba, Australian       |       | -0.18          | 0.76        | 0.06     | 0.85    | 50,109           | 51,071      | 56,733   | 58,428  |
|                                                   |                 | Yoruba, Papuan           |       | -0.34          | 1.18        | -0.03    | 2.11    | 50,487           | 51,441      | 57,158   | 58,866  |
|                                                   |                 | Yoruba, Onge             |       | 0.15           | 1.29        | 0.83     | 3       | 50,415           | 51,366      | 57,073   | 58,770  |
|                                                   |                 | Dai, Australian          |       | -1.53          | -1.29       | -1.69    | 0.72    | 48,383           | 49,290      | 54,706   | 56,306  |
| Dai, Papuan                                       |                 | -1.74                    | -1.03 | -1.93          | 2.05        | 49,161   | 50,067  | 55,601           | 57,250      |          |         |
| Dai, Onge                                         | -1.43           | -1.11                    | -1.24 | 3.08           | 48,864      | 49,762   | 55,263  | 56,918           |             |          |         |
| genomes<br>(Mallick <i>et al.</i><br>2016)        | normal          | Yoruba.DG, Australian.DG | 2.01  | 2.68           | 2.37        | 3.65     | 433,909 | 405,920          | 494,182     | 506,885  |         |
|                                                   |                 | Yoruba.DG, Papuan.DG     | 1.56  | 1.9            | 1.86        | 4.06     | 459,513 | 428,834          | 523,154     | 536,078  |         |
|                                                   |                 | Yoruba.DG, Onge.DG       | 2     | 2.01           | 2.25        | 3.27     | 432,997 | 405,045          | 493,166     | 506,158  |         |
|                                                   |                 | Dai.DG, Australian.DG    | -1.28 | -0.92          | -1.24       | 2.13     | 442,560 | 413,584          | 503,073     | 516,854  |         |
|                                                   |                 | Dai.DG, Papuan.DG        | -1.96 | -2.02          | -2.09       | 2.68     | 460,213 | 429,322          | 523,311     | 536,979  |         |
|                                                   | Dai.DG, Onge.DG | -1.35                    | -1.65 | -1.45          | 1.59        | 441,305  | 412,384 | 501,610          | 515,733     |          |         |
|                                                   | no transitions  | Yoruba.DG, Australian.DG | 0.8   | 1.3            | 0.95        | 1.62     | 84,512  | 79,527           | 97,011      | 101,213  |         |
|                                                   |                 | Yoruba.DG, Papuan.DG     | 0.76  | 1.58           | 1.05        | 2.66     | 89,441  | 83,985           | 102,642     | 107,037  |         |
|                                                   |                 | Yoruba.DG, Onge.DG       | 1.65  | 2.81           | 2.59        | 2.05     | 84,355  | 79,368           | 96,826      | 101,115  |         |
|                                                   |                 | Dai.DG, Australian.DG    | -1.75 | -2.11          | -2.2        | 1.06     | 86,131  | 80,979           | 98,740      | 103,131  |         |
| Dai.DG, Papuan.DG                                 |                 | -1.94                    | -2.13 | -2.36          | 2.18        | 89,599   | 84,130  | 102,768          | 107,298     |          |         |
| Dai.DG, Onge.DG                                   | -0.88           | -0.56                    | -0.6  | 1.38           | 85,861      | 80,703   | 98,441  | 102,861          |             |          |         |

2006

2007 *References (for this section)*

2008 Balter, M. The peopling of the Aleutians. *Science* **335**, 158–161 (2012).  
 2009 Brenner Coltrain, J. B., Hayes, M.G. & O'Rourke D.H. Hrdlička's Aleutian population-replacement hypothesis. A  
 2010 radiometric evaluation. *Curr. Anthropol.* **47**, 537–548 (2006).  
 2011 Davis, R., Knecht, R. & Rogers, J. First Maritime Cultures of the Aleutians. *The Oxford Handbook of the Prehistoric*  
 2012 *Arctic*, ed. Friesen, T. M., Mason, O. K. New York: Oxford University Press. 279–302 (2016).  
 2013 Fu, Q. *et al.* An early modern human from Romania with a recent Neanderthal ancestor. *Nature* **524**, 216–219  
 2014 (2015).  
 2015 Hatfield, V. L. Material culture across the Aleutian archipelago. *Hum. Biol.* **82**, 525–556 (2010).

- 2016 Hrdlička, A. *The Aleutian and Commander Islands and their inhabitants*. Philadelphia: Wistar Institute of  
2017 Anatomy and Biology (1945).
- 2018 Knecht, R. A. & Davis, R. S. A prehistoric sequence for the eastern Aleutians. *Archaeology in the Aleut zone of*  
2019 *Alaska: Some recent research*, ed. Dumond, D. *University of Oregon Anthropological Papers* **58**, 269–288  
2020 (2001).
- 2021 Misarti, N. & Maschner, H. D. G. The Paleo-Aleut to Neo-Aleut transition revisited. *J. Anthropol. Archaeol.* **37**,  
2022 67–84 (2015).
- 2023 Raghavan, M. *et al.* Genomic evidence for the Pleistocene and recent population history of Native Americans.  
2024 *Science* **349**, 1–20 (2015).
- 2025 Skoglund, P. *et al.* Genetic evidence for two founding populations of the Americas. *Nature* **525**, 104–108  
2026 (2015).
- 2027 Smith, S. *et al.* Inferring population continuity versus replacement with aDNA: A cautionary tale from the  
2028 Aleutian Islands. *Hum. Biol.* **81**, 19–38 (2009).
- 2029

## 2030 **Supplementary Information section 12**

### 2031 **Dating admixture events using *ALDER***

2032

2033 We have dated the Paleo-Eskimo admixture event in Na-Dene speakers using the  
2034 *GLOBETROTTER* method (section 7). In addition, we applied a different linkage  
2035 disequilibrium (LD)-based method, *ALDER*, that relies on allele frequency data at SNP sites  
2036 and can accommodate pseudo-haploid ancient data (Loh et al. 2013). Although a single-  
2037 pulse admixture model implemented in *ALDER* is likely to be an oversimplification, it can still  
2038 provide a reasonable time frame for the admixture events. *ALDER v.1.03* works in the  
2039 following way (Loh et al. 2013): 1/ builds a weighted LD-decay curve given a test population  
2040 and a pair of reference populations related to the admixture partners; 2/ estimates a  
2041 jackknife-based  $p$ -value and Z-score by leaving out each chromosome in turn and refitting  
2042 the decay curve; 3/ determines the distance to which LD in the test population is  
2043 significantly correlated with LD in either reference A or reference B; 4/ to minimize signal  
2044 from shared demographic history, data from SNP pairs at distances smaller than this  
2045 correlation threshold are ignored; 4/ computes additional LD curves and associated  $p$ -values  
2046 and Z-scores, substituting either reference A or B by the test population. If the test  
2047 population is admixed between populations related to references A and B, the one-  
2048 reference curves are expected to pick up the same LD decay signal. If the test population is  
2049 not admixed but has experienced a shared bottleneck with one of the reference groups, an  
2050 LD decay curve is unlikely to emerge. Thus, if the two-reference test and both one-reference  
2051 tests yield Z-scores  $> 2$ , the *ALDER* test is considered successful. This test procedure is  
2052 intended to be conservative (Loh et al. 2013).

2053 In Table S12.1 *ALDER* results for present-day and ancient E-A groups are  
2054 summarized. Outcomes of two-reference tests that yielded  $p$ -values  $< 0.05$  (Z-scores  $> 2$ ) are  
2055 shown. Target groups composed of 4 or more individuals were suitable for this analysis.  
2056 Various First Peoples (SAM or NAM) and Saqqaq were used as surrogates for the admixture  
2057 partners. Given the strong support we have obtained for the *qpGraph* and *qpAdm* models  
2058 “E-A = FAM + P-E” (sections 5 and 10), we expected similar models to be supported by  
2059 *ALDER*. On the other hand, the additional pulse of C-K admixture in Yup’ik and Inuit  
2060 ancestors is expected to compromise the *ALDER* results: populations with complicated  
2061 histories (e.g., multiple waves of admixture) often have different estimates of admixture  
2062 dates with one- and two-reference LD-decay curves (Loh et al. 2013).

2063 Here we consider the *ALDER* results population by population (HumanOrigins  
2064 dataset, Table S12.1). First, for Iñupiat, a relatively large present-day population of 15  
2065 individuals without noticeable colonial European admixture and having a low level of C-K  
2066 admixture (judging by the overall PPE ancestry proportion, see section 5), most *ALDER*  
2067 admixture tests were successful (16 of 22 tests with different FAM references), and a  
2068 further 5 tests were nearly successful (Z-scores for a one-reference test with a FAM group  $>$   
2069 1.84). Upper and lower boundaries of the SD interval around the admixture date were  
2070 averaged across all FAM surrogates, and thus the admixture date probably falls between  
2071 2,700 and 4,400 years ago (ya, values rounded to the nearest century, see Table S12.1). This  
2072 is a broad range, but it fits two important archaeological constraints: the arrival of P-E to  
2073 Alaska ca. 5,000 calBP and the emergence of Chukotkan Neo-Eskimos in the archaeological  
2074 record ca. 2,200 calBP in the form of the Old Bering Sea culture (Mason et al. 2016). We  
2075 expect that the formative admixture event that gave rise to Eskimo-Aleut speakers

2076 happened at least few centuries before the back-migration of Yup'ik and Inuit ancestors to  
2077 Chukotka, thus the estimate of 2,700 ya and earlier seems realistic.

2078 Ancient Aleuts are expected to yield “cleaner” results because of the absence of the  
2079 C-K gene flow (section 10), however this group is composed of just 6 pseudo-haploid non-  
2080 contemporaneous samples (Supplementary Table 2). Although 8 FAM surrogates resulted in  
2081 two-reference  $p$ -values  $< 0.05$ , all one-reference pre-tests (ancient Aleuts + FAM as  
2082 references) failed (Table S12.1), probably due to lack of power. Reassuringly, admixture  
2083 dates averaged across these 8 tests are similar to those obtained for Iñupiat: 2,700 ya to  
2084 4,900 ya. For calculating these dates, we introduced an offset of 600 ya by averaging the  
2085 calibrated radiocarbon dates obtained for the 6 ancient Aleut individuals analyzed here  
2086 (Supplementary Table 2) and rounding to the nearest hundredth. The admixture dates  
2087 estimated for the ancient Ekven population (16 ind.) were roughly 400 years older (Table  
2088 S12.1). For this population, we introduced an offset of 1000 ya by averaging the calibrated  
2089 radiocarbon dates obtained for the 16 ancient individuals buried at Ekven and analyzed here  
2090 (Supplementary Table 2) and rounding to the nearest hundredth. The admixture dates  
2091 estimated for two present-day Yup'ik groups (9 and 15 ind.) were even older than those for  
2092 Ekven (Table S12.1). The results for the Yup'ik and Ekven groups were most probably  
2093 confounded by a high proportion of PPE ancestry contributed by the second (C-K) gene flow  
2094 (Extended Data Fig. 8, sections 5, 8, and 10).

2095

2096 *References (for this section)*

2097 Loh, P. R. *et al.* Inferring admixture histories of human populations using linkage disequilibrium. *Genetics* **193**,  
2098 1233–1254 (2013).

2099 Mason, O. K. The Old Bering Sea florescence about Bering Strait. *The Oxford Handbook of the Prehistoric Arctic*,  
2100 ed. Friesen, T. M., Mason, O. K. New York: Oxford University Press. 417–442 (2016).

2101

## 2102 **Supplementary Information section 13**

### 2103 **Overview of the Dene-Yeniseian linguistic hypothesis**

2104 by Edward J. Vajda

2105

2106 The Dene-Yeniseian language hypothesis is considered here in light of the demonstrated  
2107 Paleo-Eskimo genetic contribution to modern Tlingit, Eyak and Athabaskan speakers dated  
2108 to ~4,400-5,000 ya and shared more distantly with Siberians at a time depth of ~6,200 ya  
2109 (Table S9.2). The timing of this genetic link and plausible archaeological patterning  
2110 described below provide the first evidence apart from linguistics that realistically supports  
2111 the Dene-Yeniseian language hypothesis. Given that Paleo-Eskimo-related ancestry is  
2112 likewise found in populations speaking Eskimo-Aleut and Chukotko-Kamchatkan languages,  
2113 the Paleo-Eskimo linguistic legacy could instead be associated with the origins of either of  
2114 these families rather than with Dene-Yeniseian. However, because the accumulated Dene-  
2115 Yeniseian and internal Na-Dene comparative linguistic evidence correlates so plausibly with  
2116 the coalescence dates of the Paleo-Eskimo genetic loci shared by populations speaking  
2117 precisely these languages, it is useful to elaborate further on the potential significance of  
2118 these results for situating the Dene-Yeniseian language family in space and time – questions  
2119 left without clear answers in Kari and Potter (2010) and the genetic results of this paper.

2120 The Dene-Yeniseian hypothesis posits that the Ket language spoken near the Yenisei  
2121 River in Central Siberia is related to the widespread Na-Dene language family in North  
2122 America. Na-Dene comprises Tlingit and the recently extinct Eyak in Alaska along with over  
2123 thirty Athabaskan languages spoken from the western North American Subarctic to pockets  
2124 in California (Hupa), Oregon (Tolowa) and the American Southwest (Navajo, Apache) (Krauss  
2125 1976). The severely endangered Ket is the sole survivor of Siberia's once widespread  
2126 Yeniseian language family, whose ancient presence in the region predates the expansion of  
2127 reindeer breeders and other pastoralists in North and Inner Asia (Dul'zon 1959, 1962, Vajda  
2128 2001, 2009, Werner 2005). Dene-Yeniseian as a linguistic hypothesis dates back to at least  
2129 1923, when Italian linguist Alfredo Trombetti linked Athabaskan and Tlingit with Ket on the  
2130 basis of a few similar-sounding words (Trombetti 1923). In the past two decades new  
2131 evidence supporting the connection has been published in the form of shared  
2132 morphological systems and lexical cognates showing interlocking sound correspondences  
2133 (Ruhlen 1998, Vajda 2001, Werner 2004, Vajda 2010a, 2010b). However, Dene-Yeniseian  
2134 cannot be accepted as a proven language family until the evidence of lexical and  
2135 morphological correspondences between Yeniseian and Na-Dene is significantly expanded  
2136 and tested by further critical analysis. It will also be essential to determine the potential  
2137 relationship between Yeniseian and Old World languages and families such as Sino-Tibetan,  
2138 North Caucasian, and the Burushaski isolate of northern Pakistan – all of which have been  
2139 proposed at various times in the past as relatives of Yeniseian, and sometimes also of Na-  
2140 Dene (G. Starostin 2010). While parallel research from genetics, archaeology and folklore  
2141 studies cannot prove a language connection (only comparative linguistic analysis can  
2142 accomplish that), interdisciplinary archaeological and genetic studies can demonstrate in  
2143 important ways the plausibility or implausibility of such a connection, as well as situating  
2144 populations in space and time.

2145 The timing of the Dene-Yeniseian language split could shed important light on Native  
2146 American as well as North Asian prehistory. In attempting to reconcile the apparent  
2147 closeness of Yeniseian and Na-Dene grammatical homologies with what at the time was

2148 assumed to be a much greater genetic distance between Ket and Na-Dene speakers, Potter  
2149 (2010) discussed a number of possible scenarios for the Dene-Yeniseian connection,  
2150 including: 1) a Late Pleistocene separation connected with the Paleo-Indian migrations into  
2151 the Americas, with an extraordinary slow rate of linguistic change; 2) a separation involving  
2152 a back migration of Yeniseians from Beringia; and 3) an Early to Mid-Holocene separation  
2153 connected with the entrance into Alaska around 5,000 calBP by the population associated  
2154 with the Arctic Small Tool tradition (ASTt) (see also Dumond 2010). The first two scenarios  
2155 are unlikely based on results from this paper, while the third becomes more plausible (see  
2156 below).

2157 In contrast to the ability of archaeologists to radiocarbon-date their finds, or  
2158 geneticists to calibrate the time separating two related populations, there is no universally  
2159 accepted method to reliably and precisely compute the time of separation of languages  
2160 known to be genealogically related. All proposed methods of dating prehistoric language  
2161 splits have been criticized (Campbell 2013:447-492). McMahon & McMahon (2005: 177-  
2162 204) distinguish between methods of establishing relatedness or degrees of relatedness  
2163 between languages (lexicostatistics) from the use of such data to assign precise dates for  
2164 prehistoric language splits based on an assumed regular rate of linguistic change  
2165 (glottochronology), which in fact does not exist across languages or even in a single  
2166 language over time. While rejecting glottochronology, McMahon & McMahon (2005:204)  
2167 support the value of gathering and comparing lexicostatistic data, which then can  
2168 sometimes be useful for purposes of dating when combined with facts from other  
2169 disciplines such as archaeology and genetics. Several types of evidence can potentially be  
2170 combined with evidence of shared vocabulary and grammatical homologies to help narrow  
2171 the range of plausible separation dates between related languages. For Dene-Yeniseian, all  
2172 of them suggest a split roughly between 9,000 and 7,000±500 ya. The shallower end is  
2173 favored by the detailed morphological homologies shared by the two families (Nichols  
2174 2010). The deeper end, which is suggested by the more meager number of shared lexical  
2175 cognates, would still be far too shallow to match a connection with the earliest Paleo-Indian  
2176 migrations during the Late Pleistocene. However, this range does provide a realistic  
2177 temporal parallel for the migration of ASTt ancestors from North Asia into the Americas  
2178 about 5,000 calBP. If this population consisted of Pre-Proto-Na-Dene speakers, then the split  
2179 with their Yeniseian-speaking cousins in south-central Siberia would necessarily have been  
2180 earlier.

2181 Most previous calculations by historical linguists place the timeline for the internal  
2182 diversification of Na-Dene languages between 6,000 and 3,500 ya. All Athabaskan  
2183 languages, whether spoken in Alaska, Canada, California, or Arizona, share over 70%  
2184 cognates in basic vocabulary, the number becoming higher if the list includes words  
2185 associated with northern boreal forest lifeways, such as 'birch', 'wolverine', etc. Krauss  
2186 (1976:330) showed that all Athabaskan languages share 33% of basic vocabulary from the  
2187 100-word Swadesh List with Eyak. Athabaskan-Eyak, in turn, is clearly more distantly related  
2188 to the Tlingit dialect cluster spoken in the southeast Alaskan coast and parts of interior  
2189 Yukon Territory (Heggarty & Renfrew 2014:1236). Using a variety of lexicostatistic methods  
2190 and reliable data, Krauss (1976:333) estimated a time depth for Proto-Athabaskan of  
2191 2,400±500 years and for Athabaskan-Eyak of 3,400±500 years. Estimates for the earlier  
2192 breakup of Tlingit and Athabaskan-Eyak range from 6,000 (Mülenbernd & Rama 2017) or  
2193 5,000 years (Swadesh 1958) to as shallow as 3,500 years (Kaufman & Golla 2000), with an  
2194 estimate of 4,500 years by Krauss (1980:11-13). The deeper dates would be favored by the  
2195 known conservatism of Na-Dene languages and also by the fact that the phylogenetic

2196 relationship between Athabaskan-Eyak-Tlingit (Na-Dene) was universally accepted only in  
2197 the past decade, despite being suspected for over a century (Campbell 2011). The late  
2198 acceptance date derives mainly from the fact that before Leer (2010), the evidence for  
2199 Athabaskan-Eyak-Tlingit in the form of shared finite verb structure significantly outweighed  
2200 the expected parallel lexical evidence, making it unclear whether language mixing rather  
2201 than genetic inheritance was involved in the historical similarities between these languages.

2202         The relatedness between Athabaskan languages, despite their far-flung geography, is  
2203 close enough that it has never been in doubt (Campbell 1997). This suggests a rapid spread  
2204 from a common source, most likely somewhere in Northwestern Canada near the current  
2205 border between British Columbia and Alaska or in adjacent parts of Interior Alaska. Another  
2206 support for a recent dispersal is the high rate of mutual intelligibility between  
2207 geographically distant Athabaskan languages (Krauss 1976). Some scholars posit a time  
2208 depth for Proto-Athabaskan as shallow as 2,000 ya (Kaufman & Golla 2000), though a date  
2209 closer to 3,000 is more likely given the resistance to borrowing observed with all of these  
2210 languages. A time depth of at least 2,500 years for Athabaskan, following the estimate in  
2211 Krauss (1976), would concur with the westward spread of the Taltheilei Culture beginning  
2212 2,750 calBP, which has been previously linked with the spread of Athabaskan speakers  
2213 (Potter 2010, Kari 2010).

2214         The interior Alaskan and northwestern Canadian portions of the Athabaskan range  
2215 show no clear archaeological evidence of prehistoric population replacement during the  
2216 past ~6000 years (Potter 2010, Kari 2010). For this reason, Kari (2010) posits that the  
2217 Athabaskans have lived in interior northwestern North America for at least that span of  
2218 time. Kari cites the near complete absence of substrate place names in the Northern  
2219 Athabaskan areas as evidence for their ancient occupation of these areas. However, the  
2220 Navajo and Apache areas of the American Southwest likewise have virtually no toponymic  
2221 substrate from the languages previously spoken there, yet the Athabaskan presence in this  
2222 area dates no farther back than 1,200 calBP. This reflects a strong Athabaskan avoidance of  
2223 borrowing place names rather than ancient occupancy. In any event, such a degree of  
2224 linguistic conservatism, whereby geographically distant languages maintain mutual  
2225 intelligibility over a span of ~6000 years, would be unique and unprecedented. After  
2226 adjusting for the conservatism of Na-Dene languages, retention rates for vocabulary and  
2227 grammatical structures would appear to support a time depth of 5,000±500 years for the  
2228 ancestral Athabaskan-Eyak-Tlingit language (i.e., Proto-Na-Dene). This coheres well with the  
2229 possibility that the language ancestral to Na-Dene could have been introduced around 5,000  
2230 ya into Alaska by North Asian immigrants associated with the later development and spread  
2231 of the ASTt. Also probably connected with these “Paleo-Eskimos” is the spread of other  
2232 elements of North Asian material culture and folklore (Alekseenko 1995; Berezkin 2015) to  
2233 the Na-Dene.

2234         Like the Athabaskan family, Yeniseian languages are obviously related genealogically.  
2235 Ket and its now extinct relatives (Yugh, Kott, Assan, Arin, and Pumpokol) were recognized as  
2236 closely related more than 150 years ago (Vajda 2001). Studies of substrate toponyms (Vajda  
2237 2018b) show that the known Yeniseian daughter branches (except the Ket-Yugh sub-branch)  
2238 had already diversified by 2,000 ya, when Turkic and Uralic-speaking pastoralists started  
2239 displacing them in most of their southern and western territory, acquiring Ket-related river  
2240 names and other substrate linguistic elements in the process. If the main sub-branching  
2241 existed 2,000 years ago, the family is clearly older. The high rate of shared cognates in basic  
2242 vocabulary (over 70%) between Ket and Kott, which belong to different primary branches of

2243 the family, suggest that Proto-Yeniseian must be at least 2,500 to 3,000 years, if not older,  
2244 which would roughly match the more plausible estimates of time depth for Athabaskan. It is  
2245 possible to reconstruct Proto-Yeniseian vocabulary (Starostin 1995) and many aspects of  
2246 grammatical structure (Vajda 2013; Vajda 2017) with a high degree of confidence. If Para-  
2247 Yeniseian linguistic relatives once existed in other parts of North Asia, the influx of pastoral  
2248 tribes from the south must have obliterated them during the past 3,000 years, leaving no  
2249 observable traces. Taking into account the probability of language extinction, the breakup of  
2250 the earliest Proto-Yeniseian language, one predating the form reconstructable on the basis  
2251 of Ket and Kott, could conceivably have begun earlier than 3,000 ya.

2252 All Na-Dene languages share innovations demonstrating their equidistance from  
2253 Yeniseian, whose split from the language ancestral to Na-Dene must be older than Proto-  
2254 Na-Dene itself. To cite one particularly vivid example, Pre-Proto-Na-Dene restructured three  
2255 of its inherited Dene-Yeniseian verb prefixes into the so-called classifier complex, for which  
2256 the family is well known. All three component prefixes have cognates in Yeniseian but did  
2257 not develop the characteristic function of transitivity increase and decrease found in all Na-  
2258 Dene languages (Vajda 2016, 2017, 2018a). Contrary to Holton and Sicoli (2014), there is no  
2259 linguistic evidence indicating a back migration into Asia of Yeniseian speakers from Beringia  
2260 after Na-Dene had already begun to diversify.

2261 The evidence supporting Dene-Yeniseian so far appears asymmetrically stronger in  
2262 the realm of shared morphology than in the lexicon (Nichols 2010). The number and  
2263 specificity of homologies in verb structure on their own would seem to preclude a  
2264 separation earlier than the Mid-Holocene. Given the low number of lexical cognates, the  
2265 time depth of Dene-Yeniseian may be twice that of Na-Dene. So far, the number of  
2266 proposed Dene-Yeniseian cognates, even if all of them are valid, is less than half the number  
2267 shared between Tlingit and Athabaskan-Eyak. If the Dene-Yeniseian linguistic link is fully  
2268 demonstrable, however, substantially more abundant evidence of lexical cognates should  
2269 be expected to emerge as the sound correspondences shared between the two families are  
2270 fully worked out, favoring a shallower time depth range in line with the morphological  
2271 evidence. This would repeat the historiography of Athabaskan-Eyak-Tlingit comparative  
2272 linguistic studies, whereby the family's striking parallels in verb morphology were  
2273 successfully identified well in advance of the accumulation of a large enough body of  
2274 cognates in basic vocabulary to support a full range of systematic sound correspondences  
2275 between Tlingit and Athabaskan-Eyak and fully demonstrate the Na-Dene family.

2276 Though linguistic science can only rarely offer precise dates for prehistoric language  
2277 splits, few linguists would claim it is not possible to distinguish a split that occurred two or  
2278 three thousand years ago from one that is at least six or seven thousand years old. The  
2279 evidence that can be brought to bear on the possible time depth of the lexical and  
2280 grammatical homologies shared by Yeniseian and Na-Dene all point roughly to an Early to  
2281 Mid-Holocene date of 9,000 to 7,000 ya as a plausible time depth for the breakup of Dene-  
2282 Yeniseian. A separation date significantly earlier than 9,000 ya would be incompatible with  
2283 generally accepted facts about language change, while a date significantly more recent than  
2284 7,000 ya is contradicted by the fact that Na-Dene itself shows evidence of internal  
2285 diversification that likely began at least 4,500 ya (Krauss 1976). Both the grammatical and  
2286 lexical comparative data indicate that the Dene-Yeniseian connection is significantly deeper  
2287 than Proto-Na-Dene but still detectable using the Comparative Method. The accumulated  
2288 linguistic and genetic evidence preclude the possibility that the Dene-Yeniseian connection  
2289 dates back to the original peopling of the Americas from a common Beringian population, or



2290 that the Yeniseians derive from a recent back migration from Alaska across Bering Strait.  
2291 Rather, the connection of Dene-Yeniseian with the ASTt migration, first suggested explicitly  
2292 by Dumond (2010) and Potter (2010), appears increasingly plausible. These early  
2293 suggestions assumed a congruence between language, material culture, and genetics, and  
2294 did not consider more complex admixture models.

2295         However, the language(s) of a prehistoric population can never be identified based  
2296 on DNA studies alone, and pairing genetic and linguistic data to hypothesize about the  
2297 language of the founding ASTt population yields at least four additional possibilities. The  
2298 ASTt / Paleo-Eskimo people could have spoken a language that disappeared leaving no living  
2299 descendants. A second possibility is that the material culture known as ASTt, along with  
2300 related Siberian Neolithic groups, could reflect multiple populations speaking different  
2301 languages, including Proto-Eskimo-Aleut, Proto-Na-Dene, Proto-Chukotko-Kamchatkan, and  
2302 perhaps others. It is also possible that the Paleo-Eskimos spoke only Proto-Eskimo-Aleut and  
2303 were responsible for introducing that family into the Americas five millennia ago. Eskimo-  
2304 Aleut consists of a branch containing the closely related Eskimoan languages (Yup'ik,  
2305 Iñiupiaq, etc.), probably separated at a depth of less than 2,500 years, and a more divergent  
2306 Aleut branch. Krauss (1980:7) roughly estimates the split between Eskimoan and Aleut at  
2307 about 4,000 ya, which, even with the inexactness of linguistic time depth estimations, would  
2308 still roughly fit the scenario that the original Paleo-Eskimo founding population may have in  
2309 fact spoken Proto-Eskimo-Aleut (Fortescue 2017). The Eskimo-Aleut family is less likely to  
2310 descend from a language brought into North America during the Pleistocene than from a  
2311 language brought from Asia after 5,000 ya, given the many typological, areal, and possibly  
2312 deep genetic affinities it shares with Uralic, Yukaghir and other North Asian families that  
2313 have long been noted by linguists (Fortescue 1998, 2017). The fourth possibility is that the  
2314 ASTt population, which also shows a close genetic link to present-day Chukchi and Koryak  
2315 peoples in the Russian Far East, could have spoken a language belonging to the Chukotko-  
2316 Kamchatkan family, but which subsequently disappeared in North America, leaving living  
2317 relatives only on the Asian side of Bering Strait. Within Chukotko-Kamchatkan, the Itelmen  
2318 branch is quite divergent from the family's other branch, which contains Chukchi and Koryak  
2319 – languages so similar that they could almost be regarded as dialects of a single language  
2320 (Comrie 1981: 240). Estimating the age of this family as a whole, however, is hindered by  
2321 the probability that the Itelmen and Chukchi-Koryak sub-branches mixed with different  
2322 neighbor languages (Fortescue 1998: 210-213). The same could be argued for estimating the  
2323 Aleut split with Eskimoan, as Aleut also shows possible signs of substrate admixture or at  
2324 least of rapid phonological and morphological change (Fortescue 1998: 35-37), which could  
2325 make the split appear older than it actually is. Chukotko-Kamchatkan and Eskimo-Aleut are  
2326 both regarded as first-order families, not relatable to one another using the Comparative  
2327 Method. A fully convincing demonstration of the Dene-Yeniseian linguistic hypothesis,  
2328 however, would favor the scenario whereby Paleo-Eskimos brought a language directly  
2329 ancestral to Proto-Na-Dene into Alaska, whether or not this was the only language spoken  
2330 by bearers of the culture known as ASTt. The genetic link through Paleo-Eskimos between  
2331 present-day Siberians (including Kets) and the population ancestral to Na-Dene speaking  
2332 peoples appears to be the only physical connection between the two groups that falls within  
2333 a time depth known to be recoverable by the Comparative Method.

2334         Table S14.1 below summarizes a plausible prehistoric scenario for the existence of a  
2335 Dene-Yeniseian language link involving the Paleo-Eskimo arrival into Alaska 5,000 calBP  
2336 from an earlier source in the Syalakh Culture (6,500 to 5,200 calBP) spreading eastward  
2337 from Siberia.

2339 **Table S14.1. Chronology of Dene-Yeniseian linguistic diversification**

~5,900-6,700 ya – breakup of the Dene-Yeniseian proto-language in central-eastern Siberia (based on the coalescence date of Paleo-Eskimo ancestry shared between contemporary Siberians and Na-Dene-speaking populations, see Table S9.2); speakers of the language ancestral to Proto-Yeniseian remained in Siberia, where diversification of the known Yeniseian daughter languages is unlikely to predate 4,000 ya (based on lexicostatistic estimates).

~5,000 ya – language ancestral to Proto-Na-Dene, and possibly also the language ancestral to Eskimo-Aleut, brought into Alaska by Paleo-Eskimos (indexed by archaeological data).

after 5,000 ya – split between Tlingit and Athabaskan-Eyak (indexed by the coalescence date of Paleo-Eskimo genetic ancestry shared by contemporary Na-Dene peoples, see Table S9.2).

~3,400 to 3,000 ya – split between Eyak and Athabaskan (based on lexicostatistic estimates).

~2,700 to 2,200 ya – beginning of diversification and spread of Athabaskan languages (based on lexicostatistic estimates).

2340 Despite the shared Paleo-Eskimo genetic component in their speaker populations,  
2341 the Dene-Yeniseian, Eskimo-Aleut, and Chukotko-Kamchatkan language families are not  
2342 relatable to one another using the Comparative Method. Various deep connections have  
2343 been proposed between Eskimo-Aleut, Uralic, and sometimes Yukaghiric and other Eurasian  
2344 families (Fortescue 1998; see Campbell and Poser 2008 for a critique); however, even if any  
2345 of these hypotheses are valid, the linguistic unity in question would greatly predate the  
2346 spread of Middle Holocene cultures as well as the coalescence dates of the Paleo-Eskimo  
2347 genetic ancestry shared by their speakers.

2348

2349 *References (for this section)*

- 2350 Alekseenko, E. A. K izucheniju mifologicheskikh paralelej medvezh'emu kul'tu ketov [Mythological parallels to  
2351 the Ket Bear Cult]. *Sistemnye Issledovanija Vzaimosvjazi Drevnikh Kul'turr Sibiri i Severnoj Ameriki. Vypusk*  
2352 *2: Dukhovnaja Kul'tura*. St. Petersburg: RAN, 22-46. (1995).
- 2353 Berezkin, Y. Sibirskij fol'klor i proiskhozhdenie na-dene [Siberian folklore and Na-Dene origins]. *Arkheologija,*  
2354 *Ėtnografija i Antropologija Evrazii* **43.1**: 122-134. (2015)
- 2355 Campbell, L. *American Indian Languages: The Historical Linguistics of Native America*. Oxford: Oxford  
2356 University Press (1997).
- 2357 Campbell, L. Review of "The Dene-Yeniseian Connection". *International Journal of American Linguistics* **77.3**,  
2358 445-451 (2011).
- 2359 Campbell, L. *Historical Linguistics: An Introduction* (3<sup>rd</sup> edition). Cambridge, Mass.: MIT Press (2013).
- 2360 Campbell, L. & Poser, W. *Language Classification: History and Method*. Cambridge: Cambridge University Press.  
2361 (2008).
- 2362 Comrie, B. *The Languages of the Soviet Union*. Cambridge: Cambridge University Press. (1981).
- 2363 Dul'zon, A. P. Ketskie toponimy Zapadnoj Sibiri [Ket toponyms of Western Siberia]. *Uchenye Zapiski Tomskogo*  
2364 *Gosudarstvennogo Pedagogicheskogo Instituta [Scholarly Proceedings of Tomsk State Pedagogical*  
2365 *Institute]* **18**, 91–111 (1959).
- 2366 Dul'zon, A. P. Byloe rasselenie ketov po dannym toponimiki [The former settlement of the Kets according to

- 2367 the facts of toponymy]. *Voprosy Geografii* **68**, 50–84 (1962).
- 2368 Dumond, D. The Dene arrival in Alaska. *The Dene-Yeniseian Connection*, ed. Kari, J., Potter, B. *Anthropological*
- 2369 *Papers of the University of Alaska: New Series* **5**, 335-346 (2010).
- 2370 Fortescue, M. *Language Relations Across Bering Strait: Reappraising the Archaeological and Linguistic*
- 2371 *Evidence*. London & New York: Cassell (1998).
- 2372 Fortescue, M. The relationship of Nivkh to Chukotko-Kamchatkan revisited. *Lingua* **121**: 1359-1376 (2011)
- 2373 Fortescue, M. Correlating Palaeo-Siberian language populations: Recent advances in the Uralo-Siberian
- 2374 Hypothesis. *Man in India*: **97.1**, 47-68 (2017).
- 2375 Golla, V. *California Indian Languages*. Berkeley, Los Angeles, London: University of California Press (2011).
- 2376 Heggarty, P, & Renfrew, C. The Americas: languages. *Cambridge World Prehistory*. Cambridge: Cambridge
- 2377 University Press, 1326-1353 (2014).
- 2378 Holton G, & Sicoli, M. 2014. Linguistic phylogenies support back-migration from Beringia to Asia. *PLoS ONE* **9.3**:
- 2379 e91722. doi:10.1371/journal.pone.0091722
- 2380 Kari, J. The concept of geolinguistic conservatism in Na-Dene prehistory. *The Dene-Yeniseian Connection*, ed.
- 2381 Kari, J., Potter, B. *Anthropological Papers of the University of Alaska: New Series* **5**, 194-222. (2010).
- 2382 Kari, J, & Potter, B. (Eds.). *The Dene-Yeniseian Connection. Anthropological Papers of the University of Alaska:*
- 2383 *New Series* **5**. Fairbanks, AK: ANLC (2010).
- 2384 Kaufman, T., & Golla, V. Language groupings in the New World: their reliability and usability in cross-
- 2385 disciplinary studies. *America Past, America Present: Genes and Languages in the Americas and Beyond*, ed.
- 2386 Renfrew, C. Cambridge: Macdonald Institute for Archaeological Research, 47-57 (2000).
- 2387 Krauss, M. Na-Dene. *Native Languages of the Americas*, vol. 1, ed. Sebeok, T. A. New York & London: Plenum
- 2388 Press, 283-358 (1976).
- 2389 Krauss, M. *Alaska Native Languages: Past, Present and Future*. Fairbanks, AK: ANLC (1980).
- 2390 Krauss, M. Athabaskan tone. *Athabaskan Prosody*, ed. Hargus, S., Rice, K, Amsterdam & New York: John
- 2391 Benjamins, 55-136 (2005).
- 2392 Leer, J. *Comparative Athabaskan Lexicon*: www.uaf.edu/anla/collections/ca/cal/ (2006).
- 2393 Leer, J. The palatal series in Athabaskan-Eyak-Tlingit with an overview of the basic sound correspondences. *The*
- 2394 *Dene-Yeniseian Connection*, ed. Kari, J., Potter, B. *Anthropological Papers of the University of Alaska: New*
- 2395 *Series* **5**, 168-193 (2010).
- 2396 McMahon, A, & McMahon, R. *Language Classification by Numbers*. Oxford: Oxford University Press (2005).
- 2397 Mühlenbernd, R., & Rama, T. What phoneme networks tell us about the age of language families. *Journal of*
- 2398 *Language Evolution* **2**, 67-76. (2017).
- 2399 Nichols, J. Proving Dene-Yeniseian genealogical relatedness. *The Dene-Yeniseian Connection*, ed. Kari, J.,
- 2400 Potter, B. *Anthropological Papers of the University of Alaska: New Series* **5**, 299-309 (2010).
- 2401 Pevnov, A. M. The problem of the localization of the Tungus-Manchu homeland. *Recent advances in Tungusic*
- 2402 *linguistics*, ed. A. Malchukov, Whaley, L. Wiesbaden: Harrassowitz, 17-40. (2012).
- 2403 Potter, B. Archaeological patterning in northeast Asia and northwest North America: an examination of the
- 2404 Dene-Yeniseian Hypothesis. *The Dene-Yeniseian Connection*, ed. Kari, J., Potter, B. *Anthropological Papers*
- 2405 *of the University of Alaska: New Series* **5**, 138-167 (2010).
- 2406 Ruhlen, M. The origin of the Na-Dene. *Proc. Natl. Acad. Sci. USA* **95**, 13994–13996 (1998).
- 2407 Starostin, G. Dene-Yeniseian and Dene-Caucasian: pronouns and other thoughts. *Working Papers in*
- 2408 *Athabaskan Languages* **8**. Fairbanks, AK: ANLC, 107-117 (2010).
- 2409 Starostin, S. A. Sravnitel'nyj slovar' enisejskikh jazykov [A comparative vocabulary of Yeniseian languages].
- 2410 *Ketskij Sbornik* vol. 4, Moscow: Vostochnaja Literatura, 176-315 (1995).
- 2411 Swadesh, M. Some new glottochronological dates for Amerindian linguistic groupings. *Proceedings of the 32<sup>nd</sup>*
- 2412 *International Congress of Americanists* 670-674 (1958).
- 2413 Trombetti, A. *Elementi di Glottologia*. Bologna: Nicola Zanichelli. pp. 486, 511 (1923).
- 2414 Vajda, E. *Yeniseian Peoples and Languages: A History of their Study with an Annotated Bibliography and a*
- 2415 *Source Guide*. Surrey, England: Curzon Press (2001).
- 2416 Vajda, E. Loanwords in Ket. *The Typology of Loanwords*, ed. Haspelmath, M., Tadmor, U. Oxford: Oxford
- 2417 University Press, 125–139 (2009).
- 2418 Vajda, E. Siberian link with Na-Dene languages. *The Dene-Yeniseian Connection*, ed. Kari, J., Potter,
- 2419 B. *Anthropological Papers of the University of Alaska: New Series* **5**, 33–99 (2010a).
- 2420 Vajda E. Yeniseian, Na-Dene, and historical linguistics. *The Dene-Yeniseian Connection*, ed. Kari, J., Potter, B.
- 2421 *Anthropological Papers of the University of Alaska: New Series* **5**, 100–118 (2010b).
- 2422 Vajda, E. Vestigial possessive morphology in Na-Dene and Yeniseian. *Working Papers in Athabaskan (Dene)*
- 2423 *Languages 2012*. (Alaska Native Language Center Working Papers No. 11). Fairbanks: ANLC, 79-91 (2013).
- 2424 Vajda, E. Dene-Yeniseian. *Oxford Research Encyclopedia of Linguistics*. Oxford Online (2016).

- 2425 Vajda, E. Patterns of innovation and retention in templatic polysynthesis. *Handbook of Polysynthesis*, ed.  
2426 Fortescue, M, Mithun, M., Evans, N. Oxford: Oxford University Press, 363-391 (2017).  
2427 Vajda, E. Dene-Yeniseian: progress and unanswered questions. *Diachronica* 35.2: 277-295 (2018a).  
2428 Vajda, E. Yeniseian and Athapaskan toponyms. *Language and Toponymy in Alaska and Beyond*. (2018b).  
2429 Werner, H. *Zur jenseits-indianischen Urverwandtschaft [Yeniseian and Native American Relatedness]*.  
2430 Wiesbaden: Harrassowitz (2004).  
2431 Werner, H. *Die Jenisej-Sprachen des 18. Jahrhunderts [Yeniseian Languages of the 18th Century]*. Wiesbaden:  
2432 Harrassowitz (2005).  
2433

## 2434 **Supplementary Discussion**

2435 The time and place of the Eskimo-Aleut founder admixture event remains uncertain. Under  
2436 our demographic model, the admixture event that is shared by all members of this lineage  
2437 was dated by two independent methods, *ALDER* and *Rarecoal*, at 2,700-4,900 ya and 4,400-  
2438 4,900 ya, respectively (Fig. 2b, Supplementary Information section 12), and involved a  
2439 substantial (~55-62%) genetic contribution from a Northern First Peoples population distantly  
2440 related to Athabaskans (Fig. 2). There is no clear archaeological evidence for a Native  
2441 American back-migration to Chukotka<sup>1,2</sup>, increasing the weight of evidence that this  
2442 admixture event occurred in Alaska. Indeed, the Alaskan Peninsula and Kodiak Archipelago  
2443 have long been suggested as a source of influences shaping the Neo-Eskimo material  
2444 culture<sup>3,4</sup> (Fig. 3b). Some of the earliest maritime adaptations in Beringia and America are  
2445 encountered in this region associated with the Ocean Bay tradition (~6,800 – 4,500 calBP)<sup>5,6</sup>.  
2446 Around 4,000 calBP, the Ocean Bay tradition was succeeded by the Early Kachemak tradition,  
2447 which is seen as a dramatic departure from the preceding phase, with some archaeological  
2448 evidence for contacts with the Paleo-Eskimo Arctic Small Tool tradition<sup>6</sup>. Given the new  
2449 genetic results, it seems possible that this cultural discontinuity is associated with the  
2450 emergence of the ancestral Eskimo-Aleut population. Early Paleo-Eskimo people used marine  
2451 resources on a seasonal basis only, depended for the most part on hunting caribou and  
2452 muskox, and lacked sophisticated hunting gear that allowed the later Inuit to become  
2453 specialized in whaling<sup>7</sup>. It is conceivable that a transfer of cultural traits and gene flow  
2454 between Paleo-Eskimos and First Peoples happened simultaneously.

2455 An important further clue is given by our finding that the ancestors of Inuit/Yup'ik  
2456 experienced bidirectional gene flow with Chukotko-Kamchatkan ancestors, while Aleuts did  
2457 not. This is consistent with a scenario of PPE/First Peoples admixture in Alaska, and a  
2458 subsequent migration of Aleut ancestors into the Aleutian Islands (Fig. 3b), which might  
2459 have occurred around 4,000 calBP according to known discontinuities in the Aleutian  
2460 archaeological record (the onset of the Margaret Bay phase, which saw an influx of ASTt and  
2461 Kodiak elements<sup>8</sup>). Conversely, ancestors of Inuit and Yup'ik migrated back to Chukotka,  
2462 where around 2,200 calBP they established the earliest culture securely assigned  
2463 archaeologically and genetically to Neo-Eskimos<sup>9</sup>, i.e. the Old Bering Sea culture<sup>10,11</sup>,  
2464 admixed with local populations, most likely in interior Chukotka, and re-expanded from  
2465 there to Alaska and later throughout the American Arctic. The Thule expansion was likely  
2466 driven by innovations in hunting and the food surplus created by whaling. The oldest Old  
2467 Bering Sea individual in this study was dated to ~1,500-1,900 calBP, which also overlaps our  
2468 estimated time of the bidirectional admixture between Inuit/Yup'ik ancestors and  
2469 Chukotko-Kamchatkan-speaking groups (~1,700-2,300 ya).

2470 A succession of western Alaskan cultures, namely the Old Whaling, Choris, Norton,  
2471 and Ipiutak (with the earliest dates around 3,100, 2,700, 2,500, and 1,700 calBP,  
2472 respectively), combined cultural influences from earlier local Paleo-Eskimo sources as well  
2473 as sources in Chukotka and southwestern Alaska<sup>3,12</sup>. Parallels between these cultures and  
2474 subsequent Neo-Eskimos are notable<sup>3</sup>, and they might represent partial links between the  
2475 founding population at 4,800 ya and the Old Bering Sea culture at 2,200 calBP (Fig. 3b). The  
2476 location and source populations for early Eskimo-Aleuts will likely be resolved if future  
2477 analyses can include samples from these western Alaskan traditions, as well from the Ocean  
2478 Bay and Kachemak traditions in southwestern Alaska.

2479 The descendants of the proto-Paleo-Eskimo lineage speak widely different

2480 languages, belonging to the Chukotko-Kamchatkan, Eskimo-Aleut, and Na-Dene families.  
 2481 Based on lexicostatistical studies of languages surviving in the 20<sup>th</sup> century, the time depth  
 2482 of the former two families is likely shallow, and the Na-Dene family is probably much older,  
 2483 on the order of 5,000 years (Supplementary Information section 13). Thus, while the  
 2484 linguistic affiliation of Paleo-Eskimos is impossible to determine from genetic data, the  
 2485 finding that the most diverse linguistic group whose speakers carry large proportions of PPE  
 2486 ancestry is Na-Dene and that Na-Dene linguistic variation may reach back to the Paleo-  
 2487 Eskimo period suggests that proto-Na-Dene may have been spoken by a Paleo-Eskimo  
 2488 population. A Siberian linguistic connection was proposed for the Na-Dene family under the  
 2489 Dene-Yeniseian hypothesis<sup>13,14</sup>. This hypothetical language macrofamily unites Na-Dene  
 2490 languages and Ket, the only surviving remnant of the Yeniseian family, once widespread in  
 2491 South and Central Siberia<sup>15,16</sup>. Although the Dene-Yeniseian family is not universally  
 2492 accepted among historical linguists<sup>17,18</sup>, and correlations between linguistic and genetic  
 2493 histories are far from perfect, evidence of a genetic connection between Siberian and Na-  
 2494 Dene populations mediated by Paleo-Eskimos suggests that future research should further  
 2495 explore Dene-Yeniseian as a genealogical family<sup>14</sup> or as part of a wider clade<sup>18</sup>.

2496 *References (for this section)*

- 2497 1. Potter, B. A. Archaeological patterning in Northeast Asia and Northwest North America: an examination of  
 2498 the Dene-Yeniseian hypothesis. *The Dene-Yeniseian Connection*, ed. Kari, J., Potter, B. A. *Anthropological*  
 2499 *Papers of the University of Alaska: New Series* 5, 138–167 (2010).
- 2500 2. Hoffecker, J. F. & Elias, S. A. *Human Ecology of Beringia*. New York: Columbia University Press (2007).
- 2501 3. Dumond, D. E. Norton hunters and fisherfolk. *The Oxford Handbook of the Prehistoric Arctic*, ed. Friesen, T.  
 2502 M., Mason, O. K. New York: Oxford University Press. 395–416 (2016).
- 2503 4. Ackerman, R. E. Early maritime traditions in the Bering, Chukchi, and East Siberian seas. *Arctic Anthropol.*  
 2504 35, 247–262 (1998).
- 2505 5. Fitzhugh, B. The origins and development of Arctic maritime adaptations in the Subarctic and Arctic  
 2506 Pacific. *The Oxford Handbook of the Prehistoric Arctic*, ed. Friesen, T. M., Mason, O. K. New York: Oxford  
 2507 University Press. 253–278 (2016).
- 2508 6. Steffian, A., Saltonstall, P. & Yarborough, L. F. Maritime economies of the central Gulf of Alaska after 4000  
 2509 B.P. *The Oxford Handbook of the Prehistoric Arctic*, ed. Friesen, T. M., Mason, O. K. New York: Oxford  
 2510 University Press. 303–322 (2016).
- 2511 7. Hoffecker J. F. *A Prehistory of the North: human settlement of the higher latitudes*. Rutgers University  
 2512 Press (2004).
- 2513 8. Davis, R., Knecht, R. & Rogers, J. First Maritime Cultures of the Aleutians. *The Oxford Handbook of the*  
 2514 *Prehistoric Arctic*, ed. Friesen, T. M., Mason, O. K. New York: Oxford University Press. 279–302 (2016).
- 2515 9. Raghavan, M. *et al.* The genetic prehistory of the New World Arctic. *Science* 345, 1255832 (2014).
- 2516 10. Mason, O. K. The Old Bering Sea florescence about Bering Strait. *The Oxford Handbook of the Prehistoric*  
 2517 *Arctic*, ed. Friesen, T. M., Mason, O. K. New York: Oxford University Press. 417–442 (2016).
- 2518 11. Bronshtein, M. M., Dneprovsky, K. A. & Savintsky, A. B. Ancient Eskimo cultures of Chukotka. *The Oxford*  
 2519 *Handbook of the Prehistoric Arctic*, ed. Friesen, T. M., Mason, O. K. New York: Oxford University Press.  
 2520 469–488 (2016).
- 2521 12. Darwent, C. M. & Darwent, J. The enigmatic Choris and Old Whaling cultures of the Western Arctic. *The*  
 2522 *Oxford Handbook of the Prehistoric Arctic*, ed. Friesen, T. M., Mason, O. K. New York: Oxford University  
 2523 Press. 371–394 (2016).
- 2524 13. Ruhlen, M. The origin of the Na-Dene. *Proc. Natl. Acad. Sci. USA* 95, 13994–13996 (1998).
- 2525 14. Vajda, E. J. Siberian link with Na-Dene languages. *The Dene-Yeniseian Connection*, ed. Kari, J., Potter, B. A.  
 2526 *Anthropological Papers of the University of Alaska: New Series* 5, 33–99 (2010).
- 2527 15. Dul'zon, A. P. Byloe rasselenie Ketov po dannym toponimiki [The former settlement of the Kets according  
 2528 to the facts of toponymy]. *Voprosy Geografii* 68, 50–84 (1962).
- 2529 16. Vajda, E. J. Loanwords in Ket. *The Typology of Loanwords*, ed. Haspelmath, M., Tadmor, U. Oxford:  
 2530 Oxford University Press, 125–139 (2009).
- 2531 17. Campbell, L. Review of 'The Dene-Yeniseian Connection', ed. by James Kari and Ben A. Potter. *Int. J. Am.*  
 2532 *Linguistics* 77, 445–451 (2011).
- 2533 18. Starostin, G. Dene-Yeniseian: a critical assessment. *J. Language Relationship* 8, 117–138 (2012).
